# Supplementary material for: Identification of hub genes and transcription factor-miRNA-mRNA pathways in mice and human renal ischemia-reperfusion injury
Source: PeerJ. 2021 Oct 26;9:e12375. doi: 10.7717/peerj.12375 (PMC8555504; doi:10.7717/peerj.12375)
Supplement: Supplemental Information 3 [file peerj-09-12375-s003.xlsx]

## Sheet: 图S补充文件S差异RRA蛋白结果
SYMBOL	Name	Score	direction
Tnfrsf12a	Tnfrsf12a	1.2275e-06	up
Plaur	Plaur	6.21549e-05	up
Dusp5	Dusp5	7.76066e-05	up
Maff	Maff	8.60855e-05	up
Pvr	Pvr	0.000126527	up
Tubb6	Tubb6	0.000158828	up
Csf1	Csf1	0.000192729	up
Mt1	Mt1	0.000259374	up
Fosl1	Fosl1	0.00042112	up
Slc38a2	Slc38a2	0.000435403	up
Pdk4	Pdk4	0.000435403	up
Srxn1	Srxn1	0.000461761	up
Bcl3	Bcl3	0.000492394	up
Anxa2	Anxa2	0.000492394	up
Cdkn1a	Cdkn1a	0.000511084	up
Tacstd2	Tacstd2	0.00052348	up
Serpine1	Serpine1	0.000549576	up
Cd68	Cd68	0.000588837	up
Csrnp1	Csrnp1	0.00060939	up
Junb	Junb	0.00069027	up
Adamts1	Adamts1	0.000737488	up
Lcn2	Lcn2	0.000823859	up
Klf6	Klf6	0.000856948	up
Gprc5a	Gprc5a	0.000856948	up
Cebpb	Cebpb	0.000912305	up
Cldn4	Cldn4	0.000990183	up
Epha2	Epha2	0.000991301	up
Nfkbiz	Nfkbiz	0.00101325	up
Ptp4a1	Ptp4a1	0.0010828	up
Havcr1	Havcr1	0.00127992	up
Clcf1	Clcf1	0.00137723	up
Fosl2	Fosl2	0.0015937	up
Rell1	Rell1	0.00183436	up
Sphk1	Sphk1	0.00209203	up
Sfn	Sfn	0.00218369	up
Timp1	Timp1	0.00239536	up
Nrg1	Nrg1	0.00246313	up
Emp1	Emp1	0.002473	up
Mthfd2	Mthfd2	0.00276096	up
Dusp8	Dusp8	0.00284759	up
Txnrd1	Txnrd1	0.00321428	up
Hmga1	Hmga1	0.00327583	up
Ppm1j	Ppm1j	0.00336037	up
Asns	Asns	0.00348398	up
Sprr2g	Sprr2g	0.00357585	up
Cxcl1	Cxcl1	0.00357585	up
Sox9	Sox9	0.00390601	up
Socs3	Socs3	0.00410792	up
Glipr2	Glipr2	0.00422363	up
Slc7a5	Slc7a5	0.00422837	up
Hmox1	Hmox1	0.00434198	up
Rin1	Rin1	0.00440206	up
Il34	Il34	0.00446191	up
Krt20	Krt20	0.0044861	up
Hbegf	Hbegf	0.00596007	up
Ppp1r15a	Ppp1r15a	0.00658644	up
Gdf15	Gdf15	0.006949	up
Fos	Fos	0.00708695	up
Lmna	Lmna	0.00709628	up
Ctps	Ctps	0.00752489	up
Chac1	Chac1	0.00788927	up
Nfil3	Nfil3	0.00829194	up
Tgfbi	Tgfbi	0.00895798	up
Grp	Grp	0.0103864	up
Eaf1	Eaf1	0.0110244	up
Flnc	Flnc	0.0114083	up
Map3k6	Map3k6	0.0115301	up
Vcam1	Vcam1	0.0119014	up
Krt18	Krt18	0.0128017	up
Spp1	Spp1	0.0129343	up
Mapk6	Mapk6	0.0130534	up
Ccnl1	Ccnl1	0.0135344	up
Pdlim7	Pdlim7	0.0140268	up
Map2k3	Map2k3	0.0142772	up
Egr1	Egr1	0.0143155	up
Eno2	Eno2	0.0147232	up
Lgals3	Lgals3	0.0147232	up
Adora2b	Adora2b	0.0154955	up
Tnc	Tnc	0.0172317	up
Osmr	Osmr	0.0175077	up
Car13	Car13	0.0175077	up
F3	F3	0.0180876	up
Akap12	Akap12	0.0183602	up
Pprc1	Pprc1	0.0191054	up
Efhd2	Efhd2	0.0191337	up
Igf2bp2	Igf2bp2	0.0191337	up
Smpdl3b	Smpdl3b	0.0199225	up
Mthfd1l	Mthfd1l	0.0205581	up
Prrg4	Prrg4	0.0207555	up
1700001F09Rik	1700001F09Rik	0.0207555	up
Eif6	Eif6	0.0215458	up
Fjx1	Fjx1	0.0218247	up
Ifrd1	Ifrd1	0.0232297	up
Dusp4	Dusp4	0.0235156	up
Chrnb1	Chrnb1	0.0240943	up
Ptrh1	Ptrh1	0.0245689	up
Ccl2	Ccl2	0.0249659	up
Anxa3	Anxa3	0.0251812	up
Sprr2f	Sprr2f	0.0267643	up
Mlkl	Mlkl	0.0278714	up
Klf5	Klf5	0.0282946	up
Gm13363	Gm13363	0.0286421	up
Rnd3	Rnd3	0.0286856	up
Nop58	Nop58	0.029879	up
BC061237	BC061237	0.0311073	up
Atf4	Atf4	0.0315185	up
Itga6	Itga6	0.0315193	up
Procr	Procr	0.0320305	up
Gadd45b	Gadd45b	0.0327846	up
Slc7a1	Slc7a1	0.034965	up
Akr1b8	Akr1b8	0.0366879	up
Plk3	Plk3	0.0366879	up
Nfkb2	Nfkb2	0.0377594	up
Krt8	Krt8	0.0392335	up
Egr2	Egr2	0.0395946	up
Hpcal4	Hpcal4	0.0400776	up
Hspb1	Hspb1	0.0400776	up
Cxadr	Cxadr	0.0404368	up
D17H6S56E-5	D17H6S56E-5	0.0405643	up
Ankrd1	Ankrd1	0.0410546	up
Cenpt	Cenpt	0.0410605	up
Cstb	Cstb	0.0410605	up
Snai1	Snai1	0.041442	up
Nek6	Nek6	0.0415487	up
Eif4ebp1	Eif4ebp1	0.0415487	up
Mvp	Mvp	0.0420464	up
S100a10	S100a10	0.0421897	up
Adm	Adm	0.0433331	up
Sox4	Sox4	0.043562	up
Mafk	Mafk	0.0445911	up
Ngf	Ngf	0.0471947	up
Bag3	Bag3	0.0480495	up
Cd14	Cd14	0.0480495	up
Plp2	Plp2	0.0480495	up
Rasd1	Rasd1	0.0488592	up
Aplnr	Aplnr	0.000111272	down
Avpr2	Avpr2	0.00300433	down
Zfp101	Zfp101	0.00380694	down
Fam107a	Fam107a	0.00462868	down
Mgat3	Mgat3	0.00539522	down
Akr1c18	Akr1c18	0.00602151	down
Slc22a13	Slc22a13	0.0077611	down
Pxmp2	Pxmp2	0.00816782	down
Lrrc66	Lrrc66	0.0115533	down
Slc22a19	Slc22a19	0.0122843	down
D630039A03Rik	D630039A03Rik	0.0124378	down
Btbd2	Btbd2	0.0124378	down
Klhl24	Klhl24	0.0124378	down
Ppp1r1b	Ppp1r1b	0.0131237	down
Gnpda1	Gnpda1	0.0146681	down
Tmem86a	Tmem86a	0.0155394	down
Itih2	Itih2	0.0165135	down
Cyp7b1	Cyp7b1	0.0178719	down
Tspan18	Tspan18	0.0190622	down
Dusp15	Dusp15	0.0196674	down
Zfp750	Zfp750	0.0240045	down
Fzd1	Fzd1	0.0248508	down
Fv1	Fv1	0.0248508	down
Klhl9	Klhl9	0.0248508	down
Rhox6	Rhox6	0.0248508	down
Kyat3	Kyat3	0.0283471	down
Poli	Poli	0.0330306	down
Mep1b	Mep1b	0.0330306	down
Klhl3	Klhl3	0.0349524	down
Igfbp5	Igfbp5	0.0365739	down
Bsnd	Bsnd	0.0367642	down
Zmat1	Zmat1	0.0372392	down
A4gnt	A4gnt	0.0372392	down
5930403L14Rik	5930403L14Rik	0.0372392	down
Crebl2	Crebl2	0.0372392	down
Sfrp1	Sfrp1	0.0387726	down
Slc22a7	Slc22a7	0.0393575	down
Rab3a	Rab3a	0.0406853	down
Snx32	Snx32	0.0406853	down
Parp11	Parp11	0.0406853	down
F13b	F13b	0.0406853	down
Tril	Tril	0.0409351	down
Slc39a8	Slc39a8	0.0434025	down
Ass1	Ass1	0.0434025	down
Senp8	Senp8	0.0447919	down
Ranbp3l	Ranbp3l	0.0462017	down
4931414P19Rik	4931414P19Rik	0.0476318	down
Zfp467	Zfp467	0.0496028	down
Acmsd	Acmsd	0.0496028	down
Zfp760	Zfp760	0.0496028	down
Gm5524	Gm5524	0.0496028	down
Galm	Galm	0.0499168	down
