# Supplementary material for: Identification of hub genes and transcription factor-miRNA-mRNA pathways in mice and human renal ischemia-reperfusion injury
Source: PeerJ. 2021 Oct 26;9:e12375. doi: 10.7717/peerj.12375 (PMC8555504; doi:10.7717/peerj.12375)
Supplement: Supplemental Information 4 — TNF signaling pathway was marked in yellow. [file peerj-09-12375-s004.xlsx]

## Sheet: Sheet1
Category	Term	Count	%	PValue	Genes	List Total	Pop Hits	Pop Total	Fold Enrichment	Bonferroni	Benjamini	FDR
KEGG_PATHWAY	mmu04380:Osteoclast differentiation	5	33.3333	2.07364e-05	FOSL1, CSF1, FOS, JUNB, FOSL2	12	126	7691	25.4332	0.000870559	0.000891665	0.000891665
KEGG_PATHWAY	mmu04668:TNF signaling pathway	3	20	0.01007	CSF1, FOS, JUNB	12	109	7691	17.6399	0.346286	0.216506	0.216506
GOTERM_MF_DIRECT	GO:0045550~geranylgeranyl reductase activity	2	13.3333	0.00160435	AKR1C18, AKR1B8	15	2	17446	1163.07	0.0991052	0.0863573	0.0770573
GOTERM_MF_DIRECT	GO:0000978~RNA polymerase II core promoter proximal region sequence-specific DNA binding	4	26.6667	0.00265715	FOSL1, FOS, JUNB, FOSL2	15	359	17446	12.959	0.158816	0.0863573	0.0770573
GOTERM_MF_DIRECT	GO:0003690~double-stranded DNA binding	3	20	0.00516272	FOS, JUNB, FOSL2	15	136	17446	25.6559	0.285696	0.10405	0.0928448
GOTERM_MF_DIRECT	GO:0001758~retinal dehydrogenase activity	2	13.3333	0.00640309	AKR1C18, AKR1B8	15	8	17446	290.767	0.341334	0.10405	0.0928448
GOTERM_MF_DIRECT	GO:0004032~alditol:NADP+ 1-oxidoreductase activity	2	13.3333	0.00959034	AKR1C18, AKR1B8	15	12	17446	193.844	0.465477	0.106846	0.0953393
GOTERM_MF_DIRECT	GO:0005125~cytokine activity	3	20	0.0123681	CSF1, SPP1, TIMP1	15	214	17446	16.3047	0.554669	0.106846	0.0953393
GOTERM_MF_DIRECT	GO:0043565~sequence-specific DNA binding	4	26.6667	0.0128314	FOSL1, FOS, JUNB, FOSL2	15	633	17446	7.34955	0.568047	0.106846	0.0953393
GOTERM_MF_DIRECT	GO:0000977~RNA polymerase II regulatory region sequence-specific DNA binding	3	20	0.0131502	FOSL1, JUNB, FOSL2	15	221	17446	15.7882	0.577022	0.106846	0.0953393
GOTERM_MF_DIRECT	GO:0000982~transcription factor activity, RNA polymerase II core promoter proximal region sequence-specific binding	2	13.3333	0.0190952	FOSL1, FOSL2	15	24	17446	96.9222	0.714408	0.12486	0.111414
GOTERM_MF_DIRECT	GO:0001077~transcriptional activator activity, RNA polymerase II core promoter proximal region sequence-specific binding	3	20	0.0192093	FOSL1, FOS, JUNB	15	270	17446	12.923	0.716559	0.12486	0.111414
GOTERM_MF_DIRECT	GO:0001968~fibronectin binding	2	13.3333	0.0230305	IGFBP5, TNC	15	29	17446	80.2115	0.78008	0.136089	0.121434
GOTERM_MF_DIRECT	GO:0003700~transcription factor activity, sequence-specific DNA binding	4	26.6667	0.0309535	FOSL1, FOS, JUNB, FOSL2	15	883	17446	5.26871	0.870461	0.167665	0.149609
GOTERM_CC_DIRECT	GO:0070062~extracellular exosome	8	53.3333	0.00121835	GNPDA1, ITIH2, CSF1, TXNRD1, SPP1, AKR1C18, TIMP1, AKR1B8	15	2674	19662	3.92162	0.0429383	0.0438606	0.0438606
GOTERM_CC_DIRECT	GO:0005576~extracellular region	6	40	0.00564871	ITIH2, CSF1, IGFBP5, TNC, SPP1, TIMP1	15	1753	19662	4.48648	0.184481	0.101677	0.101677
GOTERM_BP_DIRECT	GO:0034097~response to cytokine	4	26.6667	3.04205e-05	FOSL1, TIMP1, FOS, JUNB	15	81	18082	59.5292	0.00636804	0.00317894	0.00301163
GOTERM_BP_DIRECT	GO:0007565~female pregnancy	4	26.6667	3.04205e-05	FOSL1, IGFBP5, AKR1C18, FOS	15	81	18082	59.5292	0.00636804	0.00317894	0.00301163
GOTERM_BP_DIRECT	GO:0001649~osteoblast differentiation	4	26.6667	8.22683e-05	IGFBP5, TNC, SPP1, JUNB	15	113	18082	42.6714	0.0171287	0.00573136	0.00542971
GOTERM_BP_DIRECT	GO:0051591~response to cAMP	3	20	0.000694541	FOSL1, FOS, JUNB	15	51	18082	70.9098	0.13576	0.0313494	0.0296994
GOTERM_BP_DIRECT	GO:0071277~cellular response to calcium ion	3	20	0.000749985	AKR1C18, FOS, JUNB	15	53	18082	68.234	0.145771	0.0313494	0.0296994
GOTERM_BP_DIRECT	GO:0009612~response to mechanical stimulus	3	20	0.00105824	FOSL1, TNC, JUNB	15	63	18082	57.4032	0.199364	0.0368621	0.034922
GOTERM_BP_DIRECT	GO:0016488~farnesol catabolic process	2	13.3333	0.00154794	AKR1C18, AKR1B8	15	2	18082	1205.47	0.277704	0.0462172	0.0437847
GOTERM_BP_DIRECT	GO:0006357~regulation of transcription from RNA polymerase II promoter	4	26.6667	0.00319312	FOSL1, FOS, JUNB, FOSL2	15	397	18082	12.1458	0.489124	0.0834203	0.0790297
GOTERM_BP_DIRECT	GO:0071799~cellular response to prostaglandin D stimulus	2	13.3333	0.00386569	TNC, AKR1C18	15	5	18082	482.187	0.556638	0.0863023	0.0817601
GOTERM_BP_DIRECT	GO:0044598~doxorubicin metabolic process	2	13.3333	0.00463716	AKR1C18, AKR1B8	15	6	18082	401.822	0.623211	0.0863023	0.0817601
GOTERM_BP_DIRECT	GO:0044597~daunorubicin metabolic process	2	13.3333	0.00463716	AKR1C18, AKR1B8	15	6	18082	401.822	0.623211	0.0863023	0.0817601
GOTERM_BP_DIRECT	GO:0006366~transcription from RNA polymerase II promoter	3	20	0.00495516	FOS, JUNB, FOSL2	15	138	18082	26.2058	0.647664	0.0863023	0.0817601
GOTERM_BP_DIRECT	GO:0009629~response to gravity	2	13.3333	0.00540808	FOSL1, FOS	15	7	18082	344.419	0.67979	0.0869452	0.0823692
GOTERM_BP_DIRECT	GO:0008284~positive regulation of cell proliferation	4	26.6667	0.00761753	CSF1, TNC, AKR1C18, TIMP1	15	542	18082	8.89643	0.799272	0.106998	0.101366
GOTERM_BP_DIRECT	GO:0007568~aging	3	20	0.00767927	IGFBP5, TIMP1, FOS	15	173	18082	20.904	0.801878	0.106998	0.101366
GOTERM_BP_DIRECT	GO:0051412~response to corticosterone	2	13.3333	0.0161429	FOSL1, FOS	15	21	18082	114.806	0.967211	0.207838	0.196899
GOTERM_BP_DIRECT	GO:0031668~cellular response to extracellular stimulus	2	13.3333	0.0169055	FOSL1, FOS	15	22	18082	109.588	0.972138	0.207838	0.196899
GOTERM_BP_DIRECT	GO:0034614~cellular response to reactive oxygen species	2	13.3333	0.0184291	AKR1C18, FOS	15	24	18082	100.456	0.979884	0.211091	0.199981
GOTERM_BP_DIRECT	GO:0045672~positive regulation of osteoclast differentiation	2	13.3333	0.0191901	CSF1, FOS	15	25	18082	96.4373	0.982907	0.211091	0.199981
GOTERM_BP_DIRECT	GO:0030316~osteoclast differentiation	2	13.3333	0.0222286	CSF1, JUNB	15	29	18082	83.1356	0.991091	0.228774	0.216733
GOTERM_BP_DIRECT	GO:0032570~response to progesterone	2	13.3333	0.0229869	FOSL1, FOS	15	30	18082	80.3644	0.99243	0.228774	0.216733
GOTERM_BP_DIRECT	GO:0042493~response to drug	3	20	0.027484	FOSL1, FOS, JUNB	15	339	18082	10.6678	0.997127	0.261098	0.247356
GOTERM_BP_DIRECT	GO:0032870~cellular response to hormone stimulus	2	13.3333	0.035794	FOS, JUNB	15	47	18082	51.2965	0.999526	0.318224	0.301475
GOTERM_BP_DIRECT	GO:0010942~positive regulation of cell death	2	13.3333	0.0365424	TXNRD1, AKR1C18	15	48	18082	50.2278	0.999597	0.318224	0.301475
GOTERM_BP_DIRECT	GO:0045944~positive regulation of transcription from RNA polymerase II promoter	4	26.6667	0.0383537	FOSL1, FOS, JUNB, FOSL2	15	995	18082	4.8461	0.999729	0.320637	0.303762
GOTERM_CC_DIRECT	GO:0005604~basement membrane	2	13.3333	0.066917	TNC, TIMP1	15	97	19662	27.0268	0.917371	0.775783	0.775783
GOTERM_BP_DIRECT	GO:0042060~wound healing	2	13.3333	0.0703952	TNC, TIMP1	15	94	18082	25.6482	1	0.541639	0.513132
GOTERM_BP_DIRECT	GO:0001503~ossification	2	13.3333	0.0718417	CSF1, SPP1	15	96	18082	25.1139	1	0.541639	0.513132
GOTERM_BP_DIRECT	GO:0051897~positive regulation of protein kinase B signaling	2	13.3333	0.0725641	IGFBP5, AKR1C18	15	97	18082	24.855	1	0.541639	0.513132
GOTERM_MF_DIRECT	GO:0016491~oxidoreductase activity	3	20	0.0827399	TXNRD1, AKR1C18, AKR1B8	15	604	17446	5.77682	0.996352	0.4137	0.369147
GOTERM_CC_DIRECT	GO:0005615~extracellular space	4	26.6667	0.0861981	CSF1, TNC, SPP1, TIMP1	15	1504	19662	3.48617	0.961035	0.775783	0.775783
GOTERM_BP_DIRECT	GO:0010466~negative regulation of peptidase activity	2	13.3333	0.0869042	ITIH2, TIMP1	15	117	18082	20.6063	1	0.626309	0.593346
KEGG_PATHWAY	mmu04151:PI3K-Akt signaling pathway	3	20	0.0870185	CSF1, TNC, SPP1	12	351	7691	5.47792	0.978152	0.970481	0.970481
GOTERM_MF_DIRECT	GO:0030414~peptidase inhibitor activity	2	13.3333	0.0943399	ITIH2, TIMP1	15	123	17446	18.9117	0.998405	0.438007	0.390837
GOTERM_BP_DIRECT	GO:0055114~oxidation-reduction process	3	20	0.0944065	TXNRD1, AKR1C18, AKR1B8	15	676	18082	5.3497	1	0.657699	0.623083
