# Supplementary material for: Identification of hub genes and transcription factor-miRNA-mRNA pathways in mice and human renal ischemia-reperfusion injury
Source: PeerJ. 2021 Oct 26;9:e12375. doi: 10.7717/peerj.12375 (PMC8555504; doi:10.7717/peerj.12375)
Supplement: Supplemental Information 5 — Binding site, action type, tissue and the sources of evidence were provided. [file peerj-09-12375-s005.xlsx]

## Sheet: Predicted TFs
TF name	miRNA name	TSS	Binding site	Action type	SRAID/PMID	Evidence	Tissue	Species
Akt1	mmu-mir-21	n/a	n/a	Activation	20404348	literature	n/a	M.musculus
Bcl6	mmu-mir-21	n/a	n/a	Repression	23416424	literature	n/a	M.musculus
Cebpa	mmu-mir-21	n/a	n/a	Activation	24421386	literature	n/a	M.musculus
Cebpb	mmu-mir-21	n/a	n/a	Activation	27430527	literature	n/a	M.musculus
Gfi1	mmu-mir-21	n/a	n/a	Repression	19278956	literature	n/a	M.musculus
Grhl3	mmu-mir-21	n/a	n/a	Repression	22614019	literature	n/a	M.musculus
Jun	mmu-mir-21	n/a	n/a	Activation	25898844	literature	n/a	M.musculus
Nfkb1	mmu-mir-21	n/a	n/a	Activation	25000291	literature	n/a	M.musculus
Rela	mmu-mir-21	n/a	n/a	Activation	25130469	literature	n/a	M.musculus
Rest	mmu-mir-21	n/a	n/a	Repression	26209818	literature	n/a	M.musculus
Smad2	mmu-mir-21	n/a	n/a	Activation	25887159	literature	n/a	M.musculus
Smad3	mmu-mir-21	n/a	n/a	Activation	25887159	literature	n/a	M.musculus
Smad4	mmu-mir-21	n/a	n/a	Regulation	25130469	literature	n/a	M.musculus
Spi1	mmu-mir-21	n/a	n/a	Activation	24421386	literature	n/a	M.musculus
Stat3	mmu-mir-21	n/a	n/a	Activation	27430527	literature	n/a	M.musculus
Stat5a	mmu-mir-21	n/a	n/a	Activation	24497923	literature	n/a	M.musculus
Aff3	mmu-mir-146b	chr19: 46342762	chr19: 46338588-46338844(score=1000)	Regulation	SRX823725	level 1	Pluripotent stem cell	M.musculus
Atf4	mmu-mir-146b	chr19: 46342762	chr19: 46339845-46339986(score=579)	Regulation	SRX122494	level 1	Blood	M.musculus
Bcl11b	mmu-mir-146b	chr19: 46342762	chr19: 46338188-46338449(score=317)	Regulation	SRX2399084	level 1	Blood	M.musculus
Bhlhe40	mmu-mir-146b	chr19: 46342762	chr19: 46338556-46338832(score=283)	Regulation	SRX140385	level 1	Blood	M.musculus
Brd4	mmu-mir-146b	chr19: 46342762	chr19: 46338628-46338726(score=443)	Regulation	SRX2836972	level 1	Adipocyte	M.musculus
Cbfb	mmu-mir-146b	chr19: 46342762	chr19: 46338304-46338876(score=693)	Regulation	SRX2389674	level 1	Blood	M.musculus
Cebpa	mmu-mir-146b	chr19: 46342762	chr19: 46339857-46339976(score=890)	Regulation	SRX1357065	level 1	Adipocyte	M.musculus
Cebpb	mmu-mir-146b	chr19: 46342762	chr19: 46339875-46339978(score=653)	Regulation	SRX341415	level 1	Adipocyte	M.musculus
Cebpd	mmu-mir-146b	chr19: 46342762	chr19: 46339752-46340071(score=1000)	Regulation	SRX2901284	level 1	Blood	M.musculus
Cebpe	mmu-mir-146b	chr19: 46342762	chr19: 46339773-46340105(score=1000)	Regulation	SRX1318193	level 1	Blood	M.musculus
Chd2	mmu-mir-146b	chr19: 46342762	chr19: 46338559-46338845(score=994)	Regulation	SRX140392	level 1	Blood	M.musculus
Chd4	mmu-mir-146b	chr19: 46342762	chr19: 46338458-46338689(score=403)	Regulation	SRX1815523	level 1	Blood	M.musculus
Creb1	mmu-mir-146b	chr19: 46342762	chr19: 46338609-46338855(score=547)	Regulation(feedback)	SRX1521009	level 1	Adipocyte	M.musculus
Ctcf	mmu-mir-146b	chr19: 46342762	chr19: 46338748-46338888(score=920)	Regulation	SRX1357086	level 1	Adipocyte	M.musculus
Dr1	mmu-mir-146b	chr19: 46342762	chr19: 46342101-46342645(score=351)	Regulation	SRX2609733	level 1	Pluripotent stem cell	M.musculus
E2f4	mmu-mir-146b	chr19: 46342762	chr19: 46338560-46338824(score=373)	Regulation	SRX140377	level 1	Blood	M.musculus
Ebf2	mmu-mir-146b	chr19: 46342762	chr19: 46339504-46339641(score=675)	Regulation	SRX1357069	level 1	Adipocyte	M.musculus
Egr2	mmu-mir-146b	chr19: 46341121	chr19: 46340851-46341198(score=1000)	Regulation	SRX270570	level 2	Blood	M.musculus
Elf4	mmu-mir-146b	chr19: 46342762	chr19: 46339285-46339604(score=410)	Regulation	SRX2242849	level 1	Blood	M.musculus
Elf5	mmu-mir-146b	chr19: 46342762	chr19: 46338888-46339052(score=530)	Regulation	SRX1672063	level 1	Breast	M.musculus
Ell3	mmu-mir-146b	chr19: 46342762	chr19: 46338642-46338791(score=421)	Regulation	SRX149001	level 1	Pluripotent stem cell	M.musculus
Ep300	mmu-mir-146b	chr19: 46342762	chr19: 46338662-46338736(score=301)	Regulation	SRX1357129	level 1	Adipocyte	M.musculus
Erf	mmu-mir-146b	chr19: 46342762	chr19: 46338562-46338772(score=492)	Regulation	SRX209937	level 1	Embryonic fibroblast	M.musculus
Erg	mmu-mir-146b	chr19: 46342762	chr19: 46338632-46338976(score=517)	Regulation	SRX884089	level 1	Blood	M.musculus
Esr1	mmu-mir-146b	chr19: 46342762	chr19: 46338513-46338760(score=390)	Regulation	SRX2548308	level 1	Uterus	M.musculus
Ets1	mmu-mir-146b	chr19: 46342762	chr19: 46338572-46338880(score=569)	Regulation	SRX188797	level 1	Blood	M.musculus
Fli1	mmu-mir-146b	chr19: 46341121	chr19: 46340917-46341079(score=735)	Regulation	SRX310201	level 2	Blood	M.musculus
Foxp3	mmu-mir-146b	chr19: 46342762	chr19: 46338607-46338841(score=487)	Regulation	SRX2341417	level 1	Blood	M.musculus
Gata1	mmu-mir-146b	chr19: 46342762	chr19: 46338536-46338805(score=1000)	Regulation	SRX188828	level 1	Blood	M.musculus
Gata2	mmu-mir-146b	chr19: 46342762	chr19: 46338504-46338739(score=894)	Regulation	SRX206424	level 1	Blood	M.musculus
Gata4	mmu-mir-146b	chr19: 46342762	chr19: 46338545-46338719(score=440)	Regulation	SRX373595	level 1	Cardiovascular	M.musculus
Hcfc1	mmu-mir-146b	chr19: 46342762	chr19: 46338414-46338938(score=1000)	Regulation	SRX188798	level 1	Blood	M.musculus
Hdac1	mmu-mir-146b	chr19: 46342762	chr19: 46338504-46338777(score=576)	Regulation	SRX1815525	level 1	Blood	M.musculus
Hdac2	mmu-mir-146b	chr19: 46341121	chr19: 46340857-46341046(score=365)	Regulation	SRX1815513	level 2	Blood	M.musculus
Hdac3	mmu-mir-146b	chr19: 46342762	chr19: 46338565-46338861(score=477)	Regulation	SRX1890321	level 1	Adipocyte	M.musculus
Hnf4a	mmu-mir-146b	chr19: 46342762	chr19: 46342175-46342858(score=548)	Regulation	SRX547094	level 1	Liver	M.musculus
Ikzf1	mmu-mir-146b	chr19: 46342762	chr19: 46338554-46338737(score=316)	Regulation	SRX692974	level 1	Blood	M.musculus
Insm1	mmu-mir-146b	chr19: 46342762	chr19: 46338557-46338812(score=537)	Regulation	SRX445033	level 1	Pancreas	M.musculus
Junb	mmu-mir-146b	chr19: 46341121	chr19: 46340873-46341127(score=353)	Regulation	SRX2901293	level 2	Blood	M.musculus
Jund	mmu-mir-146b	chr19: 46341121	chr19: 46340856-46341083(score=354)	Regulation	SRX2901298	level 2	Blood	M.musculus
Kat2a	mmu-mir-146b	chr19: 46342762	chr19: 46338548-46338879(score=1000)	Regulation	SRX188824	level 1	Blood	M.musculus
Kdm4c	mmu-mir-146b	chr19: 46342762	chr19: 46338401-46338655(score=412)	Regulation	SRX1755829	level 1	Blood	M.musculus
Kdm5a	mmu-mir-146b	chr19: 46342762	chr19: 46338393-46338754(score=889)	Regulation	SRX1949146	level 1	Embryonic fibroblast	M.musculus
Klf3	mmu-mir-146b	chr19: 46342762	chr19: 46338608-46338766(score=518)	Regulation	SRX248398	level 1	Embryonic fibroblast	M.musculus
Kmt2a	mmu-mir-146b	chr19: 46342762	chr19: 46338465-46338760(score=578)	Regulation	SRX1815514	level 1	Blood	M.musculus
Kmt2b	mmu-mir-146b	chr19: 46342762	chr19: 46338567-46338834(score=503)	Regulation	SRX2152805	level 1	Pluripotent stem cell	M.musculus
Max	mmu-mir-146b	chr19: 46342762	chr19: 46338420-46338830(score=510)	Regulation	SRX140382	level 1	Blood	M.musculus
Maz	mmu-mir-146b	chr19: 46342762	chr19: 46338538-46338835(score=1000)	Regulation	SRX188810	level 1	Blood	M.musculus
Mbd3	mmu-mir-146b	chr19: 46342762	chr19: 46338168-46338332(score=328)	Regulation	ERX080476	level 1	Pluripotent stem cell	M.musculus
Med1	mmu-mir-146b	chr19: 46342762	chr19: 46338626-46338849(score=388)	Regulation	SRX1403505	level 1	Blood	M.musculus
Meis1	mmu-mir-146b	chr19: 46342762	chr19: 46338998-46339142(score=492)	Regulation	SRX475273	level 1	Blood	M.musculus
Msl2	mmu-mir-146b	chr19: 46342762	chr19: 46338591-46338796(score=402)	Regulation	SRX368310	level 1	Pluripotent stem cell	M.musculus
Mxi1	mmu-mir-146b	chr19: 46342762	chr19: 46338428-46338869(score=794)	Regulation	SRX140391	level 1	Blood	M.musculus
Myb	mmu-mir-146b	chr19: 46342762	chr19: 46338613-46338736(score=333)	Regulation	SRX140366	level 1	Blood	M.musculus
Myc	mmu-mir-146b	chr19: 46342762	chr19: 46338557-46338864(score=490)	Regulation	SRX140397	level 1	Blood	M.musculus
Nelfa	mmu-mir-146b	chr19: 46342762	chr19: 46338515-46338660(score=305)	Regulation	SRX017058	level 1	Pluripotent stem cell	M.musculus
Nelfe	mmu-mir-146b	chr19: 46342762	chr19: 46338461-46338679(score=908)	Regulation	SRX140395	level 1	Blood	M.musculus
Nfib	mmu-mir-146b	chr19: 46342762	chr19: 46339321-46339492(score=506)	Regulation	SRX1672030	level 1	Breast	M.musculus
Nr1d1	mmu-mir-146b	chr19: 46342762	chr19: 46338623-46338814(score=315)	Regulation	SRX1630248	level 1	Adipocyte	M.musculus
Nr1d2	mmu-mir-146b	chr19: 46342762	chr19: 46338687-46338848(score=1000)	Regulation	SRX128174	level 1	Liver	M.musculus
Nr3c1	mmu-mir-146b	chr19: 46342762	chr19: 46338581-46338890(score=1000)	Regulation	SRX821805	level 1	Adipocyte	M.musculus
Nrf1	mmu-mir-146b	chr19: 46342762	chr19: 46338496-46338760(score=627)	Regulation	SRX994816	level 1	Pluripotent stem cell	M.musculus
Nsd3	mmu-mir-146b	chr19: 46342762	chr19: 46339681-46339992(score=366)	Regulation	SRX1114542	level 1	Blood	M.musculus
Pgr	mmu-mir-146b	n/a	n/a	Regulation	25236432	literature	n/a	M.musculus
Pou2f1	mmu-mir-146b	chr19: 46342762	chr19: 46338611-46338810(score=329)	Regulation	SRX877595	level 1	Blood	M.musculus
Pou5f1	mmu-mir-146b	chr19: 46342762	chr19: 46338573-46338760(score=278)	Regulation	SRX499128	level 1	Pluripotent stem cell	M.musculus
Pparg	mmu-mir-146b	chr19: 46342762	chr19: 46338586-46338770(score=497)	Regulation	SRX202796	level 1	Embryonic fibroblast	M.musculus
Prdm16	mmu-mir-146b	chr19: 46342762	chr19: 46341109-46341262(score=377)	Regulation	SRX2044195	level 1	Adipocyte	M.musculus
Rad21	mmu-mir-146b	chr19: 46342762	chr19: 46338630-46338950(score=1000)	Regulation	SRX140396	level 1	Blood	M.musculus
Rag2	mmu-mir-146b	chr19: 46342762	chr19: 46338263-46338748(score=747)	Regulation	SRX1046541	level 1	Blood	M.musculus
Rbfox2	mmu-mir-146b	chr19: 46342762	chr19: 46338564-46338710(score=354)	Regulation	SRX551542	level 1	Cardiovascular	M.musculus
Rcor1	mmu-mir-146b	chr19: 46342762	chr19: 46338574-46338860(score=531)	Regulation(feedback)	SRX188809	level 1	Blood	M.musculus
Rela	mmu-mir-146b	chr19: 46341121	chr19: 46340832-46341199(score=1000)	Regulation	SRX1650088	level 2	Blood	M.musculus
Rnf2	mmu-mir-146b	chr19: 46341121	chr19: 46340877-46341151(score=456)	Regulation	SRX105448	level 2	Blood	M.musculus
Runx1	mmu-mir-146b	chr19: 46341121	chr19: 46340882-46341136(score=1000)	Regulation	SRX310206	level 2	Blood	M.musculus
Rxra	mmu-mir-146b	chr19: 46342762	chr19: 46338540-46338895(score=459)	Regulation	SRX423962	level 1	Bone	M.musculus
Sap130	mmu-mir-146b	chr19: 46342762	chr19: 46338400-46338644(score=454)	Regulation	SRX1568882	level 1	Embryo	M.musculus
Sin3a	mmu-mir-146b	chr19: 46342762	chr19: 46338400-46338903(score=1000)	Regulation	SRX188800	level 1	Blood	M.musculus
Smarca4	mmu-mir-146b	chr19: 46341121	chr19: 46340822-46341108(score=575)	Regulation	SRX1815508	level 2	Blood	M.musculus
Smc1a	mmu-mir-146b	chr19: 46342762	chr19: 46338702-46338964(score=690)	Regulation	SRX976734	level 1	Embryonic fibroblast	M.musculus
Smc3	mmu-mir-146b	chr19: 46342762	chr19: 46338709-46339045(score=414)	Regulation	SRX2580290	level 1	Blood	M.musculus
Snai1	mmu-mir-146b	chr19: 46342762	chr19: 46338541-46338663(score=436)	Regulation	SRX695880	level 1	Breast	M.musculus
Sp1	mmu-mir-146b	chr19: 46342762	chr19: 46338597-46338743(score=369)	Regulation(feedback)	SRX378972	level 1	Pluripotent stem cell	M.musculus
Spi1	mmu-mir-146b	chr19: 46342762	chr19: 46338477-46338872(score=1000)	Regulation	SRX1583886	level 1	Blood	M.musculus
Srf	mmu-mir-146b	chr19: 46342762	chr19: 46338743-46338890(score=453)	Regulation	SRX180899	level 1	Embryonic fibroblast	M.musculus
Stat1	mmu-mir-146b	chr19: 46342762	chr19: 46339797-46340117(score=947)	Regulation	SRX2417352	level 1	Blood	M.musculus
Stat3	mmu-mir-146b	chr19: 46342762	chr19: 46339875-46340006(score=535)	Regulation	SRX2088126	level 1	Breast	M.musculus
Stat5a	mmu-mir-146b	chr19: 46341121	chr19: 46340908-46341197(score=720)	Regulation	SRX1655663	level 2	Blood	M.musculus
Stat5b	mmu-mir-146b	chr19: 46341121	chr19: 46340924-46341087(score=629)	Regulation	SRX041332	level 2	Blood	M.musculus
Stat6	mmu-mir-146b	n/a	n/a	Activation	27780686	literature	n/a	M.musculus
Tbp	mmu-mir-146b	chr19: 46342762	chr19: 46338511-46338831(score=322)	Regulation	SRX140376	level 1	Blood	M.musculus
Tbx5	mmu-mir-146b	chr19: 46342762	chr19: 46338583-46338791(score=532)	Regulation	SRX2978811	level 1	Embryo	M.musculus
Tcf3	mmu-mir-146b	chr19: 46342762	chr19: 46338465-46338795(score=1000)	Regulation	SRX1080393	level 1	Pluripotent stem cell	M.musculus
Tcf4	mmu-mir-146b	chr19: 46342762	chr19: 46338461-46338819(score=1000)	Regulation	SRX856963	level 1	Digestive tract	M.musculus
Tcf7	mmu-mir-146b	chr19: 46342762	chr19: 46338583-46338730(score=1000)	Regulation(feedback)	SRX092472	level 1	Blood	M.musculus
Tfap2a	mmu-mir-146b	chr19: 46342762	chr19: 46338350-46338640(score=321)	Regulation	SRX1225080	level 1	Epidermis	M.musculus
Tgif1	mmu-mir-146b	chr19: 46342762	chr19: 46338986-46339172(score=966)	Regulation	SRX475271	level 1	Blood	M.musculus
Usf1	mmu-mir-146b	chr19: 46342762	chr19: 46338310-46338487(score=865)	Regulation	SRX142513	level 1	Muscle	M.musculus
Usf2	mmu-mir-146b	chr19: 46342762	chr19: 46338343-46338492(score=393)	Regulation	SRX188805	level 1	Blood	M.musculus
Vdr	mmu-mir-146b	chr19: 46342762	chr19: 46338499-46338881(score=496)	Regulation	SRX423950	level 1	Bone	M.musculus
Wdr5	mmu-mir-146b	chr19: 46342762	chr19: 46338512-46338892(score=1000)	Regulation	SRX1815529	level 1	Blood	M.musculus
Yy1	mmu-mir-146b	chr19: 46342762	chr19: 46338632-46338766(score=544)	Regulation	SRX186172	level 1	Blood	M.musculus
Zc3h11a	mmu-mir-146b	chr19: 46342762	chr19: 46338765-46338881(score=364)	Regulation	SRX188796	level 1	Blood	M.musculus
Zfp281	mmu-mir-146b	chr19: 46342762	chr19: 46338473-46338747(score=946)	Regulation(feedback)	SRX1540623	level 1	Pluripotent stem cell	M.musculus
Zfp384	mmu-mir-146b	chr19: 46342762	chr19: 46338689-46338815(score=304)	Regulation	SRX188817	level 1	Blood	M.musculus
Zic1	mmu-mir-146b	chr19: 46342762	chr19: 46338389-46338677(score=391)	Regulation	SRX685920	level 1	Neural	M.musculus
Zmiz1	mmu-mir-146b	chr19: 46342762	chr19: 46338529-46338643(score=330)	Regulation	SRX188818	level 1	Blood	M.musculus
Brd4	mmu-mir-223	chrX: 96239942	chrX: 96239694-96239816(score=402)	Regulation	SRX884070	level 2	Blood	M.musculus
Cebpa	mmu-mir-223	chrX: 96239942	chrX: 96239650-96239888(score=1000)	Regulation	SRX344359	level 2	Blood	M.musculus
Cebpb	mmu-mir-223	chrX: 96239942	chrX: 96239644-96239928(score=1000)	Regulation	SRX1939437	level 2	Blood	M.musculus
Cebpd	mmu-mir-223	chrX: 96239942	chrX: 96239651-96239843(score=348)	Regulation	SRX2901282	level 2	Blood	M.musculus
Cebpe	mmu-mir-223	chrX: 96239942	chrX: 96239653-96239910(score=619)	Regulation	SRX1318193	level 2	Blood	M.musculus
Elf4	mmu-mir-223	chrX: 96239926(NR_030718)	chrX: 96239468-96239909(score=942)	Regulation	SRX2242849	level 1	Blood	M.musculus
Ep300	mmu-mir-223	chrX: 96239942	chrX: 96239642-96240010(score=953)	Regulation	SRX884083	level 2	Blood	M.musculus
Erg	mmu-mir-223	chrX: 96239942	chrX: 96239687-96239890(score=357)	Regulation	SRX1939438	level 2	Blood	M.musculus
Ets1	mmu-mir-223	chrX: 96239942	chrX: 96239745-96239907(score=506)	Regulation(feedback)	SRX188797	level 2	Blood	M.musculus
Fli1	mmu-mir-223	chrX: 96239942	chrX: 96239678-96239916(score=756)	Regulation	SRX2242845	level 2	Blood	M.musculus
Gata1	mmu-mir-223	chrX: 96239942	chrX: 96239742-96239912(score=731)	Regulation	SRX140370	level 2	Blood	M.musculus
Gata3	mmu-mir-223	n/a	n/a	Activation	27837403	literature	n/a	M.musculus
Hdac2	mmu-mir-223	chrX: 96239942	chrX: 96239666-96239942(score=405)	Regulation	SRX1815527	level 2	Blood	M.musculus
Hnf1b	mmu-mir-223	n/a	n/a	Regulation	27059371	literature	n/a	M.musculus
Hoxb4	mmu-mir-223	chrX: 96239926(NR_030718)	chrX: 96235922-96236073(score=900)	Regulation	SRX109459	level 1	Pluripotent stem cell	M.musculus
Il1b	mmu-mir-223	n/a	n/a	Regulation	22937006	literature	n/a	M.musculus
Il6	mmu-mir-223	n/a	n/a	Regulation(feedback)	22937006	literature	n/a	M.musculus
Junb	mmu-mir-223	chrX: 96239942	chrX: 96239651-96239881(score=505)	Regulation	SRX2901293	level 2	Blood	M.musculus
Jund	mmu-mir-223	chrX: 96239942	chrX: 96239643-96239914(score=403)	Regulation	SRX2901295	level 2	Blood	M.musculus
Kdm1a	mmu-mir-223	chrX: 96239942	chrX: 96239713-96239876(score=549)	Regulation	SRX181863	level 2	Blood	M.musculus
Kmt2a	mmu-mir-223	chrX: 96239942	chrX: 96239718-96239984(score=392)	Regulation	SRX1815528	level 2	Blood	M.musculus
Lmo2	mmu-mir-223	chrX: 96239942	chrX: 96239711-96239916(score=828)	Regulation	SRX310203	level 2	Blood	M.musculus
Lyl1	mmu-mir-223	chrX: 96239942	chrX: 96239672-96239959(score=880)	Regulation	SRX1939445	level 2	Blood	M.musculus
Mafb	mmu-mir-223	chrX: 96239926(NR_030718)	chrX: 96238325-96238540(score=704)	Regulation	SRX1465586	level 1	Blood	M.musculus
Max	mmu-mir-223	chrX: 96239942	chrX: 96239789-96239936(score=459)	Regulation	SRX140382	level 2	Blood	M.musculus
Med1	mmu-mir-223	chrX: 96239942	chrX: 96239649-96239949(score=368)	Regulation	SRX1403505	level 2	Blood	M.musculus
Meis1	mmu-mir-223	chrX: 96239926(NR_030718)	chrX: 96235904-96236085(score=668)	Regulation	SRX475273	level 1	Blood	M.musculus
Nr3c1	mmu-mir-223	chrX: 96239942	chrX: 96239681-96239897(score=716)	Regulation	SRX821802	level 2	Adipocyte	M.musculus
Nsd3	mmu-mir-223	chrX: 96239942	chrX: 96239699-96239852(score=352)	Regulation	SRX1114542	level 2	Blood	M.musculus
Pparg	mmu-mir-223	n/a	n/a	Activation	26436647	literature	n/a	M.musculus
Rcor1	mmu-mir-223	chrX: 96239942	chrX: 96239731-96239888(score=435)	Regulation	SRX188809	level 2	Blood	M.musculus
Rela	mmu-mir-223	chrX: 96239942	chrX: 96239672-96239840(score=414)	Regulation	SRX1650085	level 2	Blood	M.musculus
Runx1	mmu-mir-223	chrX: 96239942	chrX: 96239738-96239952(score=510)	Regulation	SRX825830	level 2	Pluripotent stem cell	M.musculus
Sin3a	mmu-mir-223	chrX: 96239942	chrX: 96239758-96239915(score=379)	Regulation	SRX188800	level 2	Blood	M.musculus
Smarca4	mmu-mir-223	chrX: 96239942	chrX: 96239658-96239869(score=379)	Regulation	SRX1642501	level 2	Blood	M.musculus
Spi1	mmu-mir-223	chrX: 96239942	chrX: 96239651-96239947(score=552)	Regulation	SRX760019	level 2	Blood	M.musculus
Stat1	mmu-mir-223	chrX: 96239942	chrX: 96239648-96239926(score=1000)	Regulation	SRX109337	level 2	Blood	M.musculus
Tal1	mmu-mir-223	chrX: 96239942	chrX: 96239657-96240001(score=1000)	Regulation	SRX1939449	level 2	Blood	M.musculus
Tcf3	mmu-mir-223	chrX: 96239942	chrX: 96239725-96239847(score=295)	Regulation	SRX310197	level 2	Pluripotent stem cell	M.musculus
Trim33	mmu-mir-223	chrX: 96239942	chrX: 96239723-96239901(score=500)	Regulation	SRX886487	level 2	Blood	M.musculus
Hnf1b	mmu-mir-199a-3p	n/a	n/a	Regulation	27059371	literature	n/a	M.musculus
Atf3	mmu-mir-155	chr16: 84703333	chr16: 84703068-84703385(score=514)	Regulation	SRX2901303	level 2	Blood	M.musculus
Atrx	mmu-mir-155	chr16: 84713023(NR_132106)	chr16: 84710771-84710971(score=634)	Regulation	SRX2649460	level 1	Embryo	M.musculus
Bach2	mmu-mir-155	chr16: 84713023(NR_132106)	chr16: 84713270-84713474(score=668)	Regulation	SRX264235	level 1	Blood	M.musculus
Batf	mmu-mir-155	chr16: 84703333	chr16: 84703185-84703357(score=772)	Regulation	SRX187198	level 2	Blood	M.musculus
Batf3	mmu-mir-155	chr16: 84713023(NR_132106)	chr16: 84713164-84713436(score=1000)	Regulation	SRX956766	level 1	Blood	M.musculus
Bcl11b	mmu-mir-155	chr16: 84713023(NR_132106)	chr16: 84713341-84713526(score=309)	Regulation	SRX2399084	level 1	Blood	M.musculus
Bhlhe40	mmu-mir-155	chr16: 84703333	chr16: 84703179-84703424(score=916)	Regulation(feedback)	SRX140385	level 2	Blood	M.musculus
Cbfb	mmu-mir-155	chr16: 84703333	chr16: 84703137-84703411(score=389)	Regulation(feedback)	SRX2389674	level 2	Blood	M.musculus
Cebpa	mmu-mir-155	chr16: 84714140	chr16: 84714018-84714142(score=499)	Regulation	SRX884090	level 1	Blood	M.musculus
Cebpb	mmu-mir-155	chr16: 84713023(NR_132106)	chr16: 84712939-84713250(score=447)	Regulation(feedback)	SRX2901279	level 1	Blood	M.musculus
Ctcf	mmu-mir-155	chr16: 84714140	chr16: 84714121-84714317(score=354)	Regulation	SRX1815531	level 1	Blood	M.musculus
Elf4	mmu-mir-155	chr16: 84713023(NR_132106)	chr16: 84713151-84713528(score=425)	Regulation	SRX2242850	level 1	Blood	M.musculus
Ep300	mmu-mir-155	chr16: 84703333	chr16: 84703063-84703391(score=430)	Regulation(feedback)	SRX183956	level 2	Blood	M.musculus
Epop	mmu-mir-155	chr16: 84713023(NR_132106)	chr16: 84710823-84710889(score=406)	Regulation	SRX764230	level 1	Pluripotent stem cell	M.musculus
Erg	mmu-mir-155	chr16: 84703333	chr16: 84703270-84703370(score=528)	Regulation	SRX884089	level 2	Blood	M.musculus
Ets1	mmu-mir-155	chr16: 84713023(NR_132106)	chr16: 84713179-84713510(score=671)	Regulation(feedback)	SRX188794	level 1	Blood	M.musculus
Etv6	mmu-mir-155	chr16: 84703333	chr16: 84703281-84703430(score=528)	Regulation(feedback)	SRX187211	level 2	Blood	M.musculus
Fli1	mmu-mir-155	chr16: 84703333	chr16: 84703236-84703411(score=529)	Regulation	SRX1056338	level 2	Blood	M.musculus
Fos	mmu-mir-155	chr16: 84703333	chr16: 84703094-84703402(score=563)	Regulation(feedback)	SRX2901288	level 2	Blood	M.musculus
Fosl2	mmu-mir-155	chr16: 84703333	chr16: 84703195-84703369(score=647)	Regulation(feedback)	SRX187214	level 2	Blood	M.musculus
Gtf2b	mmu-mir-155	chr16: 84703333	chr16: 84703208-84703428(score=1000)	Regulation	SRX517512	level 2	Cardiovascular	M.musculus
Hdac2	mmu-mir-155	chr16: 84713023(NR_132106)	chr16: 84713205-84713545(score=573)	Regulation	SRX1815513	level 1	Blood	M.musculus
Hoxa13	mmu-mir-155	chr16: 84703333	chr16: 84703113-84703414(score=557)	Regulation	SRX1757411	level 2	Embryo	M.musculus
Ikzf1	mmu-mir-155	chr16: 84703333	chr16: 84703262-84703416(score=456)	Regulation	SRX205986	level 2	Blood	M.musculus
Irf1	mmu-mir-155	chr16: 84713023(NR_132106)	chr16: 84713010-84713387(score=770)	Regulation	SRX805966	level 1	Blood	M.musculus
Irf4	mmu-mir-155	chr16: 84703333	chr16: 84703103-84703433(score=1000)	Regulation(feedback)	SRX1131942	level 2	Blood	M.musculus
Irf8	mmu-mir-155	chr16: 84713023(NR_132106)	chr16: 84713082-84713407(score=842)	Regulation	SRX498818	level 1	Blood	M.musculus
Jun	mmu-mir-155	chr16: 84703333	chr16: 84703218-84703406(score=944)	Regulation(feedback)	SRX1281904	level 2	Bone	M.musculus
Junb	mmu-mir-155	chr16: 84713023(NR_132106)	chr16: 84712978-84713490(score=1000)	Regulation	SRX197290	level 1	Blood	M.musculus
Jund	mmu-mir-155	chr16: 84703333	chr16: 84703137-84703426(score=576)	Regulation	SRX2773923	level 2	Blood	M.musculus
Kmt2b	mmu-mir-155	chr16: 84703333	chr16: 84703119-84703420(score=257)	Regulation	SRX1602655	level 2	Pluripotent stem cell	M.musculus
Maf	mmu-mir-155	chr16: 84713023(NR_132106)	chr16: 84713269-84713479(score=571)	Regulation(feedback)	SRX288145	level 1	Blood	M.musculus
Maz	mmu-mir-155	chr16: 84703333	chr16: 84703199-84703315(score=362)	Regulation	SRX188821	level 2	Blood	M.musculus
Mbd3	mmu-mir-155	chr16: 84714140	chr16: 84714115-84714249(score=482)	Regulation	ERX080463	level 1	Pluripotent stem cell	M.musculus
Nanog	mmu-mir-155	chr16: 84713023(NR_132106)	chr16: 84710093-84710374(score=684)	Regulation	SRX1704897	level 1	Pluripotent stem cell	M.musculus
Nfkb1	mmu-mir-155	n/a	n/a	Repression	26538391	literature	n/a	M.musculus
Rad21	mmu-mir-155	chr16: 84714140	chr16: 84714002-84714310(score=304)	Regulation	SRX1815538	level 1	Blood	M.musculus
Rbpj	mmu-mir-155	n/a	n/a	Repression(feedback)	24996169	literature	n/a	M.musculus
Rela	mmu-mir-155	chr16: 84713023(NR_132106)	chr16: 84708658-84708853(score=635)	Regulation	SRX1650088	level 1	Blood	M.musculus
Smc3	mmu-mir-155	chr16: 84703333	chr16: 84703274-84703412(score=353)	Regulation	SRX1306536	level 2	Blood	M.musculus
Spi1	mmu-mir-155	chr16: 84713023(NR_132106)	chr16: 84708558-84708959(score=1000)	Regulation(feedback)	SRX498823	level 1	Blood	M.musculus
Stat1	mmu-mir-155	chr16: 84713023(NR_132106)	chr16: 84713197-84713389(score=507)	Regulation	SRX109339	level 1	Blood	M.musculus
Stat2	mmu-mir-155	chr16: 84713023(NR_132106)	chr16: 84713017-84713416(score=795)	Regulation	SRX805964	level 1	Blood	M.musculus
Stat3	mmu-mir-155	chr16: 84703333	chr16: 84703189-84703376(score=583)	Regulation	SRX865029	level 2	Blood	M.musculus
Stat5a	mmu-mir-155	chr16: 84703333	chr16: 84703071-84703345(score=571)	Regulation	SRX1176004	level 2	Blood	M.musculus
Stat5b	mmu-mir-155	chr16: 84703333	chr16: 84703057-84703378(score=1000)	Regulation	SRX3067406	level 2	Blood	M.musculus
Stat6	mmu-mir-155	chr16: 84703333	chr16: 84703101-84703337(score=492)	Regulation	SRX353407	level 2	Blood	M.musculus
Supt5	mmu-mir-155	chr16: 84703333	chr16: 84703313-84703429(score=433)	Regulation	SRX027109	level 2	Blood	M.musculus
Tbp	mmu-mir-155	chr16: 84703333	chr16: 84703228-84703380(score=678)	Regulation	SRX140363	level 2	Blood	M.musculus
Tcf3	mmu-mir-155	chr16: 84703333	chr16: 84703165-84703401(score=506)	Regulation	SRX1568859	level 2	Blood	M.musculus
Wdr5	mmu-mir-155	chr16: 84713023(NR_132106)	chr16: 84713218-84713530(score=570)	Regulation	SRX1815515	level 1	Blood	M.musculus
Zfp384	mmu-mir-155	chr16: 84703333	chr16: 84703069-84703301(score=704)	Regulation	SRX188816	level 2	Blood	M.musculus
Bcl11b	mmu-mir-15b	chr3: 69004738(NM_001356976)	chr3: 69004308-69004525(score=429)	Regulation(feedback)	SRX2487652	level 1	Blood	M.musculus
Bhlhe40	mmu-mir-15b	chr3: 69004738(NM_001356976)	chr3: 69005087-69005262(score=372)	Regulation	SRX140385	level 1	Blood	M.musculus
Brd2	mmu-mir-15b	chr3: 69004738(NM_001356976)	chr3: 69005001-69005227(score=380)	Regulation	SRX997153	level 1	Pluripotent stem cell	M.musculus
Brd4	mmu-mir-15b	chr3: 69004996	chr3: 69004916-69005069(score=406)	Regulation	SRX1403500	level 2	Blood	M.musculus
Btaf1	mmu-mir-15b	chr3: 69004738(NM_001356976)	chr3: 69004872-69005474(score=1000)	Regulation(feedback)	SRX2894851	level 1	Pluripotent stem cell	M.musculus
Cbfb	mmu-mir-15b	chr3: 69004738(NM_001356976)	chr3: 69004885-69005340(score=647)	Regulation(feedback)	SRX2389672	level 1	Blood	M.musculus
Cebpa	mmu-mir-15b	chr3: 69004738(NM_001356976)	chr3: 69004570-69004705(score=914)	Regulation	SRX1357065	level 1	Adipocyte	M.musculus
Cebpb	mmu-mir-15b	chr3: 69004738(NM_001356976)	chr3: 69004519-69004689(score=332)	Regulation	SRX2663109	level 1	Adipocyte	M.musculus
Cebpd	mmu-mir-15b	chr3: 69004738(NM_001356976)	chr3: 69004475-69004912(score=909)	Regulation	SRX2901284	level 1	Blood	M.musculus
Cebpe	mmu-mir-15b	chr3: 69004738(NM_001356976)	chr3: 69004317-69004819(score=1000)	Regulation	SRX1318197	level 1	Blood	M.musculus
Chd2	mmu-mir-15b	chr3: 69004996	chr3: 69004842-69005022(score=463)	Regulation(feedback)	SRX140389	level 2	Blood	M.musculus
Creb1	mmu-mir-15b	chr3: 69004996	chr3: 69004908-69005035(score=523)	Regulation(feedback)	SRX1521009	level 2	Adipocyte	M.musculus
Crebbp	mmu-mir-15b	chr3: 69004996	chr3: 69004874-69004990(score=340)	Regulation	SRX1357058	level 2	Adipocyte	M.musculus
Ctcf	mmu-mir-15b	chr3: 69004738(NM_001356976)	chr3: 69002867-69003033(score=640)	Regulation	SRX188804	level 1	Blood	M.musculus
Dmc1	mmu-mir-15b	chr3: 69009772	chr3: 69005017-69006411(score=885)	Regulation	SRX1452699	level 1	Gonad	M.musculus
Dr1	mmu-mir-15b	chr3: 69004738(NM_001356976)	chr3: 69004969-69005318(score=356)	Regulation(feedback)	SRX2609733	level 1	Pluripotent stem cell	M.musculus
E2f1	mmu-mir-15b	chr3: 69004738(NM_001356976)	chr3: 69004499-69005004(score=878)	Regulation	SRX1334844	level 1	Liver	M.musculus
E2f3	mmu-mir-15b	chr3: 69004996	chr3: 69004888-69004980(score=275)	Regulation(feedback)	SRX871671	level 2	Digestive tract	M.musculus
E2f4	mmu-mir-15b	chr3: 69004996	chr3: 69004865-69005011(score=450)	Regulation	SRX140377	level 2	Blood	M.musculus
Ebf1	mmu-mir-15b	chr3: 69004996	chr3: 69004701-69004936(score=489)	Regulation	SRX2162539	level 2	Blood	M.musculus
Ebf2	mmu-mir-15b	chr3: 69004996	chr3: 69004787-69004926(score=1000)	Regulation	SRX1357069	level 2	Adipocyte	M.musculus
Egr2	mmu-mir-15b	chr3: 69009772	chr3: 69005629-69006002(score=497)	Regulation	SRX270569	level 1	Blood	M.musculus
Ep300	mmu-mir-15b	chr3: 69004996	chr3: 69004907-69004986(score=362)	Regulation(feedback)	SRX1357129	level 2	Adipocyte	M.musculus
Erf	mmu-mir-15b	chr3: 69004738(NM_001356976)	chr3: 69004407-69004659(score=1000)	Regulation	SRX209937	level 1	Embryonic fibroblast	M.musculus
Erg	mmu-mir-15b	chr3: 69004996	chr3: 69004875-69005031(score=1000)	Regulation	SRX884089	level 2	Blood	M.musculus
Esr1	mmu-mir-15b	chr3: 69004738(NM_001356976)	chr3: 69004786-69005219(score=275)	Regulation	SRX2548308	level 1	Uterus	M.musculus
Fli1	mmu-mir-15b	chr3: 69004996	chr3: 69004773-69004956(score=1000)	Regulation	SRX310201	level 2	Blood	M.musculus
Foxa2	mmu-mir-15b	chr3: 69004738(NM_001356976)	chr3: 69004726-69005141(score=577)	Regulation	SRX287023	level 1	Embryo	M.musculus
Gabpa	mmu-mir-15b	chr3: 69004996	chr3: 69004849-69005018(score=479)	Regulation	ERX112979	level 2	Liver	M.musculus
Gata4	mmu-mir-15b	chr3: 69004738(NM_001356976)	chr3: 69004819-69005102(score=557)	Regulation	SRX191944	level 1	Pluripotent stem cell	M.musculus
Gfi1	mmu-mir-15b	chr3: 69009772	chr3: 69006002-69006218(score=484)	Regulation	SRX093162	level 1	Blood	M.musculus
Gtf3c1	mmu-mir-15b	chr3: 69004738(NM_001356976)	chr3: 69004946-69005375(score=392)	Regulation	SRX1688327	level 1	Pluripotent stem cell	M.musculus
Hcfc1	mmu-mir-15b	chr3: 69004996	chr3: 69004753-69005080(score=1000)	Regulation	SRX188798	level 2	Blood	M.musculus
Hdac1	mmu-mir-15b	chr3: 69004738(NM_001356976)	chr3: 69004719-69005357(score=1000)	Regulation	SRX1815525	level 1	Blood	M.musculus
Hdac2	mmu-mir-15b	chr3: 69004738(NM_001356976)	chr3: 69004935-69005186(score=567)	Regulation(feedback)	SRX1815527	level 1	Blood	M.musculus
Hoxb4	mmu-mir-15b	chr3: 69004738(NM_001356976)	chr3: 69004330-69004443(score=412)	Regulation	SRX109459	level 1	Pluripotent stem cell	M.musculus
Ikzf1	mmu-mir-15b	chr3: 69004996	chr3: 69004824-69005022(score=750)	Regulation(feedback)	SRX692974	level 2	Blood	M.musculus
Ino80	mmu-mir-15b	chr3: 69004738(NM_001356976)	chr3: 69004924-69005484(score=1000)	Regulation	SRX2609732	level 1	Pluripotent stem cell	M.musculus
Irf4	mmu-mir-15b	chr3: 69004738(NM_001356976)	chr3: 69004543-69005014(score=756)	Regulation(feedback)	SRX2162565	level 1	Blood	M.musculus
Kat2a	mmu-mir-15b	chr3: 69004996	chr3: 69004809-69005042(score=531)	Regulation	SRX1815524	level 2	Blood	M.musculus
Kat5	mmu-mir-15b	chr3: 69004738(NM_001356976)	chr3: 69004987-69005324(score=491)	Regulation	SRX1053802	level 1	Pluripotent stem cell	M.musculus
Kdm1a	mmu-mir-15b	chr3: 69004738(NM_001356976)	chr3: 69002955-69003093(score=700)	Regulation	SRX181863	level 1	Blood	M.musculus
Kdm2b	mmu-mir-15b	chr3: 69009772	chr3: 69006007-69006224(score=362)	Regulation	SRX186548	level 1	Pluripotent stem cell	M.musculus
Kdm5a	mmu-mir-15b	chr3: 69004738(NM_001356976)	chr3: 69004325-69004546(score=457)	Regulation	SRX1949146	level 1	Embryonic fibroblast	M.musculus
Kdm6a	mmu-mir-15b	chr3: 69004996	chr3: 69004767-69004901(score=278)	Regulation	SRX1684533	level 2	Breast	M.musculus
Kmt2a	mmu-mir-15b	chr3: 69004996	chr3: 69004817-69005094(score=366)	Regulation	SRX1815528	level 2	Blood	M.musculus
Kmt2d	mmu-mir-15b	chr3: 69004738(NM_001356976)	chr3: 69005305-69005402(score=440)	Regulation(feedback)	SRX339721	level 1	Adipocyte	M.musculus
Mbd3	mmu-mir-15b	chr3: 69004738(NM_001356976)	chr3: 69004688-69004854(score=1000)	Regulation	ERX080476	level 1	Pluripotent stem cell	M.musculus
Meis1	mmu-mir-15b	chr3: 69004738(NM_001356976)	chr3: 69004477-69004657(score=728)	Regulation	SRX475273	level 1	Blood	M.musculus
Men1	mmu-mir-15b	chr3: 69009772	chr3: 69005863-69006276(score=611)	Regulation	SRX415267	level 1	Blood	M.musculus
Myb	mmu-mir-15b	chr3: 69004996	chr3: 69004843-69005047(score=938)	Regulation(feedback)	SRX140366	level 2	Blood	M.musculus
Mybl1	mmu-mir-15b	chr3: 69004996	chr3: 69004896-69005026(score=508)	Regulation	SRX244353	level 2	Gonad	M.musculus
Myc	mmu-mir-15b	chr3: 69004996	chr3: 69004738-69005039(score=636)	Regulation	SRX353783	level 2	Blood	M.musculus
Nanog	mmu-mir-15b	chr3: 69004738(NM_001356976)	chr3: 69005153-69005298(score=548)	Regulation	ERX238066	level 1	Pluripotent stem cell	M.musculus
Ncapd3	mmu-mir-15b	chr3: 69004738(NM_001356976)	chr3: 69004475-69004632(score=537)	Regulation	SRX104386	level 1	Pluripotent stem cell	M.musculus
Ncaph2	mmu-mir-15b	chr3: 69004738(NM_001356976)	chr3: 69004849-69005378(score=385)	Regulation	SRX1688321	level 1	Pluripotent stem cell	M.musculus
Nelfa	mmu-mir-15b	chr3: 69004738(NM_001356976)	chr3: 69004971-69005119(score=386)	Regulation(feedback)	SRX017058	level 1	Pluripotent stem cell	M.musculus
Nelfe	mmu-mir-15b	chr3: 69004738(NM_001356976)	chr3: 69004757-69005125(score=951)	Regulation	SRX140395	level 1	Blood	M.musculus
Neurod1	mmu-mir-15b	chr3: 69004996	chr3: 69004916-69005075(score=352)	Regulation	SRX445034	level 2	Pancreas	M.musculus
Nr3c1	mmu-mir-15b	chr3: 69004996	chr3: 69004823-69004999(score=516)	Regulation	SRX821805	level 2	Adipocyte	M.musculus
Nrf1	mmu-mir-15b	chr3: 69004996	chr3: 69004715-69005001(score=1000)	Regulation(feedback)	SRX1280435	level 2	Pluripotent stem cell	M.musculus
Nsd3	mmu-mir-15b	chr3: 69004738(NM_001356976)	chr3: 69004767-69005172(score=1000)	Regulation	SRX1114542	level 1	Blood	M.musculus
Otx2	mmu-mir-15b	chr3: 69004738(NM_001356976)	chr3: 69004934-69005334(score=444)	Regulation	SRX499143	level 1	Pluripotent stem cell	M.musculus
Pbx1	mmu-mir-15b	chr3: 69004738(NM_001356976)	chr3: 69004455-69004704(score=512)	Regulation	SRX1482287	level 1	Muscle	M.musculus
Pitx2	mmu-mir-15b	n/a	n/a	Repression	26055324	literature	n/a	M.musculus
Pknox1	mmu-mir-15b	chr3: 69004738(NM_001356976)	chr3: 69004513-69004615(score=384)	Regulation(feedback)	SRX170715	level 1	Embryo	M.musculus
Pou2f1	mmu-mir-15b	chr3: 69004738(NM_001356976)	chr3: 69004527-69005039(score=674)	Regulation	SRX877595	level 1	Blood	M.musculus
Pou5f1	mmu-mir-15b	chr3: 69004738(NM_001356976)	chr3: 69005037-69005296(score=527)	Regulation	ERX238063	level 1	Pluripotent stem cell	M.musculus
Pparg	mmu-mir-15b	chr3: 69004996	chr3: 69004786-69004941(score=949)	Regulation	SRX202796	level 2	Embryonic fibroblast	M.musculus
Prdm13	mmu-mir-15b	chr3: 69004996	chr3: 69004711-69004993(score=405)	Regulation	SRX2997656	level 2	Embryo	M.musculus
Ptf1a	mmu-mir-15b	chr3: 69004996	chr3: 69004830-69004992(score=271)	Regulation	SRX2069639	level 2	Pancreas	M.musculus
Rad21	mmu-mir-15b	chr3: 69004738(NM_001356976)	chr3: 69002881-69003060(score=851)	Regulation	SRX140398	level 1	Blood	M.musculus
Rag1	mmu-mir-15b	chr3: 69009772	chr3: 69006143-69006267(score=389)	Regulation	SRX1046534	level 1	Blood	M.musculus
Rag2	mmu-mir-15b	chr3: 69004738(NM_001356976)	chr3: 69005009-69005321(score=613)	Regulation	SRX1046550	level 1	Blood	M.musculus
Rbfox2	mmu-mir-15b	chr3: 69004738(NM_001356976)	chr3: 69004847-69005686(score=502)	Regulation(feedback)	SRX551545	level 1	Embryonic fibroblast	M.musculus
Rela	mmu-mir-15b	chr3: 69004996	chr3: 69004704-69004970(score=560)	Regulation	SRX2858289	level 2	Blood	M.musculus
Rfx1	mmu-mir-15b	chr3: 69004738(NM_001356976)	chr3: 69004456-69004567(score=591)	Regulation	SRX1161944	level 1	Pancreas	M.musculus
Runx1	mmu-mir-15b	chr3: 69009772	chr3: 69005960-69006210(score=548)	Regulation	SRX310206	level 1	Blood	M.musculus
Runx2	mmu-mir-15b	chr3: 69009772	chr3: 69005992-69006118(score=259)	Regulation	SRX425485	level 1	Bone	M.musculus
Sap130	mmu-mir-15b	chr3: 69009772	chr3: 69004958-69006265(score=1000)	Regulation	SRX1568882	level 1	Embryo	M.musculus
Sin3a	mmu-mir-15b	chr3: 69004996	chr3: 69004905-69005068(score=415)	Regulation(feedback)	SRX188801	level 2	Blood	M.musculus
Sirt1	mmu-mir-15b	chr3: 69004996	chr3: 69004815-69005006(score=1000)	Regulation	SRX019014	level 2	Neural	M.musculus
Smad1	mmu-mir-15b	chr3: 69004738(NM_001356976)	chr3: 69004504-69004609(score=417)	Regulation	SRX100317	level 1	Blood	M.musculus
Smarca4	mmu-mir-15b	chr3: 69009772	chr3: 69005706-69006296(score=326)	Regulation	SRX1815508	level 1	Blood	M.musculus
Snai1	mmu-mir-15b	chr3: 69004738(NM_001356976)	chr3: 69004985-69005097(score=479)	Regulation	SRX695880	level 1	Breast	M.musculus
Spi1	mmu-mir-15b	chr3: 69004738(NM_001356976)	chr3: 69004441-69004639(score=487)	Regulation	SRX150878	level 1	Blood	M.musculus
Stat2	mmu-mir-15b	chr3: 69004738(NM_001356976)	chr3: 69004904-69005142(score=387)	Regulation(feedback)	SRX2647476	level 1	Blood	M.musculus
Stat4	mmu-mir-15b	chr3: 69004738(NM_001356976)	chr3: 69004352-69004525(score=903)	Regulation	SRX021624	level 1	Blood	M.musculus
Stat5a	mmu-mir-15b	chr3: 69004738(NM_001356976)	chr3: 69004248-69004558(score=1000)	Regulation	SRX037910	level 1	Blood	M.musculus
Stat5b	mmu-mir-15b	chr3: 69004738(NM_001356976)	chr3: 69004306-69004499(score=452)	Regulation	SRX3067396	level 1	Blood	M.musculus
Supt5	mmu-mir-15b	chr3: 69004738(NM_001356976)	chr3: 69004988-69005101(score=314)	Regulation	SRX027109	level 1	Blood	M.musculus
Taf7l	mmu-mir-15b	chr3: 69004738(NM_001356976)	chr3: 69005061-69005309(score=376)	Regulation	SRX349390	level 1	Gonad	M.musculus
Tbp	mmu-mir-15b	chr3: 69004996	chr3: 69004882-69005034(score=424)	Regulation(feedback)	SRX140376	level 2	Blood	M.musculus
Tcf7	mmu-mir-15b	chr3: 69004738(NM_001356976)	chr3: 69004446-69004704(score=394)	Regulation	ERX1303357	level 1	Pluripotent stem cell	M.musculus
Tead4	mmu-mir-15b	chr3: 69004738(NM_001356976)	chr3: 69004382-69004776(score=320)	Regulation	SRX1885943	level 1	Liver	M.musculus
Tfap2c	mmu-mir-15b	chr3: 69004738(NM_001356976)	chr3: 69005027-69005307(score=436)	Regulation	SRX700365	level 1	Breast	M.musculus
Tgif1	mmu-mir-15b	chr3: 69004738(NM_001356976)	chr3: 69005167-69005310(score=354)	Regulation	SRX475271	level 1	Blood	M.musculus
Wdr5	mmu-mir-15b	chr3: 69004996	chr3: 69004758-69005055(score=571)	Regulation	SRX1815515	level 2	Blood	M.musculus
Xbp1	mmu-mir-15b	chr3: 69004738(NM_001356976)	chr3: 69004423-69004716(score=541)	Regulation	SRX2053272	level 1	Liver	M.musculus
Yy1	mmu-mir-15b	chr3: 69004738(NM_001356976)	chr3: 69004695-69005231(score=1000)	Regulation	SRX2873907	level 1	Pluripotent stem cell	M.musculus
Zfp143	mmu-mir-15b	chr3: 69004996	chr3: 69004813-69005044(score=1000)	Regulation	SRX159137	level 2	Embryonic fibroblast	M.musculus
Zfp281	mmu-mir-15b	chr3: 69004738(NM_001356976)	chr3: 69004862-69005613(score=1000)	Regulation(feedback)	SRX1540623	level 1	Pluripotent stem cell	M.musculus
Zfp384	mmu-mir-15b	chr3: 69004996	chr3: 69004702-69005050(score=1000)	Regulation	SRX188817	level 2	Blood	M.musculus
Zfp42	mmu-mir-15b	chr3: 69004996	chr3: 69004841-69005029(score=526)	Regulation	SRX128354	level 2	Pluripotent stem cell	M.musculus
Zfp57	mmu-mir-15b	chr3: 69009772	chr3: 69006014-69006221(score=361)	Regulation	SRX476210	level 1	Pluripotent stem cell	M.musculus
Zic1	mmu-mir-15b	chr3: 69004738(NM_001356976)	chr3: 69004785-69005285(score=432)	Regulation	SRX685921	level 1	Neural	M.musculus
Batf	mmu-mir-146a	chr11: 43374461	chr11: 43377187-43377437(score=1000)	Regulation	SRX187192	level 1	Blood	M.musculus
Batf3	mmu-mir-146a	chr11: 43374461	chr11: 43377219-43377407(score=361)	Regulation	SRX2646184	level 1	Blood	M.musculus
Cebpb	mmu-mir-146a	n/a	n/a	Repression	26538391	literature	n/a	M.musculus
Ep300	mmu-mir-146a	chr11: 43374461	chr11: 43377211-43377571(score=1000)	Regulation	SRX183949	level 1	Blood	M.musculus
Fosl2	mmu-mir-146a	chr11: 43374461	chr11: 43377227-43377530(score=541)	Regulation	SRX187215	level 1	Blood	M.musculus
Foxa2	mmu-mir-146a	chr11: 43374461	chr11: 43373494-43373712(score=946)	Regulation	SRX445035	level 1	Pancreas	M.musculus
Irf4	mmu-mir-146a	chr11: 43374461	chr11: 43377177-43377452(score=548)	Regulation(feedback)	SRX2766383	level 1	Blood	M.musculus
Junb	mmu-mir-146a	chr11: 43374461	chr11: 43377172-43377572(score=1000)	Regulation	SRX2773920	level 1	Blood	M.musculus
Nfkb1	mmu-mir-146a	n/a	n/a	Activation	21981419	literature	n/a	M.musculus
Nr3c1	mmu-mir-146a	chr11: 43374461	chr11: 43375063-43375208(score=470)	Regulation	SRX821802	level 1	Adipocyte	M.musculus
Pou2af1	mmu-mir-146a	n/a	n/a	Activation	24719463	literature	n/a	M.musculus
Rela	mmu-mir-146a	n/a	n/a	Activation	25757558	literature	n/a	M.musculus
Runx1	mmu-mir-146a	chr11: 43374461	chr11: 43376292-43376444(score=592)	Regulation	SRX2789670	level 1	Blood	M.musculus
Spi1	mmu-mir-146a	chr11: 43374461	chr11: 43378933-43379166(score=1000)	Regulation	SRX2188529	level 1	Blood	M.musculus
Trp53	mmu-mir-146a	n/a	n/a	Repression	25757558	literature	n/a	M.musculus
Batf	mmu-mir-342-3p	chr12: 108635803	chr12: 108635575-108635724(score=411)	Regulation	SRX187198	level 2	Blood	M.musculus
Batf3	mmu-mir-342-3p	chr12: 108658620	chr12: 108655911-108656128(score=778)	Regulation	SRX956766	level 1	Blood	M.musculus
Bcl11b	mmu-mir-342-3p	chr12: 108635803	chr12: 108635564-108635887(score=979)	Regulation	SRX2399085	level 2	Blood	M.musculus
Btaf1	mmu-mir-342-3p	chr12: 108554720(NM_001163394)	chr12: 108554531-108555518(score=1000)	Regulation	SRX2894851	level 1	Pluripotent stem cell	M.musculus
Cbfb	mmu-mir-342-3p	chr12: 108635803	chr12: 108635571-108635903(score=1000)	Regulation	SRX2389673	level 2	Blood	M.musculus
Cebpa	mmu-mir-342-3p	chr12: 108605766(NM_001163395)	chr12: 108600952-108601251(score=1000)	Regulation	SRX884092	level 1	Blood	M.musculus
Cebpb	mmu-mir-342-3p	chr12: 108605766(NM_001163395)	chr12: 108600985-108601155(score=463)	Regulation	SRX201997	level 1	Bone	M.musculus
Ctcf	mmu-mir-342-3p	chr12: 108658620	chr12: 108657524-108657611(score=429)	Regulation	SRX1357083	level 1	Adipocyte	M.musculus
Dr1	mmu-mir-342-3p	chr12: 108554720(NM_001163394)	chr12: 108554321-108555550(score=1000)	Regulation	SRX2894853	level 1	Pluripotent stem cell	M.musculus
Ebf2	mmu-mir-342-3p	chr12: 108554720(NM_001163394)	chr12: 108554521-108554608(score=379)	Regulation	SRX1357069	level 1	Adipocyte	M.musculus
Ep300	mmu-mir-342-3p	chr12: 108635803	chr12: 108635580-108635828(score=442)	Regulation	SRX1613082	level 2	Blood	M.musculus
Erg	mmu-mir-342-3p	chr12: 108605766(NM_001163395)	chr12: 108600984-108601146(score=596)	Regulation	SRX884089	level 1	Blood	M.musculus
Esr1	mmu-mir-342-3p	chr12: 108658620	chr12: 108658026-108658322(score=1000)	Regulation	SRX2918122	level 1	Uterus	M.musculus
Ezh2	mmu-mir-342-3p	chr12: 108554720(NM_001163394)	chr12: 108555030-108555386(score=407)	Regulation	SRX330668	level 1	Pluripotent stem cell	M.musculus
Fli1	mmu-mir-342-3p	chr12: 108605766(NM_001163395)	chr12: 108600977-108601116(score=544)	Regulation	SRX884087	level 1	Blood	M.musculus
Foxp3	mmu-mir-342-3p	chr12: 108635803	chr12: 108635559-108635777(score=484)	Regulation	SRX2341417	level 2	Blood	M.musculus
Gata2	mmu-mir-342-3p	chr12: 108658620	chr12: 108658106-108658242(score=483)	Regulation	SRX183894	level 1	Uterus	M.musculus
Gtf3c1	mmu-mir-342-3p	chr12: 108554720(NM_001163394)	chr12: 108554706-108555259(score=501)	Regulation	SRX1688327	level 1	Pluripotent stem cell	M.musculus
Hdac2	mmu-mir-342-3p	chr12: 108635803	chr12: 108635547-108635779(score=610)	Regulation	SRX1815513	level 2	Blood	M.musculus
Hif1a	mmu-mir-342-3p	chr12: 108605766(NM_001163395)	chr12: 108600999-108601168(score=794)	Regulation	SRX187225	level 1	Blood	M.musculus
Ikzf1	mmu-mir-342-3p	chr12: 108658620	chr12: 108657469-108657598(score=619)	Regulation	SRX205986	level 1	Blood	M.musculus
Ino80	mmu-mir-342-3p	chr12: 108554720(NM_001163394)	chr12: 108554605-108555508(score=1000)	Regulation	SRX2894852	level 1	Pluripotent stem cell	M.musculus
Insm1	mmu-mir-342-3p	chr12: 108554720(NM_001163394)	chr12: 108555091-108555264(score=238)	Regulation	SRX445033	level 1	Pancreas	M.musculus
Irf1	mmu-mir-342-3p	chr12: 108635803	chr12: 108635546-108635832(score=427)	Regulation	SRX805967	level 2	Blood	M.musculus
Irf4	mmu-mir-342-3p	chr12: 108554720(NM_001163394)	chr12: 108554539-108554788(score=415)	Regulation	SRX2162564	level 1	Blood	M.musculus
Jund	mmu-mir-342-3p	chr12: 108605766(NM_001163395)	chr12: 108601020-108601176(score=457)	Regulation	SRX172347	level 1	Blood	M.musculus
Kdm2b	mmu-mir-342-3p	chr12: 108554720(NM_001163394)	chr12: 108555101-108555421(score=425)	Regulation	SRX186548	level 1	Pluripotent stem cell	M.musculus
Kdm4c	mmu-mir-342-3p	chr12: 108554720(NM_001163394)	chr12: 108554740-108554881(score=325)	Regulation	SRX213793	level 1	Pluripotent stem cell	M.musculus
Kmt2a	mmu-mir-342-3p	chr12: 108635753(NM_001163396)	chr12: 108635552-108636022(score=900)	Regulation	SRX1815514	level 1	Blood	M.musculus
Kmt2b	mmu-mir-342-3p	chr12: 108554720(NM_001163394)	chr12: 108554687-108555394(score=660)	Regulation	SRX1602651	level 1	Pluripotent stem cell	M.musculus
Mafb	mmu-mir-342-3p	chr12: 108635803	chr12: 108635571-108635790(score=639)	Regulation(feedback)	SRX1465586	level 2	Blood	M.musculus
Med1	mmu-mir-342-3p	chr12: 108554720(NM_001163394)	chr12: 108554879-108555014(score=345)	Regulation(feedback)	SRX2609737	level 1	Pluripotent stem cell	M.musculus
Mta2	mmu-mir-342-3p	chr12: 108635803	chr12: 108635558-108635871(score=584)	Regulation	SRX1205896	level 2	Blood	M.musculus
Myod1	mmu-mir-342-3p	chr12: 108554720(NM_001163394)	chr12: 108554966-108555098(score=404)	Regulation	SRX114684	level 1	Embryonic fibroblast	M.musculus
Nanog	mmu-mir-342-3p	chr12: 108554720(NM_001163394)	chr12: 108553240-108553536(score=870)	Regulation	ERX238064	level 1	Pluripotent stem cell	M.musculus
Neurod2	mmu-mir-342-3p	chr12: 108554720(NM_001163394)	chr12: 108554997-108555218(score=354)	Regulation	SRX977541	level 1	Embryo	M.musculus
Nr3c1	mmu-mir-342-3p	chr12: 108554720(NM_001163394)	chr12: 108553148-108553382(score=352)	Regulation	SRX821805	level 1	Adipocyte	M.musculus
Olig2	mmu-mir-342-3p	chr12: 108554720(NM_001163394)	chr12: 108554937-108555053(score=670)	Regulation	ERX380399	level 1	Neural	M.musculus
Otx2	mmu-mir-342-3p	chr12: 108605766(NM_001163395)	chr12: 108604629-108604849(score=522)	Regulation	SRX499129	level 1	Pluripotent stem cell	M.musculus
Pou5f1	mmu-mir-342-3p	chr12: 108554720(NM_001163394)	chr12: 108554681-108555412(score=813)	Regulation	ERX238062	level 1	Pluripotent stem cell	M.musculus
Pparg	mmu-mir-342-3p	chr12: 108554720(NM_001163394)	chr12: 108555118-108555215(score=310)	Regulation	SRX202796	level 1	Embryonic fibroblast	M.musculus
Prdm1	mmu-mir-342-3p	chr12: 108635753(NM_001163396)	chr12: 108630779-108630962(score=524)	Regulation	SRX1131938	level 1	Blood	M.musculus
Rad21	mmu-mir-342-3p	chr12: 108658620	chr12: 108657379-108657711(score=1000)	Regulation	SRX1815538	level 1	Blood	M.musculus
Rag2	mmu-mir-342-3p	chr12: 108554720(NM_001163394)	chr12: 108554734-108555419(score=532)	Regulation	SRX1046545	level 1	Blood	M.musculus
Rela	mmu-mir-342-3p	chr12: 108635753(NM_001163396)	chr12: 108631148-108631332(score=565)	Regulation	SRX1650088	level 1	Blood	M.musculus
Rnf2	mmu-mir-342-3p	chr12: 108554720(NM_001163394)	chr12: 108555034-108555388(score=514)	Regulation	SRX186547	level 1	Pluripotent stem cell	M.musculus
Runx1	mmu-mir-342-3p	chr12: 108635803	chr12: 108635548-108635867(score=655)	Regulation	SRX2789670	level 2	Blood	M.musculus
Runx2	mmu-mir-342-3p	chr12: 108605766(NM_001163395)	chr12: 108600987-108601128(score=655)	Regulation	SRX425485	level 1	Bone	M.musculus
Runx3	mmu-mir-342-3p	chr12: 108605766(NM_001163395)	chr12: 108600998-108601155(score=525)	Regulation	SRX338030	level 1	Blood	M.musculus
Sap130	mmu-mir-342-3p	chr12: 108554720(NM_001163394)	chr12: 108554846-108555538(score=1000)	Regulation	SRX1568882	level 1	Embryo	M.musculus
Satb1	mmu-mir-342-3p	chr12: 108635803	chr12: 108635611-108635821(score=407)	Regulation	SRX2379961	level 2	Blood	M.musculus
Smarca4	mmu-mir-342-3p	chr12: 108635803	chr12: 108635544-108635763(score=540)	Regulation(feedback)	SRX1815508	level 2	Blood	M.musculus
Smc1a	mmu-mir-342-3p	chr12: 108658620	chr12: 108657468-108657680(score=1000)	Regulation	SRX700951	level 1	Blood	M.musculus
Smc3	mmu-mir-342-3p	chr12: 108658620	chr12: 108657351-108657758(score=940)	Regulation	SRX2580289	level 1	Blood	M.musculus
Snai1	mmu-mir-342-3p	chr12: 108554720(NM_001163394)	chr12: 108554677-108554794(score=582)	Regulation	SRX695880	level 1	Breast	M.musculus
Spi1	mmu-mir-342-3p	chr12: 108605766(NM_001163395)	chr12: 108600949-108601163(score=1000)	Regulation	SRX884085	level 1	Blood	M.musculus
Srf	mmu-mir-342-3p	n/a	n/a	Activation	19004760	literature	n/a	M.musculus
Stag1	mmu-mir-342-3p	chr12: 108658620	chr12: 108657490-108657614(score=432)	Regulation	ERX112990	level 1	Liver	M.musculus
Stat1	mmu-mir-342-3p	chr12: 108635803	chr12: 108635631-108635742(score=371)	Regulation	SRX109333	level 2	Blood	M.musculus
Stat3	mmu-mir-342-3p	chr12: 108635803	chr12: 108635614-108635719(score=378)	Regulation(feedback)	SRX037909	level 2	Blood	M.musculus
Stat5a	mmu-mir-342-3p	chr12: 108635803	chr12: 108635614-108635754(score=360)	Regulation	SRX037910	level 2	Blood	M.musculus
Stat6	mmu-mir-342-3p	n/a	n/a	Activation	27245778	literature	n/a	M.musculus
Suz12	mmu-mir-342-3p	chr12: 108554720(NM_001163394)	chr12: 108555165-108555532(score=571)	Regulation	SRX692983	level 1	Blood	M.musculus
Taf3	mmu-mir-342-3p	chr12: 108554720(NM_001163394)	chr12: 108554947-108555065(score=445)	Regulation	SRX091892	level 1	Pluripotent stem cell	M.musculus
Taf7l	mmu-mir-342-3p	chr12: 108554720(NM_001163394)	chr12: 108554982-108555170(score=374)	Regulation	SRX349390	level 1	Gonad	M.musculus
Tbp	mmu-mir-342-3p	chr12: 108554720(NM_001163394)	chr12: 108554660-108554799(score=723)	Regulation(feedback)	SRX202800	level 1	Embryonic fibroblast	M.musculus
Tbx21	mmu-mir-342-3p	chr12: 108605766(NM_001163395)	chr12: 108600986-108601112(score=438)	Regulation	SRX107338	level 1	Blood	M.musculus
Tcf12	mmu-mir-342-3p	chr12: 108605766(NM_001163395)	chr12: 108604640-108604832(score=557)	Regulation	SRX390399	level 1	Pluripotent stem cell	M.musculus
Tcf3	mmu-mir-342-3p	chr12: 108658620	chr12: 108653691-108653801(score=290)	Regulation	SRX310197	level 1	Pluripotent stem cell	M.musculus
Tead1	mmu-mir-342-3p	chr12: 108635753(NM_001163396)	chr12: 108631104-108631334(score=442)	Regulation	SRX2162568	level 1	Blood	M.musculus
Tfap2c	mmu-mir-342-3p	chr12: 108554720(NM_001163394)	chr12: 108554536-108554771(score=774)	Regulation	SRX700365	level 1	Breast	M.musculus
Tgif1	mmu-mir-342-3p	chr12: 108635753(NM_001163396)	chr12: 108631339-108631537(score=792)	Regulation(feedback)	SRX475271	level 1	Blood	M.musculus
Wdr5	mmu-mir-342-3p	chr12: 108635803	chr12: 108635558-108635786(score=587)	Regulation	SRX1815515	level 2	Blood	M.musculus
Zbtb17	mmu-mir-342-3p	chr12: 108635753(NM_001163396)	chr12: 108635345-108635730(score=1000)	Regulation	SRX3113700	level 1	Blood	M.musculus
Zfp42	mmu-mir-342-3p	chr12: 108658620	chr12: 108657457-108657579(score=669)	Regulation	SRX128354	level 1	Pluripotent stem cell	M.musculus
Zic1	mmu-mir-342-3p	chr12: 108554720(NM_001163394)	chr12: 108554729-108555422(score=549)	Regulation	SRX685920	level 1	Neural	M.musculus
Atf2	mmu-mir-214	chr1: 162217623(NR_002870)	chr1: 162217512-162217628(score=281)	Regulation	SRX515669	level 1	Embryonic fibroblast	M.musculus
Atf3	mmu-mir-214	chr1: 162217623(NR_002870)	chr1: 162215771-162216108(score=1000)	Regulation	SRX2901303	level 1	Blood	M.musculus
Batf	mmu-mir-214	chr1: 162217623(NR_002870)	chr1: 162215850-162216041(score=873)	Regulation	SRX187191	level 1	Blood	M.musculus
Brd4	mmu-mir-214	chr1: 162217623(NR_002870)	chr1: 162215871-162216009(score=331)	Regulation	SRX2836972	level 1	Adipocyte	M.musculus
Btaf1	mmu-mir-214	chr1: 162217623(NR_002870)	chr1: 162216895-162217190(score=532)	Regulation	SRX2609731	level 1	Pluripotent stem cell	M.musculus
Cebpa	mmu-mir-214	chr1: 162217623(NR_002870)	chr1: 162215841-162215991(score=818)	Regulation	SRX1521006	level 1	Adipocyte	M.musculus
Cebpb	mmu-mir-214	chr1: 162217623(NR_002870)	chr1: 162215848-162215966(score=555)	Regulation	SRX341415	level 1	Adipocyte	M.musculus
Creb1	mmu-mir-214	chr1: 162217623(NR_002870)	chr1: 162215855-162216019(score=587)	Regulation	SRX1521009	level 1	Adipocyte	M.musculus
Crebbp	mmu-mir-214	chr1: 162217623(NR_002870)	chr1: 162217438-162217554(score=323)	Regulation	SRX1357055	level 1	Adipocyte	M.musculus
Crtc2	mmu-mir-214	chr1: 162217623(NR_002870)	chr1: 162215833-162216035(score=592)	Regulation	SRX1822328	level 1	Embryonic fibroblast	M.musculus
Ebf2	mmu-mir-214	chr1: 162217623(NR_002870)	chr1: 162217471-162217685(score=1000)	Regulation	SRX1357069	level 1	Adipocyte	M.musculus
Elf5	mmu-mir-214	chr1: 162217623(NR_002870)	chr1: 162213786-162213941(score=448)	Regulation	SRX1672063	level 1	Breast	M.musculus
Ep300	mmu-mir-214	chr1: 162217623(NR_002870)	chr1: 162216902-162217022(score=271)	Regulation(feedback)	SRX1357130	level 1	Adipocyte	M.musculus
Esr1	mmu-mir-214	chr1: 162217623(NR_002870)	chr1: 162217442-162217672(score=1000)	Regulation	SRX508007	level 1	Uterus	M.musculus
Fos	mmu-mir-214	chr1: 162217623(NR_002870)	chr1: 162215822-162216073(score=501)	Regulation	SRX2901289	level 1	Blood	M.musculus
Fosl1	mmu-mir-214	chr1: 162217623(NR_002870)	chr1: 162212679-162212875(score=623)	Regulation	SRX2396482	level 1	Embryonic fibroblast	M.musculus
Fosl2	mmu-mir-214	chr1: 162217623(NR_002870)	chr1: 162215836-162216059(score=1000)	Regulation	SRX187215	level 1	Blood	M.musculus
Gtf2b	mmu-mir-214	chr1: 162217623(NR_002870)	chr1: 162217576-162217741(score=324)	Regulation	SRX517512	level 1	Cardiovascular	M.musculus
Hdac2	mmu-mir-214	chr1: 162217623(NR_002870)	chr1: 162217458-162217867(score=649)	Regulation	SRX2599795	level 1	Embryonic fibroblast	M.musculus
Hoxa13	mmu-mir-214	chr1: 162217623(NR_002870)	chr1: 162217387-162217657(score=431)	Regulation	SRX1757411	level 1	Embryo	M.musculus
Hoxd13	mmu-mir-214	chr1: 162217623(NR_002870)	chr1: 162217347-162217694(score=573)	Regulation	SRX1757412	level 1	Embryo	M.musculus
Hsf1	mmu-mir-214	chr1: 162223368	chr1: 162218987-162219178(score=532)	Regulation	SRX1132779	level 1	Embryonic fibroblast	M.musculus
Jun	mmu-mir-214	chr1: 162217623(NR_002870)	chr1: 162215879-162216012(score=435)	Regulation	SRX1281904	level 1	Bone	M.musculus
Junb	mmu-mir-214	chr1: 162217623(NR_002870)	chr1: 162215744-162216163(score=1000)	Regulation	SRX2901294	level 1	Blood	M.musculus
Jund	mmu-mir-214	chr1: 162217623(NR_002870)	chr1: 162215786-162216095(score=851)	Regulation	SRX2901297	level 1	Blood	M.musculus
Kmt2d	mmu-mir-214	chr1: 162217623(NR_002870)	chr1: 162215896-162216020(score=426)	Regulation(feedback)	SRX1357123	level 1	Adipocyte	M.musculus
Mafk	mmu-mir-214	chr1: 162223368	chr1: 162222408-162222636(score=836)	Regulation	SRX140361	level 1	Blood	M.musculus
Med1	mmu-mir-214	chr1: 162217623(NR_002870)	chr1: 162215006-162215205(score=330)	Regulation	SRX520210	level 1	Embryonic fibroblast	M.musculus
Med12	mmu-mir-214	chr1: 162217623(NR_002870)	chr1: 162217611-162217761(score=337)	Regulation	SRX022701	level 1	Embryonic fibroblast	M.musculus
Myc	mmu-mir-214	chr1: 162223368	chr1: 162220201-162220312(score=431)	Regulation	SRX871676	level 1	Digestive tract	M.musculus
Myod1	mmu-mir-214	chr1: 162217623(NR_002870)	chr1: 162215898-162216021(score=492)	Regulation	SRX114684	level 1	Embryonic fibroblast	M.musculus
Nanog	mmu-mir-214	chr1: 162217623(NR_002870)	chr1: 162213658-162213956(score=561)	Regulation	SRX1704897	level 1	Pluripotent stem cell	M.musculus
Nelfb	mmu-mir-214	chr1: 162217623(NR_002870)	chr1: 162217592-162217831(score=447)	Regulation	SRX026745	level 1	Embryonic fibroblast	M.musculus
Neurod2	mmu-mir-214	chr1: 162217623(NR_002870)	chr1: 162217427-162217580(score=489)	Regulation	SRX114685	level 1	Embryonic fibroblast	M.musculus
Nfkb1	mmu-mir-214	n/a	n/a	Activation	26171727	literature	n/a	M.musculus
Nipbl	mmu-mir-214	chr1: 162217623(NR_002870)	chr1: 162217558-162217748(score=379)	Regulation	SRX1500058	level 1	Embryonic fibroblast	M.musculus
Nr3c1	mmu-mir-214	chr1: 162217623(NR_002870)	chr1: 162217446-162217716(score=969)	Regulation	SRX821802	level 1	Adipocyte	M.musculus
Otx2	mmu-mir-214	chr1: 162217623(NR_002870)	chr1: 162216083-162216235(score=481)	Regulation	SRX429085	level 1	Neural	M.musculus
Pou5f1	mmu-mir-214	chr1: 162217623(NR_002870)	chr1: 162212697-162212846(score=532)	Regulation	SRX977378	level 1	Pluripotent stem cell	M.musculus
Prdm16	mmu-mir-214	chr1: 162217623(NR_002870)	chr1: 162215807-162216082(score=1000)	Regulation	SRX2044195	level 1	Adipocyte	M.musculus
Rbfox2	mmu-mir-214	chr1: 162217623(NR_002870)	chr1: 162217529-162218158(score=672)	Regulation	SRX551546	level 1	Embryonic fibroblast	M.musculus
Rela	mmu-mir-214	chr1: 162217623(NR_002870)	chr1: 162215789-162216144(score=939)	Regulation	SRX2901318	level 1	Blood	M.musculus
Runx2	mmu-mir-214	chr1: 162217623(NR_002870)	chr1: 162217450-162217704(score=612)	Regulation	SRX1487129	level 1	Blood	M.musculus
Rxra	mmu-mir-214	chr1: 162217623(NR_002870)	chr1: 162217291-162217784(score=682)	Regulation	SRX423962	level 1	Bone	M.musculus
Smarca4	mmu-mir-214	chr1: 162217623(NR_002870)	chr1: 162217934-162218063(score=261)	Regulation	SRX352043	level 1	Epidermis	M.musculus
Spi1	mmu-mir-214	chr1: 162217623(NR_002870)	chr1: 162217244-162217774(score=669)	Regulation	SRX498823	level 1	Blood	M.musculus
Srf	mmu-mir-214	chr1: 162217623(NR_002870)	chr1: 162217256-162217744(score=1000)	Regulation	SRX1462203	level 1	Embryonic fibroblast	M.musculus
Stat1	mmu-mir-214	chr1: 162217623(NR_002870)	chr1: 162215767-162216119(score=1000)	Regulation	SRX498832	level 1	Blood	M.musculus
Stat3	mmu-mir-214	chr1: 162217623(NR_002870)	chr1: 162215832-162216041(score=1000)	Regulation	SRX865024	level 1	Blood	M.musculus
Stat4	mmu-mir-214	chr1: 162217623(NR_002870)	chr1: 162215827-162216039(score=1000)	Regulation	SRX021624	level 1	Blood	M.musculus
Stat5a	mmu-mir-214	chr1: 162217623(NR_002870)	chr1: 162215848-162216050(score=1000)	Regulation	SRX037910	level 1	Blood	M.musculus
Stat5b	mmu-mir-214	chr1: 162217623(NR_002870)	chr1: 162215857-162216036(score=555)	Regulation	SRX041333	level 1	Blood	M.musculus
Tbp	mmu-mir-214	chr1: 162217623(NR_002870)	chr1: 162217583-162217768(score=885)	Regulation	SRX202801	level 1	Embryonic fibroblast	M.musculus
Tbx21	mmu-mir-214	chr1: 162217623(NR_002870)	chr1: 162215855-162216009(score=780)	Regulation	SRX107338	level 1	Blood	M.musculus
Tead4	mmu-mir-214	chr1: 162217623(NR_002870)	chr1: 162217431-162217669(score=492)	Regulation	SRX1885856	level 1	Embryonic fibroblast	M.musculus
Twist1	mmu-mir-214	n/a	n/a	Activation	26229009	literature	n/a	M.musculus
Vdr	mmu-mir-214	chr1: 162217623(NR_002870)	chr1: 162213823-162214215(score=1000)	Regulation	SRX423950	level 1	Bone	M.musculus
Zeb1	mmu-mir-214	chr1: 162217623(NR_002870)	chr1: 162217543-162217990(score=678)	Regulation	ERX459475	level 1	Embryonic fibroblast	M.musculus
Zfp384	mmu-mir-214	chr1: 162217623(NR_002870)	chr1: 162217219-162217488(score=688)	Regulation	SRX188816	level 1	Blood	M.musculus
Nfatc1	mmu-mir-374	n/a	n/a	Activation	24335970	literature	n/a	M.musculus
Ar	mmu-mir-25	chr5: 138171266(NM_001356576)	chr5: 138170955-138171110(score=733)	Regulation	SRX385392	level 1	Prostate	M.musculus
Arntl	mmu-mir-25	chr5: 138171266(NM_001356576)	chr5: 138170975-138171275(score=547)	Regulation	SRX415001	level 1	Liver	M.musculus
Bcl11b	mmu-mir-25	chr5: 138171266(NM_001356576)	chr5: 138170863-138171554(score=1000)	Regulation(feedback)	SRX2399084	level 1	Blood	M.musculus
Brd2	mmu-mir-25	chr5: 138171266(NM_001356576)	chr5: 138171406-138171824(score=619)	Regulation	SRX997156	level 1	Pluripotent stem cell	M.musculus
Brd4	mmu-mir-25	chr5: 138171266(NM_001356576)	chr5: 138171019-138171504(score=565)	Regulation	SRX1114541	level 1	Blood	M.musculus
Btaf1	mmu-mir-25	chr5: 138171266(NM_001356576)	chr5: 138171031-138171436(score=730)	Regulation	SRX2894851	level 1	Pluripotent stem cell	M.musculus
Cbfb	mmu-mir-25	chr5: 138171852	chr5: 138171801-138172067(score=291)	Regulation	SRX2389674	level 2	Blood	M.musculus
Cebpa	mmu-mir-25	chr5: 138171852	chr5: 138171948-138172110(score=721)	Regulation(feedback)	SRX884090	level 2	Blood	M.musculus
Cebpb	mmu-mir-25	chr5: 138171266(NM_001356576)	chr5: 138171009-138171274(score=1000)	Regulation(feedback)	SRX265315	level 1	Liver	M.musculus
Cebpe	mmu-mir-25	chr5: 138171266(NM_001356576)	chr5: 138171867-138172172(score=847)	Regulation	SRX1318193	level 1	Blood	M.musculus
Chd2	mmu-mir-25	chr5: 138171266(NM_001356576)	chr5: 138171926-138172185(score=825)	Regulation	SRX140392	level 1	Blood	M.musculus
Chd4	mmu-mir-25	chr5: 138171266(NM_001356576)	chr5: 138171007-138171258(score=429)	Regulation	SRX1815523	level 1	Blood	M.musculus
Clock	mmu-mir-25	chr5: 138171266(NM_001356576)	chr5: 138171023-138171301(score=662)	Regulation	SRX414999	level 1	Liver	M.musculus
Creb1	mmu-mir-25	chr5: 138171852	chr5: 138172055-138172152(score=232)	Regulation	SRX1521009	level 2	Adipocyte	M.musculus
Crebbp	mmu-mir-25	chr5: 138171266(NM_001356576)	chr5: 138171039-138171263(score=339)	Regulation	ERX113013	level 1	Liver	M.musculus
Ctcf	mmu-mir-25	chr5: 138171266(NM_001356576)	chr5: 138170994-138171277(score=460)	Regulation	SRX1815535	level 1	Blood	M.musculus
Dgcr8	mmu-mir-25	chr5: 138165818	chr5: 138165127-138165498(score=360)	Regulation	SRX2415034	level 1	Pluripotent stem cell	M.musculus
Dmc1	mmu-mir-25	chr5: 138171266(NM_001356576)	chr5: 138170789-138172722(score=707)	Regulation	SRX1452699	level 1	Gonad	M.musculus
Dr1	mmu-mir-25	chr5: 138171266(NM_001356576)	chr5: 138170930-138172105(score=1000)	Regulation	SRX2894853	level 1	Pluripotent stem cell	M.musculus
E2f1	mmu-mir-25	chr5: 138171852	chr5: 138171817-138172114(score=622)	Regulation	SRX1334844	level 2	Liver	M.musculus
E2f3	mmu-mir-25	chr5: 138171852	chr5: 138171817-138171895(score=344)	Regulation(feedback)	SRX871675	level 2	Digestive tract	M.musculus
E2f4	mmu-mir-25	chr5: 138171852	chr5: 138171813-138172118(score=565)	Regulation	SRX140375	level 2	Blood	M.musculus
Ebf2	mmu-mir-25	chr5: 138171266(NM_001356576)	chr5: 138171334-138171452(score=661)	Regulation	SRX1357069	level 1	Adipocyte	M.musculus
Egr2	mmu-mir-25	chr5: 138171266(NM_001356576)	chr5: 138171864-138172207(score=837)	Regulation(feedback)	SRX270570	level 1	Blood	M.musculus
Elf1	mmu-mir-25	chr5: 138171266(NM_001356576)	chr5: 138171046-138171414(score=1000)	Regulation(feedback)	SRX2242846	level 1	Blood	M.musculus
Elf4	mmu-mir-25	chr5: 138171266(NM_001356576)	chr5: 138170871-138171491(score=1000)	Regulation	SRX2242849	level 1	Blood	M.musculus
Ep300	mmu-mir-25	chr5: 138171852	chr5: 138171897-138172076(score=357)	Regulation	SRX183960	level 2	Blood	M.musculus
Erf	mmu-mir-25	chr5: 138171266(NM_001356576)	chr5: 138171017-138171268(score=379)	Regulation	SRX209937	level 1	Embryonic fibroblast	M.musculus
Erg	mmu-mir-25	chr5: 138171266(NM_001356576)	chr5: 138170906-138171313(score=424)	Regulation	SRX1939438	level 1	Blood	M.musculus
Esr1	mmu-mir-25	chr5: 138171266(NM_001356576)	chr5: 138171002-138171456(score=636)	Regulation	SRX2548308	level 1	Uterus	M.musculus
Ets1	mmu-mir-25	chr5: 138171266(NM_001356576)	chr5: 138170885-138171381(score=854)	Regulation	SRX2162542	level 1	Blood	M.musculus
Fli1	mmu-mir-25	chr5: 138171266(NM_001356576)	chr5: 138170902-138171353(score=822)	Regulation	SRX1939439	level 1	Blood	M.musculus
Fosl1	mmu-mir-25	chr5: 138165818	chr5: 138165210-138165346(score=509)	Regulation	SRX2396480	level 1	Embryonic fibroblast	M.musculus
Foxa1	mmu-mir-25	chr5: 138171266(NM_001356576)	chr5: 138170918-138171335(score=1000)	Regulation	ERX112984	level 1	Liver	M.musculus
Foxa2	mmu-mir-25	chr5: 138171266(NM_001356576)	chr5: 138170867-138171393(score=1000)	Regulation	SRX287023	level 1	Embryo	M.musculus
Foxf1	mmu-mir-25	chr5: 138171266(NM_001356576)	chr5: 138170962-138171058(score=365)	Regulation	SRX1585634	level 1	Lung	M.musculus
Foxk1	mmu-mir-25	chr5: 138171266(NM_001356576)	chr5: 138171013-138171097(score=324)	Regulation	SRX522662	level 1	Muscle	M.musculus
Foxp3	mmu-mir-25	chr5: 138171266(NM_001356576)	chr5: 138170941-138171343(score=678)	Regulation	SRX2341414	level 1	Blood	M.musculus
Gabpa	mmu-mir-25	chr5: 138171266(NM_001356576)	chr5: 138170933-138171442(score=1000)	Regulation	SRX2242853	level 1	Blood	M.musculus
Gata1	mmu-mir-25	chr5: 138171852	chr5: 138171834-138171995(score=593)	Regulation	SRX145055	level 2	Blood	M.musculus
Gata2	mmu-mir-25	chr5: 138171266(NM_001356576)	chr5: 138171075-138171319(score=629)	Regulation	SRX206424	level 1	Blood	M.musculus
Gata4	mmu-mir-25	chr5: 138171266(NM_001356576)	chr5: 138171070-138171304(score=594)	Regulation	SRX373595	level 1	Cardiovascular	M.musculus
Gfi1	mmu-mir-25	chr5: 138171266(NM_001356576)	chr5: 138171022-138171250(score=608)	Regulation	SRX093162	level 1	Blood	M.musculus
Gtf3c1	mmu-mir-25	chr5: 138171266(NM_001356576)	chr5: 138171005-138171353(score=601)	Regulation	SRX1688323	level 1	Pluripotent stem cell	M.musculus
Hcfc1	mmu-mir-25	chr5: 138171266(NM_001356576)	chr5: 138170961-138171389(score=1000)	Regulation	SRX188815	level 1	Blood	M.musculus
Hdac1	mmu-mir-25	chr5: 138171266(NM_001356576)	chr5: 138170873-138171451(score=1000)	Regulation	SRX1815525	level 1	Blood	M.musculus
Hdac2	mmu-mir-25	chr5: 138171266(NM_001356576)	chr5: 138170865-138171323(score=766)	Regulation	SRX1815527	level 1	Blood	M.musculus
Hdac3	mmu-mir-25	chr5: 138171266(NM_001356576)	chr5: 138170947-138171270(score=517)	Regulation	SRX1890322	level 1	Adipocyte	M.musculus
Hnf4a	mmu-mir-25	chr5: 138171266(NM_001356576)	chr5: 138171265-138171430(score=501)	Regulation	SRX2369875	level 1	Digestive tract	M.musculus
Hnf4g	mmu-mir-25	chr5: 138171266(NM_001356576)	chr5: 138171134-138171367(score=281)	Regulation	SRX2369884	level 1	Digestive tract	M.musculus
Ikzf1	mmu-mir-25	chr5: 138171852	chr5: 138172016-138172143(score=324)	Regulation(feedback)	SRX205986	level 2	Blood	M.musculus
Insm1	mmu-mir-25	chr5: 138171852	chr5: 138171758-138171888(score=267)	Regulation	SRX445033	level 2	Pancreas	M.musculus
Irf4	mmu-mir-25	chr5: 138171266(NM_001356576)	chr5: 138172152-138172474(score=380)	Regulation(feedback)	SRX2162564	level 1	Blood	M.musculus
Jun	mmu-mir-25	chr5: 138171266(NM_001356576)	chr5: 138170975-138171135(score=360)	Regulation(feedback)	SRX1281904	level 1	Bone	M.musculus
Jund	mmu-mir-25	chr5: 138171266(NM_001356576)	chr5: 138170915-138171251(score=605)	Regulation	SRX172347	level 1	Blood	M.musculus
Kansl3	mmu-mir-25	chr5: 138171266(NM_001356576)	chr5: 138170984-138171227(score=325)	Regulation	SRX368313	level 1	Pluripotent stem cell	M.musculus
Kat2a	mmu-mir-25	chr5: 138171852	chr5: 138171838-138171961(score=305)	Regulation	SRX188824	level 2	Blood	M.musculus
Kat5	mmu-mir-25	chr5: 138171266(NM_001356576)	chr5: 138171005-138171210(score=450)	Regulation	SRX1053802	level 1	Pluripotent stem cell	M.musculus
Kdm4c	mmu-mir-25	chr5: 138171266(NM_001356576)	chr5: 138171023-138171259(score=539)	Regulation(feedback)	SRX1755829	level 1	Blood	M.musculus
Kdm5a	mmu-mir-25	chr5: 138171266(NM_001356576)	chr5: 138170799-138171520(score=655)	Regulation	SRX2348508	level 1	Embryonic fibroblast	M.musculus
Kmt2a	mmu-mir-25	chr5: 138171266(NM_001356576)	chr5: 138170851-138171274(score=421)	Regulation	SRX1815528	level 1	Blood	M.musculus
Lmo2	mmu-mir-25	chr5: 138171266(NM_001356576)	chr5: 138171039-138171304(score=495)	Regulation	SRX1939444	level 1	Blood	M.musculus
Mafk	mmu-mir-25	chr5: 138165818	chr5: 138165696-138165895(score=1000)	Regulation	SRX188829	level 1	Pluripotent stem cell	M.musculus
Max	mmu-mir-25	chr5: 138171852	chr5: 138171809-138171956(score=474)	Regulation	SRX140382	level 2	Blood	M.musculus
Mbd3	mmu-mir-25	chr5: 138171266(NM_001356576)	chr5: 138171420-138171815(score=646)	Regulation	ERX080476	level 1	Pluripotent stem cell	M.musculus
Med1	mmu-mir-25	chr5: 138171852	chr5: 138171770-138171945(score=509)	Regulation	SRX2609737	level 2	Pluripotent stem cell	M.musculus
Meis1	mmu-mir-25	chr5: 138171852	chr5: 138171862-138172056(score=690)	Regulation	SRX475273	level 2	Blood	M.musculus
Men1	mmu-mir-25	chr5: 138171266(NM_001356576)	chr5: 138171004-138171408(score=1000)	Regulation	SRX415267	level 1	Blood	M.musculus
Mta2	mmu-mir-25	chr5: 138171266(NM_001356576)	chr5: 138171044-138171268(score=631)	Regulation	SRX1205896	level 1	Blood	M.musculus
Mxi1	mmu-mir-25	chr5: 138171852	chr5: 138171822-138172141(score=372)	Regulation	SRX140391	level 2	Blood	M.musculus
Myc	mmu-mir-25	chr5: 138171266(NM_001356576)	chr5: 138170914-138171237(score=644)	Regulation	SRX353782	level 1	Blood	M.musculus
Myf5	mmu-mir-25	chr5: 138171266(NM_001356576)	chr5: 138173414-138173697(score=654)	Regulation	SRX1451508	level 1	Embryonic fibroblast	M.musculus
Myod1	mmu-mir-25	chr5: 138171266(NM_001356576)	chr5: 138173441-138173623(score=815)	Regulation	SRX114684	level 1	Embryonic fibroblast	M.musculus
Ncaph2	mmu-mir-25	chr5: 138171266(NM_001356576)	chr5: 138171509-138171809(score=458)	Regulation	SRX1688321	level 1	Pluripotent stem cell	M.musculus
Nelfe	mmu-mir-25	chr5: 138171266(NM_001356576)	chr5: 138171720-138171894(score=622)	Regulation	SRX140395	level 1	Blood	M.musculus
Neurod1	mmu-mir-25	chr5: 138171266(NM_001356576)	chr5: 138171011-138171335(score=546)	Regulation	SRX445034	level 1	Pancreas	M.musculus
Nfib	mmu-mir-25	chr5: 138171852	chr5: 138171851-138172071(score=943)	Regulation	SRX1672060	level 2	Breast	M.musculus
Nfyb	mmu-mir-25	chr5: 138171266(NM_001356576)	chr5: 138171108-138171458(score=1000)	Regulation	ERX594340	level 1	Embryonic fibroblast	M.musculus
Nkx6-1	mmu-mir-25	chr5: 138171852	chr5: 138171924-138172090(score=321)	Regulation	SRX188610	level 2	Pancreas	M.musculus
Npas3	mmu-mir-25	chr5: 138171266(NM_001356576)	chr5: 138171082-138171590(score=510)	Regulation	SRX1094550	level 1	Neural	M.musculus
Nr1d1	mmu-mir-25	chr5: 138171266(NM_001356576)	chr5: 138171009-138171168(score=318)	Regulation	SRX997764	level 1	Liver	M.musculus
Nr3c1	mmu-mir-25	chr5: 138171852	chr5: 138171916-138172123(score=336)	Regulation(feedback)	SRX821803	level 2	Adipocyte	M.musculus
Nr5a2	mmu-mir-25	chr5: 138171266(NM_001356576)	chr5: 138173429-138173587(score=747)	Regulation	SRX111395	level 1	Pancreas	M.musculus
Nsd3	mmu-mir-25	chr5: 138171266(NM_001356576)	chr5: 138171228-138171453(score=508)	Regulation(feedback)	SRX1114542	level 1	Blood	M.musculus
Onecut2	mmu-mir-25	chr5: 138171852	chr5: 138171872-138172026(score=390)	Regulation	SRX1706977	level 2	Pluripotent stem cell	M.musculus
Pbx1	mmu-mir-25	chr5: 138171852	chr5: 138171844-138172089(score=1000)	Regulation	SRX319742	level 2	Blood	M.musculus
Pgr	mmu-mir-25	chr5: 138171852	chr5: 138172005-138172150(score=332)	Regulation	SRX209678	level 2	Breast	M.musculus
Pitx2	mmu-mir-25	n/a	n/a	Activation	24927531	literature	n/a	M.musculus
Pknox1	mmu-mir-25	chr5: 138171852	chr5: 138171891-138172060(score=565)	Regulation	SRX170715	level 2	Embryo	M.musculus
Pou2f1	mmu-mir-25	chr5: 138171266(NM_001356576)	chr5: 138171146-138171368(score=437)	Regulation	SRX877595	level 1	Blood	M.musculus
Pou5f1	mmu-mir-25	chr5: 138171266(NM_001356576)	chr5: 138171021-138171256(score=375)	Regulation	SRX977377	level 1	Pluripotent stem cell	M.musculus
Pparg	mmu-mir-25	chr5: 138171266(NM_001356576)	chr5: 138172005-138172204(score=354)	Regulation	SRX2676941	level 1	Adipocyte	M.musculus
Prdm13	mmu-mir-25	chr5: 138171266(NM_001356576)	chr5: 138170993-138171293(score=670)	Regulation	SRX2997656	level 1	Embryo	M.musculus
Ptf1a	mmu-mir-25	chr5: 138171266(NM_001356576)	chr5: 138170926-138171327(score=766)	Regulation	SRX2069639	level 1	Pancreas	M.musculus
Rag2	mmu-mir-25	chr5: 138171266(NM_001356576)	chr5: 138170666-138171611(score=538)	Regulation	SRX1046553	level 1	Blood	M.musculus
Rbfox2	mmu-mir-25	chr5: 138171266(NM_001356576)	chr5: 138170973-138171501(score=553)	Regulation	SRX551545	level 1	Embryonic fibroblast	M.musculus
Rfx1	mmu-mir-25	chr5: 138171266(NM_001356576)	chr5: 138172353-138172504(score=1000)	Regulation	SRX1161944	level 1	Pancreas	M.musculus
Rfx2	mmu-mir-25	chr5: 138171266(NM_001356576)	chr5: 138172196-138172666(score=1000)	Regulation	SRX1011026	level 1	Gonad	M.musculus
Rfx3	mmu-mir-25	chr5: 138171266(NM_001356576)	chr5: 138172370-138172495(score=1000)	Regulation	SRX1161945	level 1	Pancreas	M.musculus
Runx1	mmu-mir-25	chr5: 138171852	chr5: 138171865-138172149(score=505)	Regulation(feedback)	SRX310206	level 2	Blood	M.musculus
Runx2	mmu-mir-25	chr5: 138171266(NM_001356576)	chr5: 138171049-138171346(score=602)	Regulation	SRX1487129	level 1	Blood	M.musculus
Rxra	mmu-mir-25	chr5: 138171266(NM_001356576)	chr5: 138172000-138172232(score=722)	Regulation	SRX769793	level 1	Blood	M.musculus
Sap130	mmu-mir-25	chr5: 138171266(NM_001356576)	chr5: 138170748-138171290(score=1000)	Regulation	SRX1568882	level 1	Embryo	M.musculus
Sin3a	mmu-mir-25	chr5: 138171266(NM_001356576)	chr5: 138170865-138171365(score=965)	Regulation	SRX188801	level 1	Blood	M.musculus
Sirt1	mmu-mir-25	chr5: 138171266(NM_001356576)	chr5: 138171285-138171456(score=1000)	Regulation	SRX019014	level 1	Neural	M.musculus
Six4	mmu-mir-25	chr5: 138171266(NM_001356576)	chr5: 138171022-138171264(score=456)	Regulation	SRX956814	level 1	Muscle	M.musculus
Smad1	mmu-mir-25	n/a	n/a	Activation	24349434	literature	n/a	M.musculus
Smad2	mmu-mir-25	chr5: 138171266(NM_001356576)	chr5: 138171065-138171262(score=271)	Regulation(feedback)	SRX390396	level 1	Pluripotent stem cell	M.musculus
Smad4	mmu-mir-25	chr5: 138171266(NM_001356576)	chr5: 138170978-138171102(score=341)	Regulation(feedback)	SRX529265	level 1	Lung	M.musculus
Smad5	mmu-mir-25	n/a	n/a	Activation	24349434	literature	n/a	M.musculus
Smarca4	mmu-mir-25	chr5: 138171266(NM_001356576)	chr5: 138170891-138171281(score=644)	Regulation	SRX1815522	level 1	Blood	M.musculus
Sox4	mmu-mir-25	chr5: 138171266(NM_001356576)	chr5: 138170994-138171039(score=291)	Regulation	SRX337568	level 1	Blood	M.musculus
Sox9	mmu-mir-25	chr5: 138171266(NM_001356576)	chr5: 138171035-138171268(score=485)	Regulation	SRX1035119	level 1	Embryo	M.musculus
Sp1	mmu-mir-25	chr5: 138171266(NM_001356576)	chr5: 138171047-138171360(score=417)	Regulation(feedback)	SRX378972	level 1	Pluripotent stem cell	M.musculus
Spi1	mmu-mir-25	chr5: 138171266(NM_001356576)	chr5: 138170941-138171404(score=1000)	Regulation	SRX1056343	level 1	Blood	M.musculus
Stat6	mmu-mir-25	chr5: 138171852	chr5: 138171832-138171936(score=534)	Regulation	SRX021632	level 2	Blood	M.musculus
Supt5	mmu-mir-25	chr5: 138171266(NM_001356576)	chr5: 138171751-138171866(score=360)	Regulation(feedback)	SRX213813	level 1	Pluripotent stem cell	M.musculus
Taf3	mmu-mir-25	chr5: 138171266(NM_001356576)	chr5: 138171066-138171278(score=365)	Regulation	SRX547090	level 1	Liver	M.musculus
Taf7l	mmu-mir-25	chr5: 138171266(NM_001356576)	chr5: 138172045-138172218(score=552)	Regulation	SRX202798	level 1	Embryonic fibroblast	M.musculus
Tbp	mmu-mir-25	chr5: 138171266(NM_001356576)	chr5: 138172024-138172153(score=363)	Regulation	SRX140376	level 1	Blood	M.musculus
Tcf12	mmu-mir-25	chr5: 138171266(NM_001356576)	chr5: 138171145-138171253(score=369)	Regulation	SRX390399	level 1	Pluripotent stem cell	M.musculus
Tcf3	mmu-mir-25	chr5: 138171266(NM_001356576)	chr5: 138170810-138171401(score=1000)	Regulation	SRX2162541	level 1	Blood	M.musculus
Tead1	mmu-mir-25	chr5: 138171266(NM_001356576)	chr5: 138170864-138171269(score=1000)	Regulation	SRX2162568	level 1	Blood	M.musculus
Tead4	mmu-mir-25	chr5: 138171266(NM_001356576)	chr5: 138170867-138171328(score=1000)	Regulation	SRX1885856	level 1	Embryonic fibroblast	M.musculus
Tfap2a	mmu-mir-25	chr5: 138171266(NM_001356576)	chr5: 138172167-138172558(score=1000)	Regulation	SRX1225080	level 1	Epidermis	M.musculus
Tgif1	mmu-mir-25	chr5: 138171266(NM_001356576)	chr5: 138173328-138173455(score=405)	Regulation(feedback)	SRX475271	level 1	Blood	M.musculus
Trim33	mmu-mir-25	chr5: 138171852	chr5: 138171928-138172118(score=303)	Regulation	SRX218749	level 2	Blood	M.musculus
Trp53	mmu-mir-25	chr5: 138165818	chr5: 138165188-138165328(score=578)	Regulation	SRX270554	level 1	Embryonic fibroblast	M.musculus
Usf1	mmu-mir-25	chr5: 138171852	chr5: 138171777-138171994(score=1000)	Regulation	SRX142513	level 2	Muscle	M.musculus
Usf2	mmu-mir-25	chr5: 138171852	chr5: 138171785-138171990(score=1000)	Regulation	SRX140373	level 2	Blood	M.musculus
Vdr	mmu-mir-25	chr5: 138171266(NM_001356576)	chr5: 138170970-138171369(score=570)	Regulation	SRX423950	level 1	Bone	M.musculus
Wdr5	mmu-mir-25	chr5: 138171852	chr5: 138171788-138172080(score=748)	Regulation	SRX1815529	level 2	Blood	M.musculus
Xbp1	mmu-mir-25	chr5: 138171852	chr5: 138171770-138172013(score=472)	Regulation	SRX2053277	level 2	Liver	M.musculus
Zbtb17	mmu-mir-25	chr5: 138171266(NM_001356576)	chr5: 138170850-138171466(score=1000)	Regulation	SRX3113700	level 1	Blood	M.musculus
Zeb1	mmu-mir-25	chr5: 138171266(NM_001356576)	chr5: 138170965-138171338(score=947)	Regulation	ERX459475	level 1	Embryonic fibroblast	M.musculus
Zfp281	mmu-mir-25	chr5: 138171266(NM_001356576)	chr5: 138171515-138171897(score=1000)	Regulation	SRX1540623	level 1	Pluripotent stem cell	M.musculus
Zic1	mmu-mir-25	chr5: 138171266(NM_001356576)	chr5: 138171523-138172048(score=395)	Regulation	SRX685921	level 1	Neural	M.musculus
Ahr	mmu-mir-132	n/a	n/a	Activation	23818645	literature	n/a	M.musculus
Atf3	mmu-mir-132	chr11: 75173388	chr11: 75173493-75173701(score=360)	Regulation	SRX2901303	level 1	Blood	M.musculus
Brd4	mmu-mir-132	chr11: 75173388	chr11: 75169140-75169277(score=566)	Regulation	SRX2836972	level 1	Adipocyte	M.musculus
Btaf1	mmu-mir-132	chr11: 75173388	chr11: 75173132-75173691(score=1000)	Regulation	SRX2609731	level 1	Pluripotent stem cell	M.musculus
Cbfb	mmu-mir-132	chr11: 75173388	chr11: 75173279-75173727(score=472)	Regulation	SRX2389672	level 1	Blood	M.musculus
Creb1	mmu-mir-132	chr11: 75173388	chr11: 75173229-75173355(score=833)	Regulation	SRX1521009	level 1	Adipocyte	M.musculus
Crebbp	mmu-mir-132	n/a	n/a	Activation	25217442	literature	n/a	M.musculus
Crtc1	mmu-mir-132	n/a	n/a	Activation	26797246	literature	n/a	M.musculus
Crtc2	mmu-mir-132	chr11: 75173388	chr11: 75173204-75173375(score=512)	Regulation	SRX1822329	level 1	Embryonic fibroblast	M.musculus
Ctcf	mmu-mir-132	chr11: 75173388	chr11: 75169159-75169282(score=987)	Regulation	SRX1357086	level 1	Adipocyte	M.musculus
Dr1	mmu-mir-132	chr11: 75173388	chr11: 75168536-75169281(score=788)	Regulation	SRX2609733	level 1	Pluripotent stem cell	M.musculus
Ebf1	mmu-mir-132	chr11: 75173388	chr11: 75173197-75173324(score=515)	Regulation	SRX120424	level 1	Blood	M.musculus
Ebf2	mmu-mir-132	chr11: 75173388	chr11: 75173227-75173311(score=532)	Regulation	SRX1357069	level 1	Adipocyte	M.musculus
Egr1	mmu-mir-132	chr11: 75173388	chr11: 75173682-75173820(score=449)	Regulation	SRX204724	level 1	Liver	M.musculus
Egr2	mmu-mir-132	chr11: 75173388	chr11: 75170151-75170730(score=1000)	Regulation(feedback)	SRX270569	level 1	Blood	M.musculus
Ep300	mmu-mir-132	chr11: 75172563	chr11: 75172342-75172531(score=348)	Regulation(feedback)	SRX183950	level 2	Blood	M.musculus
Erg	mmu-mir-132	chr11: 75173388	chr11: 75170182-75170302(score=702)	Regulation	SRX884089	level 1	Blood	M.musculus
Erk1/2	mmu-mir-132	n/a	n/a	Regulation	20307261	literature	n/a	M.musculus
Ets1	mmu-mir-132	chr11: 75173388	chr11: 75173186-75173359(score=614)	Regulation(feedback)	SRX188794	level 1	Blood	M.musculus
Ezh2	mmu-mir-132	chr11: 75173388	chr11: 75172436-75172706(score=519)	Regulation	SRX330668	level 1	Pluripotent stem cell	M.musculus
Fli1	mmu-mir-132	chr11: 75173388	chr11: 75170183-75170321(score=767)	Regulation	SRX884087	level 1	Blood	M.musculus
Fos	mmu-mir-132	chr11: 75173388	chr11: 75170454-75170696(score=562)	Regulation	SRX2901288	level 1	Blood	M.musculus
Fosl1	mmu-mir-132	chr11: 75173388	chr11: 75170484-75170665(score=712)	Regulation	SRX2396480	level 1	Embryonic fibroblast	M.musculus
Fosl2	mmu-mir-132	chr11: 75173388	chr11: 75170496-75170693(score=1000)	Regulation	SRX187215	level 1	Blood	M.musculus
Foxa2	mmu-mir-132	chr11: 75173388	chr11: 75169775-75169955(score=640)	Regulation	SRX445035	level 1	Pancreas	M.musculus
Foxp3	mmu-mir-132	chr11: 75173388	chr11: 75173513-75173693(score=412)	Regulation	SRX2341417	level 1	Blood	M.musculus
Gabpa	mmu-mir-132	chr11: 75173388	chr11: 75173185-75173395(score=961)	Regulation	SRX188820	level 1	Blood	M.musculus
Gata1	mmu-mir-132	chr11: 75173388	chr11: 75169131-75169277(score=763)	Regulation	SRX188828	level 1	Blood	M.musculus
Gata2	mmu-mir-132	chr11: 75173388	chr11: 75169094-75169293(score=731)	Regulation	SRX206424	level 1	Blood	M.musculus
Gata4	mmu-mir-132	chr11: 75173388	chr11: 75169077-75169286(score=593)	Regulation	SRX373595	level 1	Cardiovascular	M.musculus
Gfi1	mmu-mir-132	chr11: 75173388	chr11: 75173189-75173346(score=534)	Regulation	SRX093162	level 1	Blood	M.musculus
Gnrh1	mmu-mir-132	n/a	n/a	Activation	19356622	literature	n/a	M.musculus
Gtf3c1	mmu-mir-132	chr11: 75173388	chr11: 75173188-75173621(score=485)	Regulation	SRX1688323	level 1	Pluripotent stem cell	M.musculus
Hdac1	mmu-mir-132	chr11: 75173388	chr11: 75173454-75173616(score=1000)	Regulation	SRX150192	level 1	Muscle	M.musculus
Hdac2	mmu-mir-132	chr11: 75173388	chr11: 75170295-75170542(score=276)	Regulation	SRX2599797	level 1	Embryonic fibroblast	M.musculus
Ino80	mmu-mir-132	chr11: 75173388	chr11: 75173291-75173754(score=1000)	Regulation	SRX2894852	level 1	Pluripotent stem cell	M.musculus
Irf4	mmu-mir-132	chr11: 75173388	chr11: 75173312-75173688(score=507)	Regulation	SRX2162565	level 1	Blood	M.musculus
Jun	mmu-mir-132	chr11: 75173388	chr11: 75170534-75170670(score=614)	Regulation	SRX1281904	level 1	Bone	M.musculus
Junb	mmu-mir-132	chr11: 75173388	chr11: 75173200-75173547(score=1000)	Regulation	SRX197290	level 1	Blood	M.musculus
Jund	mmu-mir-132	chr11: 75173388	chr11: 75170449-75170698(score=552)	Regulation	SRX2773923	level 1	Blood	M.musculus
Kdm1a	mmu-mir-132	chr11: 75173388	chr11: 75173074-75173590(score=522)	Regulation	ERX963289	level 1	Placenta	M.musculus
Kdm5a	mmu-mir-132	chr11: 75173388	chr11: 75169095-75169418(score=568)	Regulation(feedback)	SRX1949147	level 1	Embryonic fibroblast	M.musculus
Lmo2	mmu-mir-132	chr11: 75173388	chr11: 75169129-75169273(score=490)	Regulation	SRX310203	level 1	Blood	M.musculus
MSK	mmu-mir-132	n/a	n/a	Regulation	20307261	literature	n/a	M.musculus
Max	mmu-mir-132	chr11: 75173388	chr11: 75169162-75169288(score=479)	Regulation	SRX140371	level 1	Blood	M.musculus
Maz	mmu-mir-132	chr11: 75173388	chr11: 75170283-75170434(score=359)	Regulation	SRX188810	level 1	Blood	M.musculus
Mitf	mmu-mir-132	chr11: 75173388	chr11: 75170261-75170431(score=436)	Regulation	SRX310208	level 1	Blood	M.musculus
Mxi1	mmu-mir-132	chr11: 75173388	chr11: 75169161-75169276(score=369)	Regulation	SRX140388	level 1	Blood	M.musculus
Nanog	mmu-mir-132	chr11: 75173388	chr11: 75169114-75169286(score=644)	Regulation	ERX238066	level 1	Pluripotent stem cell	M.musculus
Nelfe	mmu-mir-132	chr11: 75173388	chr11: 75169162-75169263(score=350)	Regulation	SRX140387	level 1	Blood	M.musculus
Nipbl	mmu-mir-132	chr11: 75173388	chr11: 75173501-75173599(score=403)	Regulation	SRX320067	level 1	Blood	M.musculus
Npas3	mmu-mir-132	chr11: 75173388	chr11: 75173241-75173685(score=618)	Regulation	SRX1094550	level 1	Neural	M.musculus
Nr3c1	mmu-mir-132	chr11: 75173388	chr11: 75169131-75169260(score=478)	Regulation(feedback)	SRX821802	level 1	Adipocyte	M.musculus
Nrf1	mmu-mir-132	chr11: 75173388	chr11: 75173803-75173922(score=341)	Regulation	SRX994816	level 1	Pluripotent stem cell	M.musculus
Onecut2	mmu-mir-132	chr11: 75173388	chr11: 75173611-75173800(score=483)	Regulation	SRX1706977	level 1	Pluripotent stem cell	M.musculus
Otx2	mmu-mir-132	chr11: 75173388	chr11: 75173136-75173366(score=691)	Regulation	SRX499143	level 1	Pluripotent stem cell	M.musculus
Pou5f1	mmu-mir-132	chr11: 75173388	chr11: 75169136-75169282(score=669)	Regulation	ERX238062	level 1	Pluripotent stem cell	M.musculus
Pparg	mmu-mir-132	chr11: 75173388	chr11: 75169138-75169286(score=637)	Regulation	SRX202796	level 1	Embryonic fibroblast	M.musculus
Prdm9	mmu-mir-132	chr11: 75173388	chr11: 75171533-75171773(score=458)	Regulation	SRX2511194	level 1	Gonad	M.musculus
Rad21	mmu-mir-132	chr11: 75173388	chr11: 75169009-75169285(score=511)	Regulation	SRX2741802	level 1	Blood	M.musculus
Rbpj	mmu-mir-132	chr11: 75173388	chr11: 75173520-75173602(score=342)	Regulation	SRX070895	level 1	Blood	M.musculus
Rest	mmu-mir-132	chr11: 75173388	chr11: 75173077-75173230(score=1000)	Regulation	ERX112982	level 1	Liver	M.musculus
Rfx1	mmu-mir-132	chr11: 75173388	chr11: 75173602-75173788(score=1000)	Regulation	SRX1161944	level 1	Pancreas	M.musculus
Rfx2	mmu-mir-132	chr11: 75173388	chr11: 75173511-75173944(score=1000)	Regulation	SRX1011026	level 1	Gonad	M.musculus
Rfx3	mmu-mir-132	chr11: 75173388	chr11: 75173609-75173786(score=1000)	Regulation	SRX1161945	level 1	Pancreas	M.musculus
Rnf2	mmu-mir-132	chr11: 75173388	chr11: 75168489-75168898(score=289)	Regulation	SRX186550	level 1	Pluripotent stem cell	M.musculus
Rorc	mmu-mir-132	chr11: 75173388	chr11: 75173245-75173366(score=381)	Regulation	SRX2994536	level 1	Liver	M.musculus
Runx1	mmu-mir-132	chr11: 75173388	chr11: 75170206-75170631(score=971)	Regulation	SRX310206	level 1	Blood	M.musculus
Runx2	mmu-mir-132	chr11: 75173388	chr11: 75173515-75173703(score=548)	Regulation	SRX1487129	level 1	Blood	M.musculus
Runx3	mmu-mir-132	chr11: 75173388	chr11: 75173513-75173742(score=890)	Regulation(feedback)	SRX338019	level 1	Blood	M.musculus
Rxra	mmu-mir-132	chr11: 75173388	chr11: 75168864-75169358(score=492)	Regulation	SRX423962	level 1	Bone	M.musculus
Sap130	mmu-mir-132	chr11: 75173388	chr11: 75173302-75173607(score=502)	Regulation	SRX1568882	level 1	Embryo	M.musculus
Sin3a	mmu-mir-132	chr11: 75173388	chr11: 75173447-75173740(score=527)	Regulation	SRX188800	level 1	Blood	M.musculus
Smarca4	mmu-mir-132	chr11: 75173388	chr11: 75169058-75169275(score=426)	Regulation	SRX1815522	level 1	Blood	M.musculus
Smc1a	mmu-mir-132	chr11: 75173388	chr11: 75169101-75169333(score=1000)	Regulation	SRX700951	level 1	Blood	M.musculus
Smc3	mmu-mir-132	chr11: 75173388	chr11: 75169005-75169367(score=587)	Regulation	SRX2580290	level 1	Blood	M.musculus
Snai1	mmu-mir-132	chr11: 75173388	chr11: 75173486-75173574(score=667)	Regulation	SRX150189	level 1	Muscle	M.musculus
Spi1	mmu-mir-132	chr11: 75173388	chr11: 75169312-75169640(score=1000)	Regulation	SRX886478	level 1	Blood	M.musculus
Srf	mmu-mir-132	chr11: 75173388	chr11: 75170582-75170756(score=653)	Regulation	SRX180899	level 1	Embryonic fibroblast	M.musculus
Stag1	mmu-mir-132	chr11: 75173388	chr11: 75169080-75169323(score=941)	Regulation	SRX1499997	level 1	Embryonic fibroblast	M.musculus
Stag2	mmu-mir-132	chr11: 75173388	chr11: 75169130-75169285(score=938)	Regulation	ERX112994	level 1	Liver	M.musculus
Stat1	mmu-mir-132	chr11: 75173388	chr11: 75173230-75173515(score=943)	Regulation(feedback)	SRX197287	level 1	Blood	M.musculus
Stat3	mmu-mir-132	chr11: 75173388	chr11: 75170245-75170366(score=528)	Regulation(feedback)	SRX037909	level 1	Blood	M.musculus
Stat5a	mmu-mir-132	chr11: 75173388	chr11: 75173594-75173761(score=301)	Regulation	SRX2975359	level 1	Blood	M.musculus
Suz12	mmu-mir-132	chr11: 75173388	chr11: 75168470-75168843(score=388)	Regulation	SRX1662100	level 1	Pluripotent stem cell	M.musculus
Taf3	mmu-mir-132	chr11: 75173388	chr11: 75169183-75169276(score=458)	Regulation	SRX091892	level 1	Pluripotent stem cell	M.musculus
Tbx21	mmu-mir-132	chr11: 75173388	chr11: 75173541-75173852(score=838)	Regulation	SRX107338	level 1	Blood	M.musculus
Tcf12	mmu-mir-132	chr11: 75173388	chr11: 75169202-75169327(score=390)	Regulation	SRX390397	level 1	Pluripotent stem cell	M.musculus
Tcf3	mmu-mir-132	chr11: 75173388	chr11: 75173453-75173608(score=1000)	Regulation	SRX150191	level 1	Muscle	M.musculus
Tet2	mmu-mir-132	chr11: 75173388	chr11: 75173408-75173727(score=952)	Regulation(feedback)	SRX1387481	level 1	Blood	M.musculus
Tfap2a	mmu-mir-132	chr11: 75173388	chr11: 75170449-75170898(score=806)	Regulation	SRX1225080	level 1	Epidermis	M.musculus
Tfap2c	mmu-mir-132	chr11: 75173388	chr11: 75170461-75170646(score=855)	Regulation	SRX700365	level 1	Breast	M.musculus
Trim28	mmu-mir-132	chr11: 75173388	chr11: 75169092-75169326(score=867)	Regulation(feedback)	SRX2228737	level 1	Liver	M.musculus
Trim33	mmu-mir-132	chr11: 75173388	chr11: 75169172-75169351(score=681)	Regulation	SRX886483	level 1	Blood	M.musculus
Ubtf	mmu-mir-132	chr11: 75173388	chr11: 75169114-75169246(score=336)	Regulation	SRX188803	level 1	Blood	M.musculus
Vdr	mmu-mir-132	chr11: 75173388	chr11: 75170133-75170629(score=1000)	Regulation	SRX423950	level 1	Bone	M.musculus
Zbtb17	mmu-mir-132	chr11: 75173388	chr11: 75173653-75173949(score=620)	Regulation	SRX3113700	level 1	Blood	M.musculus
Zc3h11a	mmu-mir-132	chr11: 75173388	chr11: 75169146-75169317(score=625)	Regulation	SRX188812	level 1	Blood	M.musculus
Zfp281	mmu-mir-132	chr11: 75173388	chr11: 75173078-75173685(score=1000)	Regulation(feedback)	SRX1540623	level 1	Pluripotent stem cell	M.musculus
Zic1	mmu-mir-132	chr11: 75173388	chr11: 75173056-75173641(score=649)	Regulation	SRX685921	level 1	Neural	M.musculus
Zic3	mmu-mir-132	chr11: 75173388	chr11: 75173219-75173310(score=401)	Regulation	SRX147572	level 1	Pluripotent stem cell	M.musculus
Ar	mmu-mir-31	chr4: 88910662	chr4: 88910155-88910350(score=1000)	Regulation	SRX385392	level 1	Prostate	M.musculus
Batf	mmu-mir-31	chr4: 88910662	chr4: 88911475-88911646(score=619)	Regulation	SRX187192	level 1	Blood	M.musculus
Brd4	mmu-mir-31	chr4: 88942042(NR_132734)	chr4: 88942082-88942245(score=442)	Regulation(feedback)	SRX620285	level 1	Embryonic fibroblast	M.musculus
Cebpa	mmu-mir-31	chr4: 88910662	chr4: 88909755-88909841(score=458)	Regulation(feedback)	SRX884091	level 1	Blood	M.musculus
Cebpb	mmu-mir-31	chr4: 88910662	chr4: 88909925-88910209(score=1000)	Regulation	SRX661416	level 1	Liver	M.musculus
Creb1	mmu-mir-31	chr4: 88942042(NR_132734)	chr4: 88941833-88942236(score=342)	Regulation	SRX751011	level 1	Bone	M.musculus
Ctcf	mmu-mir-31	chr4: 88910662	chr4: 88912989-88913137(score=740)	Regulation	SRX188804	level 1	Blood	M.musculus
Ep300	mmu-mir-31	chr4: 88910662	chr4: 88911487-88911649(score=691)	Regulation(feedback)	SRX682465	level 1	Blood	M.musculus
Foxa2	mmu-mir-31	chr4: 88910662	chr4: 88909953-88910104(score=453)	Regulation	ERX112963	level 1	Liver	M.musculus
Gata4	mmu-mir-31	chr4: 88910662	chr4: 88910243-88910464(score=617)	Regulation	SRX327244	level 1	Liver	M.musculus
Hnf1a	mmu-mir-31	chr4: 88910662	chr4: 88909963-88910101(score=552)	Regulation	ERX113009	level 1	Liver	M.musculus
Hnf4a	mmu-mir-31	chr4: 88910662	chr4: 88909967-88910241(score=704)	Regulation	SRX2375607	level 1	Liver	M.musculus
Myc	mmu-mir-31	chr4: 88910662	chr4: 88909988-88910410(score=806)	Regulation	SRX1486523	level 1	Liver	M.musculus
Nkx6-1	mmu-mir-31	chr4: 88910662	chr4: 88909979-88910139(score=1000)	Regulation	SRX188610	level 1	Pancreas	M.musculus
Nr1d1	mmu-mir-31	chr4: 88910662	chr4: 88909998-88910159(score=381)	Regulation	SRX1881571	level 1	Liver	M.musculus
Nr1d2	mmu-mir-31	chr4: 88910662	chr4: 88909974-88910190(score=573)	Regulation(feedback)	SRX109462	level 1	Liver	M.musculus
Nr3c1	mmu-mir-31	chr4: 88910662	chr4: 88913218-88913405(score=344)	Regulation	SRX268257	level 1	Breast	M.musculus
Prox1	mmu-mir-31	chr4: 88910662	chr4: 88909932-88910269(score=1000)	Regulation	SRX2375601	level 1	Liver	M.musculus
Cebpb	mmu-mir-181b	n/a	n/a	Activation	27430527	literature	n/a	M.musculus
Stat3	mmu-mir-181b	n/a	n/a	Activation	27430527	literature	n/a	M.musculus
Cebpa	mmu-mir-192	chr19: 6264643	chr19: 6262353-6262499(score=676)	Regulation	SRX884092	level 1	Blood	M.musculus
Cebpb	mmu-mir-192	chr19: 6264643	chr19: 6262310-6262511(score=508)	Regulation	SRX204712	level 1	Liver	M.musculus
Clock	mmu-mir-192	chr19: 6264643	chr19: 6263342-6264370(score=844)	Regulation(feedback)	SRX414999	level 1	Liver	M.musculus
Ctcf	mmu-mir-192	chr19: 6264643	chr19: 6262342-6262471(score=1000)	Regulation	SRX1357085	level 1	Adipocyte	M.musculus
E2f4	mmu-mir-192	chr19: 6264643	chr19: 6265028-6265197(score=641)	Regulation	SRX019010	level 1	Liver	M.musculus
Ep300	mmu-mir-192	chr19: 6264643	chr19: 6262371-6262456(score=445)	Regulation	SRX884083	level 1	Blood	M.musculus
Esr1	mmu-mir-192	chr19: 6264643	chr19: 6263076-6263338(score=810)	Regulation	SRX377391	level 1	Liver	M.musculus
Ets1	mmu-mir-192	n/a	n/a	Repression	23737551	literature	n/a	M.musculus
Gtf2b	mmu-mir-192	chr19: 6264643	chr19: 6263107-6263419(score=1000)	Regulation	SRX547086	level 1	Liver	M.musculus
Gtf2e2	mmu-mir-192	chr19: 6264643	chr19: 6263119-6263422(score=908)	Regulation	SRX547088	level 1	Liver	M.musculus
Hdac3	mmu-mir-192	chr19: 6264643	chr19: 6263172-6263333(score=413)	Regulation(feedback)	SRX2039594	level 1	Liver	M.musculus
Hnf1a	mmu-mir-192	chr19: 6264643	chr19: 6263122-6263282(score=625)	Regulation	ERX112996	level 1	Liver	M.musculus
Hnf4a	mmu-mir-192	chr19: 6264643	chr19: 6263022-6263275(score=830)	Regulation	SRX2369877	level 1	Digestive tract	M.musculus
Hnf4g	mmu-mir-192	chr19: 6264643	chr19: 6263026-6263280(score=910)	Regulation	SRX2369884	level 1	Digestive tract	M.musculus
Med1	mmu-mir-192	chr19: 6264643	chr19: 6262363-6262460(score=396)	Regulation(feedback)	SRX1403505	level 1	Blood	M.musculus
Myc	mmu-mir-192	chr19: 6264643	chr19: 6263161-6263504(score=456)	Regulation	SRX1486523	level 1	Liver	M.musculus
Nr1d1	mmu-mir-192	chr19: 6264643	chr19: 6263113-6263252(score=423)	Regulation	SRX109461	level 1	Liver	M.musculus
Nr3c1	mmu-mir-192	chr19: 6264643	chr19: 6262347-6262480(score=576)	Regulation	SRX821805	level 1	Adipocyte	M.musculus
Onecut1	mmu-mir-192	chr19: 6264643	chr19: 6263071-6263309(score=1000)	Regulation	SRX668177	level 1	Liver	M.musculus
Pparg	mmu-mir-192	chr19: 6264643	chr19: 6262348-6262458(score=516)	Regulation	SRX202796	level 1	Embryonic fibroblast	M.musculus
Rad21	mmu-mir-192	chr19: 6264643	chr19: 6260556-6260732(score=1000)	Regulation	SRX140374	level 1	Blood	M.musculus
Rela	mmu-mir-192	chr19: 6264643	chr19: 6264291-6264452(score=491)	Regulation	SRX319890	level 1	Blood	M.musculus
Rxra	mmu-mir-192	chr19: 6264643	chr19: 6263094-6263334(score=675)	Regulation	SRX020176	level 1	Liver	M.musculus
Smad2	mmu-mir-192	n/a	n/a	Activation	23737551	literature	n/a	M.musculus
Smad3	mmu-mir-192	n/a	n/a	Activation	23737551	literature	n/a	M.musculus
Smarca4	mmu-mir-192	chr19: 6264643	chr19: 6262382-6262498(score=398)	Regulation	SRX1642503	level 1	Blood	M.musculus
Smc1a	mmu-mir-192	chr19: 6264643	chr19: 6262286-6262518(score=1000)	Regulation	SRX700951	level 1	Blood	M.musculus
Smc3	mmu-mir-192	chr19: 6264643	chr19: 6260594-6260740(score=713)	Regulation	SRX140393	level 1	Blood	M.musculus
Spi1	mmu-mir-192	chr19: 6264643	chr19: 6262217-6262558(score=1000)	Regulation	SRX498823	level 1	Blood	M.musculus
Srf	mmu-mir-192	chr19: 6264643	chr19: 6262332-6262497(score=687)	Regulation	SRX180899	level 1	Embryonic fibroblast	M.musculus
Stag1	mmu-mir-192	chr19: 6264643	chr19: 6262356-6262492(score=507)	Regulation	ERX112976	level 1	Liver	M.musculus
Stag2	mmu-mir-192	chr19: 6264643	chr19: 6262353-6262493(score=779)	Regulation	ERX112994	level 1	Liver	M.musculus
Trim28	mmu-mir-192	chr19: 6264643	chr19: 6265451-6265632(score=1000)	Regulation	SRX1421937	level 1	Pluripotent stem cell	M.musculus
Zc3h11a	mmu-mir-192	chr19: 6264643	chr19: 6262340-6262479(score=778)	Regulation	SRX188796	level 1	Blood	M.musculus
Arntl	mmu-mir-455	chr4: 63256851	chr4: 63257379-63257581(score=429)	Regulation	SRX415001	level 1	Liver	M.musculus
Bcl11b	mmu-mir-455	chr4: 63215412	chr4: 63215223-63215484(score=500)	Regulation	SRX2399084	level 2	Blood	M.musculus
Bmp7	mmu-mir-455	n/a	n/a	Activation	26303948	literature	n/a	M.musculus
Btaf1	mmu-mir-455	chr4: 63215412(NM_025685)	chr4: 63213974-63214402(score=670)	Regulation	SRX2609731	level 1	Pluripotent stem cell	M.musculus
Cbx7	mmu-mir-455	chr4: 63215412(NM_025685)	chr4: 63213989-63215063(score=898)	Regulation	SRX2254004	level 1	Pluripotent stem cell	M.musculus
Cebpa	mmu-mir-455	chr4: 63256851	chr4: 63252194-63252313(score=515)	Regulation	SRX1092950	level 1	Liver	M.musculus
Cebpb	mmu-mir-455	chr4: 63215412(NM_025685)	chr4: 63214395-63214595(score=614)	Regulation	SRX204712	level 1	Liver	M.musculus
Clock	mmu-mir-455	chr4: 63215412(NM_025685)	chr4: 63215443-63215660(score=632)	Regulation	SRX414999	level 1	Liver	M.musculus
Ctcf	mmu-mir-455	chr4: 63215412	chr4: 63215236-63215387(score=1000)	Regulation	SRX1357085	level 2	Adipocyte	M.musculus
Dr1	mmu-mir-455	chr4: 63215412(NM_025685)	chr4: 63213950-63214488(score=947)	Regulation	SRX2894853	level 1	Pluripotent stem cell	M.musculus
Ebf2	mmu-mir-455	chr4: 63215412(NM_025685)	chr4: 63215996-63216210(score=615)	Regulation	SRX1706969	level 1	Pluripotent stem cell	M.musculus
Elf5	mmu-mir-455	chr4: 63215412(NM_025685)	chr4: 63213233-63213438(score=874)	Regulation	SRX1672063	level 1	Breast	M.musculus
Esr1	mmu-mir-455	chr4: 63256851	chr4: 63256449-63256619(score=528)	Regulation	SRX377391	level 1	Liver	M.musculus
Ezh2	mmu-mir-455	chr4: 63215412(NM_025685)	chr4: 63213972-63214447(score=1000)	Regulation	SRX330668	level 1	Pluripotent stem cell	M.musculus
Foxa1	mmu-mir-455	chr4: 63256851	chr4: 63257288-63257533(score=566)	Regulation	ERX204070	level 1	Liver	M.musculus
Foxa2	mmu-mir-455	chr4: 63256851	chr4: 63257296-63257534(score=1000)	Regulation	ERX112963	level 1	Liver	M.musculus
Foxl2	mmu-mir-455	chr4: 63215412(NM_025685)	chr4: 63213610-63213763(score=403)	Regulation	SRX737010	level 1	Gonad	M.musculus
Hdac2	mmu-mir-455	chr4: 63215412(NM_025685)	chr4: 63215287-63215539(score=590)	Regulation	SRX2599797	level 1	Embryonic fibroblast	M.musculus
Hdac3	mmu-mir-455	chr4: 63256851	chr4: 63257378-63257550(score=391)	Regulation	SRX2375598	level 1	Liver	M.musculus
Hnf4a	mmu-mir-455	chr4: 63256851	chr4: 63252145-63252372(score=811)	Regulation	SRX2375608	level 1	Liver	M.musculus
Ino80	mmu-mir-455	chr4: 63215412(NM_025685)	chr4: 63214021-63214447(score=815)	Regulation	SRX2894852	level 1	Pluripotent stem cell	M.musculus
Jarid2	mmu-mir-455	chr4: 63215412(NM_025685)	chr4: 63214074-63214655(score=550)	Regulation	SRX015778	level 1	Pluripotent stem cell	M.musculus
Kdm2b	mmu-mir-455	chr4: 63215412(NM_025685)	chr4: 63214436-63214751(score=516)	Regulation	SRX186548	level 1	Pluripotent stem cell	M.musculus
Kdm4c	mmu-mir-455	chr4: 63215412	chr4: 63215269-63215354(score=339)	Regulation	SRX213793	level 2	Pluripotent stem cell	M.musculus
Kdm5a	mmu-mir-455	chr4: 63215412	chr4: 63215172-63215477(score=396)	Regulation	SRX1949147	level 2	Embryonic fibroblast	M.musculus
Mta2	mmu-mir-455	chr4: 63215412(NM_025685)	chr4: 63214224-63214475(score=574)	Regulation	SRX1205896	level 1	Blood	M.musculus
Myc	mmu-mir-455	chr4: 63215412(NM_025685)	chr4: 63214048-63214592(score=293)	Regulation	SRX2522383	level 1	Blood	M.musculus
Nanog	mmu-mir-455	chr4: 63215412(NM_025685)	chr4: 63214105-63214310(score=549)	Regulation	ERX238064	level 1	Pluripotent stem cell	M.musculus
Ncor1	mmu-mir-455	chr4: 63256851	chr4: 63257387-63257542(score=337)	Regulation(feedback)	SRX100294	level 1	Liver	M.musculus
Nfib	mmu-mir-455	chr4: 63256851	chr4: 63257513-63257636(score=561)	Regulation	SRX1672030	level 1	Breast	M.musculus
Nfil3	mmu-mir-455	chr4: 63256851	chr4: 63257355-63257608(score=702)	Regulation	SRX655369	level 1	Liver	M.musculus
Nkx2-5	mmu-mir-455	chr4: 63256851	chr4: 63257509-63257623(score=470)	Regulation	SRX116273	level 1	Cardiovascular	M.musculus
Nr1d1	mmu-mir-455	chr4: 63256851	chr4: 63257312-63257577(score=756)	Regulation	SRX1881570	level 1	Liver	M.musculus
Nr1d2	mmu-mir-455	chr4: 63256851	chr4: 63252176-63252379(score=585)	Regulation	SRX109462	level 1	Liver	M.musculus
Nr3c1	mmu-mir-455	chr4: 63215412	chr4: 63215301-63215418(score=324)	Regulation	SRX821802	level 2	Adipocyte	M.musculus
Nrf1	mmu-mir-455	chr4: 63215412(NM_025685)	chr4: 63214403-63214734(score=841)	Regulation	SRX994816	level 1	Pluripotent stem cell	M.musculus
Onecut1	mmu-mir-455	chr4: 63256851	chr4: 63252169-63252406(score=911)	Regulation	SRX668177	level 1	Liver	M.musculus
Otx2	mmu-mir-455	chr4: 63215412(NM_025685)	chr4: 63213901-63214069(score=478)	Regulation	SRX499143	level 1	Pluripotent stem cell	M.musculus
Pou5f1	mmu-mir-455	chr4: 63215412	chr4: 63215266-63215387(score=489)	Regulation	ERX238063	level 2	Pluripotent stem cell	M.musculus
Pparg	mmu-mir-455	chr4: 63215412	chr4: 63215235-63215414(score=934)	Regulation	SRX202796	level 2	Embryonic fibroblast	M.musculus
Prdm5	mmu-mir-455	chr4: 63256851	chr4: 63253583-63253798(score=1000)	Regulation	SRX731122	level 1	Bone	M.musculus
Prox1	mmu-mir-455	chr4: 63256851	chr4: 63252139-63252407(score=1000)	Regulation	SRX2375601	level 1	Liver	M.musculus
Rad21	mmu-mir-455	chr4: 63215412	chr4: 63215144-63215494(score=1000)	Regulation	SRX1815540	level 2	Blood	M.musculus
Rag2	mmu-mir-455	chr4: 63215412	chr4: 63215272-63215425(score=427)	Regulation	SRX1046550	level 2	Blood	M.musculus
Rnf2	mmu-mir-455	chr4: 63215412(NM_025685)	chr4: 63213954-63214844(score=1000)	Regulation	SRX186547	level 1	Pluripotent stem cell	M.musculus
Runx2	mmu-mir-455	chr4: 63256851	chr4: 63253818-63254024(score=519)	Regulation(feedback)	SRX425486	level 1	Bone	M.musculus
Rxra	mmu-mir-455	chr4: 63256851	chr4: 63253758-63254023(score=317)	Regulation	SRX423962	level 1	Bone	M.musculus
Smarca4	mmu-mir-455	chr4: 63215412(NM_025685)	chr4: 63215201-63215539(score=793)	Regulation	SRX1815522	level 1	Blood	M.musculus
Smc1a	mmu-mir-455	chr4: 63215412	chr4: 63215226-63215418(score=865)	Regulation	SRX700951	level 2	Blood	M.musculus
Smc3	mmu-mir-455	chr4: 63215412	chr4: 63215115-63215511(score=903)	Regulation	SRX2580292	level 2	Blood	M.musculus
Sox9	mmu-mir-455	chr4: 63256851	chr4: 63253847-63254046(score=444)	Regulation	SRX1035108	level 1	Bone	M.musculus
Srf	mmu-mir-455	chr4: 63215412	chr4: 63215210-63215409(score=995)	Regulation	SRX180899	level 2	Embryonic fibroblast	M.musculus
Stag1	mmu-mir-455	chr4: 63215412	chr4: 63215202-63215484(score=1000)	Regulation	SRX1499997	level 2	Embryonic fibroblast	M.musculus
Stag2	mmu-mir-455	chr4: 63215412	chr4: 63215234-63215415(score=1000)	Regulation	ERX112994	level 2	Liver	M.musculus
Stat5a	mmu-mir-455	chr4: 63256851	chr4: 63257386-63257599(score=443)	Regulation	SRX094457	level 1	Liver	M.musculus
Suz12	mmu-mir-455	chr4: 63215412(NM_025685)	chr4: 63213832-63214781(score=1000)	Regulation	SRX1662100	level 1	Pluripotent stem cell	M.musculus
Tbp	mmu-mir-455	chr4: 63215412	chr4: 63215270-63215499(score=1000)	Regulation	SRX202800	level 2	Embryonic fibroblast	M.musculus
Tcf3	mmu-mir-455	chr4: 63215412(NM_025685)	chr4: 63213966-63214184(score=511)	Regulation	SRX1080393	level 1	Pluripotent stem cell	M.musculus
Tead4	mmu-mir-455	chr4: 63256851	chr4: 63252033-63252494(score=950)	Regulation	SRX1885943	level 1	Liver	M.musculus
Tfap2a	mmu-mir-455	chr4: 63256851	chr4: 63252153-63252384(score=483)	Regulation	SRX1225081	level 1	Epidermis	M.musculus
Xbp1	mmu-mir-455	chr4: 63256851	chr4: 63257350-63257661(score=610)	Regulation	SRX2053276	level 1	Liver	M.musculus
Zfp281	mmu-mir-455	chr4: 63215412(NM_025685)	chr4: 63213854-63214182(score=1000)	Regulation	SRX1540623	level 1	Pluripotent stem cell	M.musculus
Zic1	mmu-mir-455	chr4: 63215412(NM_025685)	chr4: 63215396-63215920(score=847)	Regulation	SRX685921	level 1	Neural	M.musculus
Btaf1	mmu-mir-187	chr18: 24429170	chr18: 24429781-24430153(score=519)	Regulation	SRX2894851	level 1	Pluripotent stem cell	M.musculus
Ctcf	mmu-mir-187	chr18: 24429170	chr18: 24429147-24429521(score=1000)	Regulation	SRX285626	level 1	Blood	M.musculus
Ctcfl	mmu-mir-187	chr18: 24429170	chr18: 24429277-24429387(score=394)	Regulation	SRX1091833	level 1	Gonad	M.musculus
Dr1	mmu-mir-187	chr18: 24429170	chr18: 24429778-24430092(score=378)	Regulation	SRX2609733	level 1	Pluripotent stem cell	M.musculus
Ino80	mmu-mir-187	chr18: 24429170	chr18: 24429800-24430154(score=427)	Regulation	SRX2894852	level 1	Pluripotent stem cell	M.musculus
Myf5	mmu-mir-187	chr18: 24429170	chr18: 24432166-24432435(score=592)	Regulation	SRX1451508	level 1	Embryonic fibroblast	M.musculus
Myod1	mmu-mir-187	chr18: 24429170	chr18: 24432221-24432425(score=1000)	Regulation	SRX114684	level 1	Embryonic fibroblast	M.musculus
Neurog2	mmu-mir-187	chr18: 24429170	chr18: 24429136-24429321(score=333)	Regulation	SRX1706938	level 1	Pluripotent stem cell	M.musculus
Rad21	mmu-mir-187	chr18: 24429170	chr18: 24429171-24429486(score=1000)	Regulation	SRX1815540	level 1	Blood	M.musculus
Ascl1	mmu-mir-200a	chr4: 156059802(NR_132444)	chr4: 156063884-156064160(score=1000)	Regulation	ERX420215	level 1	Neural	M.musculus
Ctcf	mmu-mir-200a	chr4: 156055750	chr4: 156055268-156055466(score=646)	Regulation	SRX2737319	level 1	Breast	M.musculus
Dmc1	mmu-mir-200a	chr4: 156055750	chr4: 156054934-156055761(score=1000)	Regulation	SRX1452676	level 1	Gonad	M.musculus
Ebf2	mmu-mir-200a	chr4: 156059802(NR_132444)	chr4: 156063951-156064189(score=690)	Regulation	SRX1706969	level 1	Pluripotent stem cell	M.musculus
Ebf4	mmu-mir-200a	chr4: 156059802(NR_132444)	chr4: 156060680-156061016(score=1000)	Regulation	SRX2487349	level 1	Neural	M.musculus
Ep300	mmu-mir-200a	chr4: 156059802(NR_132444)	chr4: 156064032-156064328(score=413)	Regulation	SRX2270102	level 1	Pluripotent stem cell	M.musculus
Foxf1	mmu-mir-200a	chr4: 156059817	chr4: 156059760-156059837(score=394)	Regulation	SRX1585633	level 2	Lung	M.musculus
Hnf1b	mmu-mir-200a	n/a	n/a	Activation	26292219	literature	n/a	M.musculus
Lhx2	mmu-mir-200a	chr4: 156059802(NR_132444)	chr4: 156060635-156061080(score=1000)	Regulation	SRX2487346	level 1	Neural	M.musculus
Nanog	mmu-mir-200a	chr4: 156055750	chr4: 156055139-156055276(score=378)	Regulation	ERX238064	level 1	Pluripotent stem cell	M.musculus
Nelfa	mmu-mir-200a	chr4: 156055750	chr4: 156059702-156059850(score=407)	Regulation	SRX017058	level 1	Pluripotent stem cell	M.musculus
Nfib	mmu-mir-200a	chr4: 156059802(NR_132444)	chr4: 156064647-156064742(score=414)	Regulation	SRX1672030	level 1	Breast	M.musculus
Nfyc	mmu-mir-200a	chr4: 156059817	chr4: 156059773-156060054(score=976)	Regulation	SRX518335	level 2	Pluripotent stem cell	M.musculus
Olig2	mmu-mir-200a	chr4: 156059802(NR_132444)	chr4: 156063975-156064125(score=660)	Regulation	ERX380399	level 1	Neural	M.musculus
Pgr	mmu-mir-200a	chr4: 156055750	chr4: 156059711-156059886(score=707)	Regulation	SRX114724	level 1	Uterus	M.musculus
Pitx2	mmu-mir-200a	n/a	n/a	Activation	25122764	literature	n/a	M.musculus
Pou5f1	mmu-mir-200a	n/a	n/a	Activation	23386720	literature	n/a	M.musculus
Ptf1a	mmu-mir-200a	chr4: 156059817	chr4: 156059852-156060055(score=290)	Regulation	SRX2069639	level 2	Pancreas	M.musculus
Smad2	mmu-mir-200a	chr4: 156055750	chr4: 156059239-156059343(score=446)	Regulation	SRX390396	level 1	Pluripotent stem cell	M.musculus
Sox17	mmu-mir-200a	chr4: 156055750	chr4: 156055363-156055470(score=491)	Regulation	SRX214076	level 1	Pluripotent stem cell	M.musculus
Sox2	mmu-mir-200a	n/a	n/a	Activation	23386720	literature	n/a	M.musculus
Spi1	mmu-mir-200a	chr4: 156055750	chr4: 156054791-156055074(score=1000)	Regulation	SRX348402	level 1	Blood	M.musculus
Stat3	mmu-mir-200a	chr4: 156059817	chr4: 156059719-156059891(score=719)	Regulation	SRX2088125	level 2	Breast	M.musculus
Stat5a	mmu-mir-200a	chr4: 156059802(NR_132444)	chr4: 156061380-156061617(score=477)	Regulation	SRX2564309	level 1	Breast	M.musculus
Tbp	mmu-mir-200a	chr4: 156059817	chr4: 156059755-156059910(score=585)	Regulation	SRX022047	level 2	Pluripotent stem cell	M.musculus
Tcf12	mmu-mir-200a	chr4: 156055750	chr4: 156055327-156055430(score=487)	Regulation	SRX390392	level 1	Pluripotent stem cell	M.musculus
Tfap2c	mmu-mir-200a	chr4: 156059802(NR_132444)	chr4: 156064199-156064351(score=410)	Regulation	SRX700365	level 1	Breast	M.musculus
Utf1	mmu-mir-200a	chr4: 156055750	chr4: 156059716-156060099(score=439)	Regulation	SRX404068	level 1	Pluripotent stem cell	M.musculus
Vdr	mmu-mir-200a	chr4: 156055750	chr4: 156054986-156055346(score=416)	Regulation	SRX1037022	level 1	Digestive tract	M.musculus
Yy1	mmu-mir-200a	chr4: 156055750	chr4: 156058967-156059191(score=320)	Regulation	SRX2873907	level 1	Pluripotent stem cell	M.musculus
Zfp281	mmu-mir-200a	chr4: 156059817	chr4: 156059835-156060094(score=1000)	Regulation	SRX1540623	level 2	Pluripotent stem cell	M.musculus
Bcl11b	mmu-mir-188-5p	chrX: 7319229	chrX: 7319251-7319469(score=377)	Regulation	SRX2487652	level 2	Blood	M.musculus
Btaf1	mmu-mir-188-5p	chrX: 7319358(NM_001243762)	chrX: 7318711-7319307(score=934)	Regulation	SRX2609731	level 1	Pluripotent stem cell	M.musculus
Cbx7	mmu-mir-188-5p	chrX: 7319358(NM_001243762)	chrX: 7318617-7318838(score=299)	Regulation	SRX2254004	level 1	Pluripotent stem cell	M.musculus
Cebpa	mmu-mir-188-5p	chrX: 7248497	chrX: 7250491-7250606(score=562)	Regulation	SRX1357065	level 1	Adipocyte	M.musculus
Cebpb	mmu-mir-188-5p	chrX: 7319229	chrX: 7319288-7319455(score=521)	Regulation	SRX661416	level 2	Liver	M.musculus
Ctcf	mmu-mir-188-5p	chrX: 7319358(NM_001243762)	chrX: 7322430-7322539(score=613)	Regulation	SRX1357083	level 1	Adipocyte	M.musculus
Foxh1	mmu-mir-377	n/a	n/a	Activation	23390484	literature	n/a	M.musculus
Smad2	mmu-mir-377	n/a	n/a	Activation	23390484	literature	n/a	M.musculus
Smad3	mmu-mir-377	n/a	n/a	Activation	23390484	literature	n/a	M.musculus
Srf	mmu-mir-377	n/a	n/a	Activation	19004760	literature	n/a	M.musculus

## Sheet: TF name
274 TF name
Akt1
Bcl6
Cebpa
Cebpb
Gfi1
Grhl3
Jun
Nfkb1
Rela
Rest
Smad2
Smad3
Smad4
Spi1
Stat3
Stat5a
Aff3
Atf4
Bcl11b
Bhlhe40
Brd4
Cbfb
Cebpd
Cebpe
Chd2
Chd4
Creb1
Ctcf
Dr1
E2f4
Ebf2
Egr2
Elf4
Elf5
Ell3
Ep300
Erf
Erg
Esr1
Ets1
Fli1
Foxp3
Gata1
Gata2
Gata4
Hcfc1
Hdac1
Hdac2
Hdac3
Hnf4a
Ikzf1
Insm1
Junb
Jund
Kat2a
Kdm4c
Kdm5a
Klf3
Kmt2a
Kmt2b
Max
Maz
Mbd3
Med1
Meis1
Msl2
Mxi1
Myb
Myc
Nelfa
Nelfe
Nfib
Nr1d1
Nr1d2
Nr3c1
Nrf1
Nsd3
Pgr
Pou2f1
Pou5f1
Pparg
Prdm16
Rad21
Rag2
Rbfox2
Rcor1
Rnf2
Runx1
Rxra
Sap130
Sin3a
Smarca4
Smc1a
Smc3
Snai1
Sp1
Srf
Stat1
Stat5b
Stat6
Tbp
Tbx5
Tcf3
Tcf4
Tcf7
Tfap2a
Tgif1
Usf1
Usf2
Vdr
Wdr5
Yy1
Zc3h11a
Zfp281
Zfp384
Zic1
Zmiz1
Gata3
Hnf1b
Hoxb4
Il1b
Il6
Kdm1a
Lmo2
Lyl1
Mafb
Tal1
Trim33
Atf3
Atrx
Bach2
Batf
Batf3
Epop
Etv6
Fos
Fosl2
Gtf2b
Hoxa13
Irf1
Irf4
Irf8
Maf
Nanog
Rbpj
Stat2
Supt5
Brd2
Btaf1
Crebbp
Dmc1
E2f1
E2f3
Ebf1
Foxa2
Gabpa
Gtf3c1
Ino80
Kat5
Kdm2b
Kdm6a
Kmt2d
Men1
Mybl1
Ncapd3
Ncaph2
Neurod1
Otx2
Pbx1
Pitx2
Pknox1
Prdm13
Ptf1a
Rag1
Rfx1
Runx2
Sirt1
Smad1
Stat4
Taf7l
Tead4
Tfap2c
Xbp1
Zfp143
Zfp42
Zfp57
Pou2af1
Trp53
Ezh2
Hif1a
Mta2
Myod1
Neurod2
Olig2
Prdm1
Runx3
Satb1
Stag1
Suz12
Taf3
Tbx21
Tcf12
Tead1
Zbtb17
Atf2
Crtc2
Fosl1
Hoxd13
Hsf1
Mafk
Med12
Nelfb
Nipbl
Twist1
Zeb1
Nfatc1
Ar
Arntl
Clock
Dgcr8
Elf1
Foxa1
Foxf1
Foxk1
Hnf4g
Kansl3
Myf5
Nfyb
Nkx6-1
Npas3
Nr5a2
Onecut2
Rfx2
Rfx3
Six4
Smad5
Sox4
Sox9
Ahr
Crtc1
Egr1
Erk1/2
Gnrh1
MSK
Mitf
Prdm9
Rorc
Stag2
Tet2
Trim28
Ubtf
Zic3
Hnf1a
Prox1
Gtf2e2
Onecut1
Bmp7
Cbx7
Foxl2
Jarid2
Ncor1
Nfil3
Nkx2-5
Prdm5
Ctcfl
Neurog2
Ascl1
Ebf4
Lhx2
Nfyc
Sox17
Sox2
Utf1
Foxh1

## Sheet: Differential expression TFs
13 TFs with different expression
Cebpb
Atf4
Egr2
Junb
Snai1
Fos
Fosl2
Fosl1
Mafk
Sox4
Sox9
Egr1
Nfil3

## Sheet: 13 TFs and their miRNAs
TF name	miRNA name	TSS	Binding site	Action type	SRAID/PMID	Evidence	Tissue	Species
Cebpb	mmu-mir-21	n/a	n/a	Activation	27430527	literature	n/a	M.musculus
Cebpb	mmu-mir-146b	chr19: 46342762	chr19: 46339875-46339978(score=653)	Regulation	SRX341415	level 1	Adipocyte	M.musculus
Cebpb	mmu-mir-146b	chr19: 46342762	chr19: 46339738-46340080(score=1000)	Regulation	SRX2901279	level 1	Blood	M.musculus
Cebpb	mmu-mir-146b	chr19: 46342762	chr19: 46339744-46340084(score=1000)	Regulation	SRX742832	level 1	Blood	M.musculus
Cebpb	mmu-mir-146b	chr19: 46342762	chr19: 46339749-46340090(score=1000)	Regulation	SRX2417361	level 1	Blood	M.musculus
Cebpb	mmu-mir-146b	chr19: 46342762	chr19: 46339756-46340067(score=1000)	Regulation	SRX2901278	level 1	Blood	M.musculus
Cebpb	mmu-mir-146b	chr19: 46342762	chr19: 46339773-46340054(score=690)	Regulation	SRX2901275	level 1	Blood	M.musculus
Cebpb	mmu-mir-146b	chr19: 46342762	chr19: 46339789-46340059(score=1000)	Regulation	SRX1939437	level 1	Blood	M.musculus
Cebpb	mmu-mir-146b	chr19: 46342762	chr19: 46339793-46340019(score=554)	Regulation	SRX2901277	level 1	Blood	M.musculus
Cebpb	mmu-mir-146b	chr19: 46342762	chr19: 46339829-46339996(score=599)	Regulation	SRX122502	level 1	Blood	M.musculus
Cebpb	mmu-mir-146b	chr19: 46342762	chr19: 46339829-46340062(score=540)	Regulation	SRX2901276	level 1	Blood	M.musculus
Cebpb	mmu-mir-146b	chr19: 46342762	chr19: 46339830-46339999(score=890)	Regulation	SRX122501	level 1	Blood	M.musculus
Cebpb	mmu-mir-146b	chr19: 46342762	chr19: 46339834-46339972(score=494)	Regulation	SRX1686487	level 1	Blood	M.musculus
Cebpb	mmu-mir-146b	chr19: 46342762	chr19: 46339868-46339973(score=593)	Regulation	SRX019137	level 1	Blood	M.musculus
Cebpb	mmu-mir-146b	chr19: 46342762	chr19: 46339720-46340087(score=1000)	Regulation	SRX201997	level 1	Bone	M.musculus
Cebpb	mmu-mir-146b	chr19: 46342762	chr19: 46339750-46340068(score=1000)	Regulation	SRX423964	level 1	Bone	M.musculus
Cebpb	mmu-mir-146b	chr19: 46342762	chr19: 46339790-46340048(score=1000)	Regulation	SRX423953	level 1	Bone	M.musculus
Cebpb	mmu-mir-146b	chr19: 46342762	chr19: 46339800-46340034(score=918)	Regulation	SRX201979	level 1	Bone	M.musculus
Cebpb	mmu-mir-146b	chr19: 46342762	chr19: 46339767-46340037(score=786)	Regulation	SRX047640	level 1	Embryonic fibroblast	M.musculus
Cebpb	mmu-mir-146b	chr19: 46342762	chr19: 46339781-46340019(score=864)	Regulation	SRX515668	level 1	Embryonic fibroblast	M.musculus
Cebpb	mmu-mir-146b	chr19: 46342762	chr19: 46339789-46340007(score=653)	Regulation	SRX047642	level 1	Embryonic fibroblast	M.musculus
Cebpb	mmu-mir-146b	chr19: 46342762	chr19: 46339800-46340018(score=779)	Regulation	SRX047641	level 1	Embryonic fibroblast	M.musculus
Cebpb	mmu-mir-146b	chr19: 46342762	chr19: 46338627-46338832(score=956)	Regulation	SRX265315	level 1	Liver	M.musculus
Cebpb	mmu-mir-146b	chr19: 46342762	chr19: 46338659-46338827(score=605)	Regulation	SRX950626	level 1	Liver	M.musculus
Cebpb	mmu-mir-146b	chr19: 46342762	chr19: 46338659-46338853(score=851)	Regulation	SRX661416	level 1	Liver	M.musculus
Cebpb	mmu-mir-146b	chr19: 46342762	chr19: 46338678-46338833(score=527)	Regulation	SRX950628	level 1	Liver	M.musculus
Cebpb	mmu-mir-146b	chr19: 46342762	chr19: 46339836-46340006(score=1000)	Regulation	SRX451626	level 1	Neural	M.musculus
Cebpb	mmu-mir-146b	chr19: 46342762	chr19: 46339838-46340008(score=696)	Regulation	SRX451627	level 1	Neural	M.musculus
Cebpb	mmu-mir-146b	chr19: 46342762	chr19: 46339850-46339989(score=602)	Regulation	SRX451625	level 1	Neural	M.musculus
Cebpb	mmu-mir-146b	chr19: 46342762	chr19: 46339778-46340062(score=1000)	Regulation	SRX1035401	level 1	Pluripotent stem cell	M.musculus
Cebpb	mmu-mir-223	chrX: 96239942	chrX: 96239644-96239928(score=1000)	Regulation	SRX1939437	level 2	Blood	M.musculus
Cebpb	mmu-mir-223	chrX: 96239942	chrX: 96239655-96239907(score=537)	Regulation	SRX2417360	level 2	Blood	M.musculus
Cebpb	mmu-mir-223	chrX: 96239942	chrX: 96239680-96239844(score=458)	Regulation	SRX122502	level 2	Blood	M.musculus
Cebpb	mmu-mir-223	chrX: 96239942	chrX: 96239685-96239843(score=604)	Regulation	SRX122501	level 2	Blood	M.musculus
Cebpb	mmu-mir-223	chrX: 96239942	chrX: 96239686-96239871(score=415)	Regulation	SRX2417362	level 2	Blood	M.musculus
Cebpb	mmu-mir-223	chrX: 96239942	chrX: 96239696-96239836(score=520)	Regulation	SRX392740	level 2	Blood	M.musculus
Cebpb	mmu-mir-223	chrX: 96239942	chrX: 96239725-96239858(score=417)	Regulation	SRX1686487	level 2	Blood	M.musculus
Cebpb	mmu-mir-223	chrX: 96239942	chrX: 96239726-96239812(score=403)	Regulation	SRX019137	level 2	Blood	M.musculus
Cebpb	mmu-mir-223	chrX: 96239926(NR_030718)	chrX: 96239584-96239953(score=1000)	Regulation	SRX742832	level 1	Blood	M.musculus
Cebpb	mmu-mir-223	chrX: 96239926(NR_030718)	chrX: 96239585-96239946(score=1000)	Regulation	SRX2901279	level 1	Blood	M.musculus
Cebpb	mmu-mir-223	chrX: 96239926(NR_030718)	chrX: 96239589-96239951(score=1000)	Regulation	SRX2417361	level 1	Blood	M.musculus
Cebpb	mmu-mir-223	chrX: 96239926(NR_030718)	chrX: 96239599-96239886(score=713)	Regulation	SRX2901278	level 1	Blood	M.musculus
Cebpb	mmu-mir-223	chrX: 96239926(NR_030718)	chrX: 96239603-96239928(score=1000)	Regulation	SRX2901276	level 1	Blood	M.musculus
Cebpb	mmu-mir-223	chrX: 96239926(NR_030718)	chrX: 96239613-96239928(score=774)	Regulation	SRX2901275	level 1	Blood	M.musculus
Cebpb	mmu-mir-223	chrX: 96239926(NR_030718)	chrX: 96239615-96239923(score=832)	Regulation	SRX2901277	level 1	Blood	M.musculus
Cebpb	mmu-mir-223	chrX: 96242817	chrX: 96239584-96239953(score=1000)	Regulation	SRX742832	level 1	Blood	M.musculus
Cebpb	mmu-mir-223	chrX: 96242817	chrX: 96239585-96239946(score=1000)	Regulation	SRX2901279	level 1	Blood	M.musculus
Cebpb	mmu-mir-223	chrX: 96242817	chrX: 96239589-96239951(score=1000)	Regulation	SRX2417361	level 1	Blood	M.musculus
Cebpb	mmu-mir-223	chrX: 96242817	chrX: 96239599-96239886(score=713)	Regulation	SRX2901278	level 1	Blood	M.musculus
Cebpb	mmu-mir-223	chrX: 96242817	chrX: 96239603-96239928(score=1000)	Regulation	SRX2901276	level 1	Blood	M.musculus
Cebpb	mmu-mir-223	chrX: 96242817	chrX: 96239613-96239928(score=774)	Regulation	SRX2901275	level 1	Blood	M.musculus
Cebpb	mmu-mir-223	chrX: 96242817	chrX: 96239615-96239923(score=832)	Regulation	SRX2901277	level 1	Blood	M.musculus
Cebpb	mmu-mir-223	chrX: 96239942	chrX: 96239694-96239866(score=900)	Regulation	SRX451626	level 2	Neural	M.musculus
Cebpb	mmu-mir-223	chrX: 96239926(NR_030718)	chrX: 96239633-96239892(score=809)	Regulation	SRX1035401	level 1	Pluripotent stem cell	M.musculus
Cebpb	mmu-mir-223	chrX: 96242817	chrX: 96239633-96239892(score=809)	Regulation	SRX1035401	level 1	Pluripotent stem cell	M.musculus
Cebpb	mmu-mir-223	n/a	n/a	Activation	25641499	literature	n/a	M.musculus
Cebpb	mmu-mir-15b	chr3: 69004738(NM_001356976)	chr3: 69004519-69004689(score=332)	Regulation	SRX2663109	level 1	Adipocyte	M.musculus
Cebpb	mmu-mir-15b	chr3: 69004738(NM_001356976)	chr3: 69004598-69004696(score=645)	Regulation	SRX341415	level 1	Adipocyte	M.musculus
Cebpb	mmu-mir-15b	chr3: 69004738(NM_001356976)	chr3: 69004608-69004682(score=513)	Regulation	SRX341417	level 1	Adipocyte	M.musculus
Cebpb	mmu-mir-15b	chr3: 69004738(NM_001356976)	chr3: 69004615-69004684(score=571)	Regulation	SRX341026	level 1	Adipocyte	M.musculus
Cebpb	mmu-mir-15b	chr3: 69004738(NM_133786)	chr3: 69004519-69004689(score=332)	Regulation	SRX2663109	level 1	Adipocyte	M.musculus
Cebpb	mmu-mir-15b	chr3: 69004738(NM_133786)	chr3: 69004598-69004696(score=645)	Regulation	SRX341415	level 1	Adipocyte	M.musculus
Cebpb	mmu-mir-15b	chr3: 69004738(NM_133786)	chr3: 69004608-69004682(score=513)	Regulation	SRX341417	level 1	Adipocyte	M.musculus
Cebpb	mmu-mir-15b	chr3: 69004738(NM_133786)	chr3: 69004615-69004684(score=571)	Regulation	SRX341026	level 1	Adipocyte	M.musculus
Cebpb	mmu-mir-15b	chr3: 69004738(NM_001356976)	chr3: 69004392-69004781(score=991)	Regulation	SRX742832	level 1	Blood	M.musculus
Cebpb	mmu-mir-15b	chr3: 69004738(NM_001356976)	chr3: 69004433-69004804(score=1000)	Regulation	SRX2901279	level 1	Blood	M.musculus
Cebpb	mmu-mir-15b	chr3: 69004738(NM_001356976)	chr3: 69004466-69004789(score=1000)	Regulation	SRX1939437	level 1	Blood	M.musculus
Cebpb	mmu-mir-15b	chr3: 69004738(NM_001356976)	chr3: 69004469-69004811(score=1000)	Regulation	SRX2417361	level 1	Blood	M.musculus
Cebpb	mmu-mir-15b	chr3: 69004738(NM_001356976)	chr3: 69004472-69004787(score=880)	Regulation	SRX2901278	level 1	Blood	M.musculus
Cebpb	mmu-mir-15b	chr3: 69004738(NM_001356976)	chr3: 69004505-69004778(score=661)	Regulation	SRX2901275	level 1	Blood	M.musculus
Cebpb	mmu-mir-15b	chr3: 69004738(NM_001356976)	chr3: 69004516-69004784(score=745)	Regulation	SRX2901277	level 1	Blood	M.musculus
Cebpb	mmu-mir-15b	chr3: 69004738(NM_001356976)	chr3: 69004521-69004779(score=689)	Regulation	SRX2901276	level 1	Blood	M.musculus
Cebpb	mmu-mir-15b	chr3: 69004738(NM_001356976)	chr3: 69004528-69004748(score=476)	Regulation	SRX2417360	level 1	Blood	M.musculus
Cebpb	mmu-mir-15b	chr3: 69004738(NM_001356976)	chr3: 69004550-69004723(score=749)	Regulation	SRX1686487	level 1	Blood	M.musculus
Cebpb	mmu-mir-15b	chr3: 69004738(NM_133786)	chr3: 69004392-69004781(score=991)	Regulation	SRX742832	level 1	Blood	M.musculus
Cebpb	mmu-mir-15b	chr3: 69004738(NM_133786)	chr3: 69004433-69004804(score=1000)	Regulation	SRX2901279	level 1	Blood	M.musculus
Cebpb	mmu-mir-15b	chr3: 69004738(NM_133786)	chr3: 69004466-69004789(score=1000)	Regulation	SRX1939437	level 1	Blood	M.musculus
Cebpb	mmu-mir-15b	chr3: 69004738(NM_133786)	chr3: 69004469-69004811(score=1000)	Regulation	SRX2417361	level 1	Blood	M.musculus
Cebpb	mmu-mir-15b	chr3: 69004738(NM_133786)	chr3: 69004472-69004787(score=880)	Regulation	SRX2901278	level 1	Blood	M.musculus
Cebpb	mmu-mir-15b	chr3: 69004738(NM_133786)	chr3: 69004505-69004778(score=661)	Regulation	SRX2901275	level 1	Blood	M.musculus
Cebpb	mmu-mir-15b	chr3: 69004738(NM_133786)	chr3: 69004516-69004784(score=745)	Regulation	SRX2901277	level 1	Blood	M.musculus
Cebpb	mmu-mir-15b	chr3: 69004738(NM_133786)	chr3: 69004521-69004779(score=689)	Regulation	SRX2901276	level 1	Blood	M.musculus
Cebpb	mmu-mir-15b	chr3: 69004738(NM_133786)	chr3: 69004528-69004748(score=476)	Regulation	SRX2417360	level 1	Blood	M.musculus
Cebpb	mmu-mir-15b	chr3: 69004738(NM_133786)	chr3: 69004550-69004723(score=749)	Regulation	SRX1686487	level 1	Blood	M.musculus
Cebpb	mmu-mir-15b	chr3: 69004738(NM_001356976)	chr3: 69004385-69004809(score=1000)	Regulation	SRX423964	level 1	Bone	M.musculus
Cebpb	mmu-mir-15b	chr3: 69004738(NM_001356976)	chr3: 69004395-69004807(score=1000)	Regulation	SRX201997	level 1	Bone	M.musculus
Cebpb	mmu-mir-15b	chr3: 69004738(NM_001356976)	chr3: 69004487-69004790(score=1000)	Regulation	SRX423953	level 1	Bone	M.musculus
Cebpb	mmu-mir-15b	chr3: 69004738(NM_001356976)	chr3: 69004491-69004789(score=1000)	Regulation	SRX201979	level 1	Bone	M.musculus
Cebpb	mmu-mir-15b	chr3: 69004738(NM_133786)	chr3: 69004385-69004809(score=1000)	Regulation	SRX423964	level 1	Bone	M.musculus
Cebpb	mmu-mir-15b	chr3: 69004738(NM_133786)	chr3: 69004395-69004807(score=1000)	Regulation	SRX201997	level 1	Bone	M.musculus
Cebpb	mmu-mir-15b	chr3: 69004738(NM_133786)	chr3: 69004487-69004790(score=1000)	Regulation	SRX423953	level 1	Bone	M.musculus
Cebpb	mmu-mir-15b	chr3: 69004738(NM_133786)	chr3: 69004491-69004789(score=1000)	Regulation	SRX201979	level 1	Bone	M.musculus
Cebpb	mmu-mir-15b	chr3: 69004996	chr3: 69004840-69004986(score=371)	Regulation	SRX661416	level 2	Liver	M.musculus
Cebpb	mmu-mir-15b	chr3: 69004738(NM_001356976)	chr3: 69004381-69004514(score=367)	Regulation	SRX265314	level 1	Liver	M.musculus
Cebpb	mmu-mir-15b	chr3: 69004738(NM_001356976)	chr3: 69004400-69004686(score=381)	Regulation	SRX265315	level 1	Liver	M.musculus
Cebpb	mmu-mir-15b	chr3: 69004738(NM_001356976)	chr3: 69004427-69004776(score=1000)	Regulation	SRX950626	level 1	Liver	M.musculus
Cebpb	mmu-mir-15b	chr3: 69004738(NM_001356976)	chr3: 69004433-69004753(score=1000)	Regulation	SRX661416	level 1	Liver	M.musculus
Cebpb	mmu-mir-15b	chr3: 69004738(NM_001356976)	chr3: 69004434-69004767(score=747)	Regulation	SRX204709	level 1	Liver	M.musculus
Cebpb	mmu-mir-15b	chr3: 69004738(NM_001356976)	chr3: 69004468-69004757(score=1000)	Regulation	SRX950628	level 1	Liver	M.musculus
Cebpb	mmu-mir-15b	chr3: 69004738(NM_001356976)	chr3: 69004485-69004733(score=1000)	Regulation	SRX204712	level 1	Liver	M.musculus
Cebpb	mmu-mir-15b	chr3: 69004738(NM_001356976)	chr3: 69004486-69004732(score=632)	Regulation	SRX204714	level 1	Liver	M.musculus
Cebpb	mmu-mir-15b	chr3: 69004738(NM_001356976)	chr3: 69004503-69004755(score=806)	Regulation	SRX204713	level 1	Liver	M.musculus
Cebpb	mmu-mir-15b	chr3: 69004738(NM_001356976)	chr3: 69004549-69004712(score=608)	Regulation	SRX265324	level 1	Liver	M.musculus
Cebpb	mmu-mir-15b	chr3: 69004738(NM_001356976)	chr3: 69004558-69004756(score=383)	Regulation	SRX257624	level 1	Liver	M.musculus
Cebpb	mmu-mir-15b	chr3: 69004738(NM_001356976)	chr3: 69004565-69004709(score=577)	Regulation	SRX265325	level 1	Liver	M.musculus
Cebpb	mmu-mir-15b	chr3: 69004738(NM_001356976)	chr3: 69004572-69004715(score=737)	Regulation	SRX265316	level 1	Liver	M.musculus
Cebpb	mmu-mir-15b	chr3: 69004738(NM_001356976)	chr3: 69004578-69004716(score=546)	Regulation	SRX265317	level 1	Liver	M.musculus
Cebpb	mmu-mir-15b	chr3: 69004738(NM_133786)	chr3: 69004381-69004514(score=367)	Regulation	SRX265314	level 1	Liver	M.musculus
Cebpb	mmu-mir-15b	chr3: 69004738(NM_133786)	chr3: 69004400-69004686(score=381)	Regulation	SRX265315	level 1	Liver	M.musculus
Cebpb	mmu-mir-15b	chr3: 69004738(NM_133786)	chr3: 69004427-69004776(score=1000)	Regulation	SRX950626	level 1	Liver	M.musculus
Cebpb	mmu-mir-15b	chr3: 69004738(NM_133786)	chr3: 69004433-69004753(score=1000)	Regulation	SRX661416	level 1	Liver	M.musculus
Cebpb	mmu-mir-15b	chr3: 69004738(NM_133786)	chr3: 69004434-69004767(score=747)	Regulation	SRX204709	level 1	Liver	M.musculus
Cebpb	mmu-mir-15b	chr3: 69004738(NM_133786)	chr3: 69004468-69004757(score=1000)	Regulation	SRX950628	level 1	Liver	M.musculus
Cebpb	mmu-mir-15b	chr3: 69004738(NM_133786)	chr3: 69004485-69004733(score=1000)	Regulation	SRX204712	level 1	Liver	M.musculus
Cebpb	mmu-mir-15b	chr3: 69004738(NM_133786)	chr3: 69004486-69004732(score=632)	Regulation	SRX204714	level 1	Liver	M.musculus
Cebpb	mmu-mir-15b	chr3: 69004738(NM_133786)	chr3: 69004503-69004755(score=806)	Regulation	SRX204713	level 1	Liver	M.musculus
Cebpb	mmu-mir-15b	chr3: 69004738(NM_133786)	chr3: 69004549-69004712(score=608)	Regulation	SRX265324	level 1	Liver	M.musculus
Cebpb	mmu-mir-15b	chr3: 69004738(NM_133786)	chr3: 69004558-69004756(score=383)	Regulation	SRX257624	level 1	Liver	M.musculus
Cebpb	mmu-mir-15b	chr3: 69004738(NM_133786)	chr3: 69004565-69004709(score=577)	Regulation	SRX265325	level 1	Liver	M.musculus
Cebpb	mmu-mir-15b	chr3: 69004738(NM_133786)	chr3: 69004572-69004715(score=737)	Regulation	SRX265316	level 1	Liver	M.musculus
Cebpb	mmu-mir-15b	chr3: 69004738(NM_133786)	chr3: 69004578-69004716(score=546)	Regulation	SRX265317	level 1	Liver	M.musculus
Cebpb	mmu-mir-15b	chr3: 69004738(NM_001356976)	chr3: 69004586-69004723(score=979)	Regulation	SRX142530	level 1	Muscle	M.musculus
Cebpb	mmu-mir-15b	chr3: 69004738(NM_133786)	chr3: 69004586-69004723(score=979)	Regulation	SRX142530	level 1	Muscle	M.musculus
Cebpb	mmu-mir-15b	chr3: 69004738(NM_001356976)	chr3: 69004593-69004695(score=466)	Regulation	SRX451626	level 1	Neural	M.musculus
Cebpb	mmu-mir-15b	chr3: 69004738(NM_133786)	chr3: 69004593-69004695(score=466)	Regulation	SRX451626	level 1	Neural	M.musculus
Cebpb	mmu-mir-15b	chr3: 69004738(NM_001356976)	chr3: 69004405-69004761(score=902)	Regulation	SRX1035401	level 1	Pluripotent stem cell	M.musculus
Cebpb	mmu-mir-15b	chr3: 69004738(NM_133786)	chr3: 69004405-69004761(score=902)	Regulation	SRX1035401	level 1	Pluripotent stem cell	M.musculus
Cebpb	mmu-mir-342	chr12: 108605766(NM_001163395)	chr12: 108600985-108601155(score=463)	Regulation	SRX201997	level 1	Bone	M.musculus
Cebpb	mmu-mir-214	chr1: 162217623(NR_002870)	chr1: 162215848-162215966(score=555)	Regulation	SRX341415	level 1	Adipocyte	M.musculus
Cebpb	mmu-mir-214	chr1: 162217623(NR_002870)	chr1: 162215858-162215952(score=638)	Regulation	SRX341417	level 1	Adipocyte	M.musculus
Cebpb	mmu-mir-214	chr1: 162217623(NR_002870)	chr1: 162216946-162217032(score=564)	Regulation	SRX341417	level 1	Adipocyte	M.musculus
Cebpb	mmu-mir-214	chr1: 162217623(NR_002870)	chr1: 162215783-162216073(score=684)	Regulation	SRX2901279	level 1	Blood	M.musculus
Cebpb	mmu-mir-214	chr1: 162217623(NR_002870)	chr1: 162215853-162216088(score=370)	Regulation	SRX2417361	level 1	Blood	M.musculus
Cebpb	mmu-mir-214	chr1: 162217623(NR_002870)	chr1: 162217404-162217699(score=617)	Regulation	SRX201997	level 1	Bone	M.musculus
Cebpb	mmu-mir-214	chr1: 162217623(NR_002870)	chr1: 162217448-162217664(score=411)	Regulation	SRX423964	level 1	Bone	M.musculus
Cebpb	mmu-mir-214	chr1: 162217623(NR_002870)	chr1: 162217496-162217661(score=345)	Regulation	SRX201979	level 1	Bone	M.musculus
Cebpb	mmu-mir-214	chr1: 162217623(NR_002870)	chr1: 162215807-162216065(score=651)	Regulation	SRX047642	level 1	Embryonic fibroblast	M.musculus
Cebpb	mmu-mir-214	chr1: 162217623(NR_002870)	chr1: 162215838-162215951(score=521)	Regulation	SRX451626	level 1	Neural	M.musculus
Cebpb	mmu-mir-214	chr1: 162217623(NR_002870)	chr1: 162215800-162216038(score=600)	Regulation	SRX1035401	level 1	Pluripotent stem cell	M.musculus
Cebpb	mmu-mir-25	chr5: 138171266(NM_001356576)	chr5: 138171009-138171274(score=1000)	Regulation(feedback)	SRX265315	level 1	Liver	M.musculus
Cebpb	mmu-mir-25	chr5: 138171266(NM_001356576)	chr5: 138171020-138171259(score=794)	Regulation(feedback)	SRX950626	level 1	Liver	M.musculus
Cebpb	mmu-mir-25	chr5: 138171266(NM_001356576)	chr5: 138171029-138171272(score=811)	Regulation(feedback)	SRX950628	level 1	Liver	M.musculus
Cebpb	mmu-mir-25	chr5: 138171266(NM_001356576)	chr5: 138171036-138171253(score=584)	Regulation(feedback)	SRX204710	level 1	Liver	M.musculus
Cebpb	mmu-mir-25	chr5: 138171266(NM_001356576)	chr5: 138171041-138171294(score=1000)	Regulation(feedback)	SRX661416	level 1	Liver	M.musculus
Cebpb	mmu-mir-25	chr5: 138171266(NM_001356576)	chr5: 138171056-138171241(score=421)	Regulation(feedback)	SRX204712	level 1	Liver	M.musculus
Cebpb	mmu-mir-25	chr5: 138171266(NM_001356576)	chr5: 138171077-138171213(score=386)	Regulation(feedback)	SRX204708	level 1	Liver	M.musculus
Cebpb	mmu-mir-25	chr5: 138171266(NM_001356577)	chr5: 138171009-138171274(score=1000)	Regulation(feedback)	SRX265315	level 1	Liver	M.musculus
Cebpb	mmu-mir-25	chr5: 138171266(NM_001356577)	chr5: 138171020-138171259(score=794)	Regulation(feedback)	SRX950626	level 1	Liver	M.musculus
Cebpb	mmu-mir-25	chr5: 138171266(NM_001356577)	chr5: 138171029-138171272(score=811)	Regulation(feedback)	SRX950628	level 1	Liver	M.musculus
Cebpb	mmu-mir-25	chr5: 138171266(NM_001356577)	chr5: 138171036-138171253(score=584)	Regulation(feedback)	SRX204710	level 1	Liver	M.musculus
Cebpb	mmu-mir-25	chr5: 138171266(NM_001356577)	chr5: 138171041-138171294(score=1000)	Regulation(feedback)	SRX661416	level 1	Liver	M.musculus
Cebpb	mmu-mir-25	chr5: 138171266(NM_001356577)	chr5: 138171056-138171241(score=421)	Regulation(feedback)	SRX204712	level 1	Liver	M.musculus
Cebpb	mmu-mir-25	chr5: 138171266(NM_001356577)	chr5: 138171077-138171213(score=386)	Regulation(feedback)	SRX204708	level 1	Liver	M.musculus
Cebpb	mmu-mir-25	chr5: 138171883(NM_008568)	chr5: 138171009-138171274(score=1000)	Regulation(feedback)	SRX265315	level 1	Liver	M.musculus
Cebpb	mmu-mir-25	chr5: 138171883(NM_008568)	chr5: 138171020-138171259(score=794)	Regulation(feedback)	SRX950626	level 1	Liver	M.musculus
Cebpb	mmu-mir-25	chr5: 138171883(NM_008568)	chr5: 138171029-138171272(score=811)	Regulation(feedback)	SRX950628	level 1	Liver	M.musculus
Cebpb	mmu-mir-25	chr5: 138171883(NM_008568)	chr5: 138171036-138171253(score=584)	Regulation(feedback)	SRX204710	level 1	Liver	M.musculus
Cebpb	mmu-mir-25	chr5: 138171883(NM_008568)	chr5: 138171041-138171294(score=1000)	Regulation(feedback)	SRX661416	level 1	Liver	M.musculus
Cebpb	mmu-mir-25	chr5: 138171883(NM_008568)	chr5: 138171056-138171241(score=421)	Regulation(feedback)	SRX204712	level 1	Liver	M.musculus
Cebpb	mmu-mir-25	chr5: 138171883(NM_008568)	chr5: 138171077-138171213(score=386)	Regulation(feedback)	SRX204708	level 1	Liver	M.musculus
Cebpb	mmu-mir-31	chr4: 88910662	chr4: 88909925-88910209(score=1000)	Regulation	SRX661416	level 1	Liver	M.musculus
Cebpb	mmu-mir-31	chr4: 88910662	chr4: 88909931-88910246(score=1000)	Regulation	SRX204711	level 1	Liver	M.musculus
Cebpb	mmu-mir-31	chr4: 88910662	chr4: 88909941-88910311(score=1000)	Regulation	SRX950628	level 1	Liver	M.musculus
Cebpb	mmu-mir-31	chr4: 88910662	chr4: 88909943-88910210(score=1000)	Regulation	SRX950626	level 1	Liver	M.musculus
Cebpb	mmu-mir-31	chr4: 88910662	chr4: 88909957-88910226(score=1000)	Regulation	SRX204710	level 1	Liver	M.musculus
Cebpb	mmu-mir-31	chr4: 88910662	chr4: 88909962-88910189(score=1000)	Regulation	SRX265316	level 1	Liver	M.musculus
Cebpb	mmu-mir-31	chr4: 88910662	chr4: 88909963-88910226(score=719)	Regulation	SRX204712	level 1	Liver	M.musculus
Cebpb	mmu-mir-31	chr4: 88910662	chr4: 88909964-88910221(score=1000)	Regulation	SRX265314	level 1	Liver	M.musculus
Cebpb	mmu-mir-31	chr4: 88910662	chr4: 88909965-88910336(score=1000)	Regulation	SRX204709	level 1	Liver	M.musculus
Cebpb	mmu-mir-31	chr4: 88910662	chr4: 88909968-88910183(score=1000)	Regulation	SRX265317	level 1	Liver	M.musculus
Cebpb	mmu-mir-31	chr4: 88910662	chr4: 88909968-88910219(score=763)	Regulation	SRX257624	level 1	Liver	M.musculus
Cebpb	mmu-mir-31	chr4: 88910662	chr4: 88909968-88910224(score=1000)	Regulation	SRX265315	level 1	Liver	M.musculus
Cebpb	mmu-mir-31	chr4: 88910662	chr4: 88909988-88910247(score=677)	Regulation	SRX204713	level 1	Liver	M.musculus
Cebpb	mmu-mir-31	chr4: 88910662	chr4: 88910004-88910197(score=984)	Regulation	SRX265324	level 1	Liver	M.musculus
Cebpb	mmu-mir-31	chr4: 88910662	chr4: 88910016-88910237(score=539)	Regulation	SRX204707	level 1	Liver	M.musculus
Cebpb	mmu-mir-31	chr4: 88910662	chr4: 88910025-88910192(score=957)	Regulation	SRX265325	level 1	Liver	M.musculus
Cebpb	mmu-mir-31	chr4: 88910662	chr4: 88910059-88910276(score=352)	Regulation	SRX204714	level 1	Liver	M.musculus
Cebpb	mmu-mir-181b	n/a	n/a	Activation	27430527	literature	n/a	M.musculus
Atf4	mmu-mir-146b	chr19: 46342762	chr19: 46339845-46339986(score=579)	Regulation	SRX122494	level 1	Blood	M.musculus
Egr2	mmu-mir-146b	chr19: 46341121	chr19: 46340851-46341198(score=1000)	Regulation	SRX270570	level 2	Blood	M.musculus
Egr2	mmu-mir-146b	chr19: 46341121	chr19: 46340859-46341189(score=758)	Regulation	SRX270569	level 2	Blood	M.musculus
Egr2	mmu-mir-15b	chr3: 69009772	chr3: 69005629-69006002(score=497)	Regulation	SRX270569	level 1	Blood	M.musculus
Egr2	mmu-mir-15b	chr3: 69009772	chr3: 69005693-69006064(score=484)	Regulation	SRX270570	level 1	Blood	M.musculus
Egr2	mmu-mir-25	chr5: 138171266(NM_001356576)	chr5: 138171864-138172207(score=837)	Regulation(feedback)	SRX270570	level 1	Blood	M.musculus
Egr2	mmu-mir-25	chr5: 138171266(NM_001356576)	chr5: 138171886-138172225(score=924)	Regulation(feedback)	SRX270569	level 1	Blood	M.musculus
Egr2	mmu-mir-25	chr5: 138171266(NM_001356576)	chr5: 138172322-138172568(score=401)	Regulation(feedback)	SRX270569	level 1	Blood	M.musculus
Egr2	mmu-mir-25	chr5: 138171266(NM_001356577)	chr5: 138171864-138172207(score=837)	Regulation(feedback)	SRX270570	level 1	Blood	M.musculus
Egr2	mmu-mir-25	chr5: 138171266(NM_001356577)	chr5: 138171886-138172225(score=924)	Regulation(feedback)	SRX270569	level 1	Blood	M.musculus
Egr2	mmu-mir-25	chr5: 138171266(NM_001356577)	chr5: 138172322-138172568(score=401)	Regulation(feedback)	SRX270569	level 1	Blood	M.musculus
Egr2	mmu-mir-25	chr5: 138171883(NM_008568)	chr5: 138171864-138172207(score=837)	Regulation(feedback)	SRX270570	level 1	Blood	M.musculus
Egr2	mmu-mir-25	chr5: 138171883(NM_008568)	chr5: 138171886-138172225(score=924)	Regulation(feedback)	SRX270569	level 1	Blood	M.musculus
Egr2	mmu-mir-25	chr5: 138171883(NM_008568)	chr5: 138172322-138172568(score=401)	Regulation(feedback)	SRX270569	level 1	Blood	M.musculus
Egr2	mmu-mir-132	chr11: 75173388	chr11: 75170151-75170730(score=1000)	Regulation(feedback)	SRX270569	level 1	Blood	M.musculus
Egr2	mmu-mir-132	chr11: 75173388	chr11: 75170181-75170733(score=1000)	Regulation(feedback)	SRX270570	level 1	Blood	M.musculus
Egr2	mmu-mir-132	chr11: 75173388	chr11: 75173408-75173898(score=1000)	Regulation(feedback)	SRX270570	level 1	Blood	M.musculus
Egr2	mmu-mir-132	chr11: 75173388	chr11: 75173515-75173956(score=1000)	Regulation(feedback)	SRX270569	level 1	Blood	M.musculus
Junb	mmu-mir-146a	chr11: 43374461	chr11: 43377172-43377572(score=1000)	Regulation	SRX2773920	level 1	Blood	M.musculus
Junb	mmu-mir-146a	chr11: 43374461	chr11: 43377206-43377503(score=785)	Regulation	SRX2773918	level 1	Blood	M.musculus
Junb	mmu-mir-146b	chr19: 46341121	chr19: 46340873-46341127(score=353)	Regulation	SRX2901293	level 2	Blood	M.musculus
Junb	mmu-mir-146b	chr19: 46342762	chr19: 46340842-46341235(score=548)	Regulation	SRX2901294	level 1	Blood	M.musculus
Junb	mmu-mir-223	chrX: 96239942	chrX: 96239651-96239881(score=505)	Regulation	SRX2901293	level 2	Blood	M.musculus
Junb	mmu-mir-223	chrX: 96239926(NR_030718)	chrX: 96239632-96239905(score=598)	Regulation	SRX2901294	level 1	Blood	M.musculus
Junb	mmu-mir-223	chrX: 96242817	chrX: 96239632-96239905(score=598)	Regulation	SRX2901294	level 1	Blood	M.musculus
Junb	mmu-mir-155	chr16: 84713023(NR_132106)	chr16: 84712978-84713490(score=1000)	Regulation	SRX197290	level 1	Blood	M.musculus
Junb	mmu-mir-155	chr16: 84713023(NR_132106)	chr16: 84713025-84713440(score=474)	Regulation	SRX2901294	level 1	Blood	M.musculus
Junb	mmu-mir-155	chr16: 84713023(NR_132106)	chr16: 84713051-84713476(score=1000)	Regulation	SRX2417358	level 1	Blood	M.musculus
Junb	mmu-mir-155	chr16: 84713023(NR_132106)	chr16: 84713070-84713384(score=537)	Regulation	SRX2901293	level 1	Blood	M.musculus
Junb	mmu-mir-155	chr16: 84713023(NR_132106)	chr16: 84713099-84713497(score=1000)	Regulation	SRX2773918	level 1	Blood	M.musculus
Junb	mmu-mir-155	chr16: 84713023(NR_132106)	chr16: 84713100-84713482(score=858)	Regulation	SRX2773920	level 1	Blood	M.musculus
Junb	mmu-mir-155	chr16: 84713023(NR_132106)	chr16: 84713142-84713409(score=599)	Regulation	SRX2417359	level 1	Blood	M.musculus
Junb	mmu-mir-155	chr16: 84714140	chr16: 84712978-84713490(score=1000)	Regulation	SRX197290	level 1	Blood	M.musculus
Junb	mmu-mir-155	chr16: 84714140	chr16: 84713025-84713440(score=474)	Regulation	SRX2901294	level 1	Blood	M.musculus
Junb	mmu-mir-155	chr16: 84714140	chr16: 84713051-84713476(score=1000)	Regulation	SRX2417358	level 1	Blood	M.musculus
Junb	mmu-mir-155	chr16: 84714140	chr16: 84713070-84713384(score=537)	Regulation	SRX2901293	level 1	Blood	M.musculus
Junb	mmu-mir-155	chr16: 84714140	chr16: 84713099-84713497(score=1000)	Regulation	SRX2773918	level 1	Blood	M.musculus
Junb	mmu-mir-155	chr16: 84714140	chr16: 84713100-84713482(score=858)	Regulation	SRX2773920	level 1	Blood	M.musculus
Junb	mmu-mir-155	chr16: 84714140	chr16: 84713142-84713409(score=599)	Regulation	SRX2417359	level 1	Blood	M.musculus
Junb	mmu-mir-214	chr1: 162217623(NR_002870)	chr1: 162215744-162216163(score=1000)	Regulation	SRX2901294	level 1	Blood	M.musculus
Junb	mmu-mir-214	chr1: 162217623(NR_002870)	chr1: 162215767-162216156(score=1000)	Regulation	SRX2901293	level 1	Blood	M.musculus
Junb	mmu-mir-214	chr1: 162217623(NR_002870)	chr1: 162215775-162216149(score=1000)	Regulation	SRX197290	level 1	Blood	M.musculus
Junb	mmu-mir-214	chr1: 162217623(NR_002870)	chr1: 162215828-162216092(score=602)	Regulation	SRX2773920	level 1	Blood	M.musculus
Junb	mmu-mir-214	chr1: 162217623(NR_002870)	chr1: 162215833-162216085(score=705)	Regulation	SRX2901292	level 1	Blood	M.musculus
Junb	mmu-mir-214	chr1: 162217623(NR_002870)	chr1: 162215834-162216052(score=483)	Regulation	SRX2773918	level 1	Blood	M.musculus
Junb	mmu-mir-214	chr1: 162217623(NR_002870)	chr1: 162215857-162216013(score=562)	Regulation	SRX172345	level 1	Blood	M.musculus
Junb	mmu-mir-132	chr11: 75173388	chr11: 75173200-75173547(score=1000)	Regulation	SRX197290	level 1	Blood	M.musculus
Snai1	mmu-mir-146b	chr19: 46342762	chr19: 46338541-46338663(score=436)	Regulation	SRX695880	level 1	Breast	M.musculus
Snai1	mmu-mir-15b	chr3: 69004738(NM_001356976)	chr3: 69004985-69005097(score=479)	Regulation	SRX695880	level 1	Breast	M.musculus
Snai1	mmu-mir-15b	chr3: 69004738(NM_133786)	chr3: 69004985-69005097(score=479)	Regulation	SRX695880	level 1	Breast	M.musculus
Snai1	mmu-mir-15b	chr3: 69009772	chr3: 69004985-69005097(score=479)	Regulation	SRX695880	level 1	Breast	M.musculus
Snai1	mmu-mir-342	chr12: 108554720(NM_001163394)	chr12: 108554677-108554794(score=582)	Regulation	SRX695880	level 1	Breast	M.musculus
Snai1	mmu-mir-342	chr12: 108554720(NM_007965)	chr12: 108554677-108554794(score=582)	Regulation	SRX695880	level 1	Breast	M.musculus
Snai1	mmu-mir-132	chr11: 75173388	chr11: 75173486-75173574(score=667)	Regulation	SRX150189	level 1	Muscle	M.musculus
Fos	mmu-mir-155	chr16: 84703333	chr16: 84703094-84703402(score=563)	Regulation(feedback)	SRX2901288	level 2	Blood	M.musculus
Fos	mmu-mir-155	chr16: 84703333	chr16: 84703114-84703402(score=621)	Regulation(feedback)	SRX2901289	level 2	Blood	M.musculus
Fos	mmu-mir-155	chr16: 84703333	chr16: 84703125-84703375(score=558)	Regulation(feedback)	SRX2901287	level 2	Blood	M.musculus
Fos	mmu-mir-214	chr1: 162217623(NR_002870)	chr1: 162215822-162216073(score=501)	Regulation	SRX2901289	level 1	Blood	M.musculus
Fos	mmu-mir-214	chr1: 162217623(NR_002870)	chr1: 162215847-162216065(score=470)	Regulation	SRX2901287	level 1	Blood	M.musculus
Fos	mmu-mir-214	chr1: 162217623(NR_002870)	chr1: 162215849-162216085(score=516)	Regulation	SRX2901288	level 1	Blood	M.musculus
Fos	mmu-mir-132	chr11: 75173388	chr11: 75170454-75170696(score=562)	Regulation	SRX2901288	level 1	Blood	M.musculus
Fos	mmu-mir-132	chr11: 75173388	chr11: 75170469-75170671(score=452)	Regulation	SRX2901287	level 1	Blood	M.musculus
Fos	mmu-mir-132	chr11: 75173388	chr11: 75170493-75170698(score=805)	Regulation	SRX310209	level 1	Blood	M.musculus
Fosl2	mmu-mir-155	chr16: 84703333	chr16: 84703195-84703369(score=647)	Regulation(feedback)	SRX187214	level 2	Blood	M.musculus
Fosl2	mmu-mir-155	chr16: 84703333	chr16: 84703196-84703400(score=1000)	Regulation(feedback)	SRX187215	level 2	Blood	M.musculus
Fosl2	mmu-mir-155	chr16: 84703333	chr16: 84703218-84703335(score=375)	Regulation(feedback)	SRX187213	level 2	Blood	M.musculus
Fosl2	mmu-mir-155	chr16: 84713023(NR_132106)	chr16: 84710440-84710580(score=550)	Regulation(feedback)	SRX187215	level 1	Blood	M.musculus
Fosl2	mmu-mir-155	chr16: 84713023(NR_132106)	chr16: 84713198-84713528(score=492)	Regulation(feedback)	SRX187215	level 1	Blood	M.musculus
Fosl2	mmu-mir-155	chr16: 84714140	chr16: 84710440-84710580(score=550)	Regulation(feedback)	SRX187215	level 1	Blood	M.musculus
Fosl2	mmu-mir-155	chr16: 84714140	chr16: 84713198-84713528(score=492)	Regulation(feedback)	SRX187215	level 1	Blood	M.musculus
Fosl2	mmu-mir-146a	chr11: 43374461	chr11: 43377227-43377530(score=541)	Regulation	SRX187215	level 1	Blood	M.musculus
Fosl2	mmu-mir-146a	chr11: 43374461	chr11: 43377235-43377510(score=442)	Regulation	SRX187214	level 1	Blood	M.musculus
Fosl2	mmu-mir-214	chr1: 162217623(NR_002870)	chr1: 162215836-162216059(score=1000)	Regulation	SRX187215	level 1	Blood	M.musculus
Fosl2	mmu-mir-214	chr1: 162217623(NR_002870)	chr1: 162215857-162216061(score=1000)	Regulation	SRX187214	level 1	Blood	M.musculus
Fosl2	mmu-mir-214	chr1: 162217623(NR_002870)	chr1: 162215858-162216043(score=761)	Regulation	SRX216285	level 1	Embryo	M.musculus
Fosl2	mmu-mir-132	chr11: 75173388	chr11: 75170496-75170693(score=1000)	Regulation	SRX187215	level 1	Blood	M.musculus
Fosl2	mmu-mir-132	chr11: 75173388	chr11: 75170515-75170689(score=619)	Regulation	SRX187214	level 1	Blood	M.musculus
Fosl2	mmu-mir-132	chr11: 75173388	chr11: 75170545-75170653(score=476)	Regulation	SRX187213	level 1	Blood	M.musculus
Fosl2	mmu-mir-132	chr11: 75173388	chr11: 75170498-75170676(score=607)	Regulation	SRX216285	level 1	Embryo	M.musculus
Fosl1	mmu-mir-214	chr1: 162217623(NR_002870)	chr1: 162212679-162212875(score=623)	Regulation	SRX2396482	level 1	Embryonic fibroblast	M.musculus
Fosl1	mmu-mir-214	chr1: 162217623(NR_002870)	chr1: 162212690-162212858(score=703)	Regulation	SRX2396481	level 1	Embryonic fibroblast	M.musculus
Fosl1	mmu-mir-214	chr1: 162217623(NR_002870)	chr1: 162215862-162216032(score=500)	Regulation	SRX2396480	level 1	Embryonic fibroblast	M.musculus
Fosl1	mmu-mir-25	chr5: 138165818	chr5: 138165210-138165346(score=509)	Regulation	SRX2396480	level 1	Embryonic fibroblast	M.musculus
Fosl1	mmu-mir-132	chr11: 75173388	chr11: 75170484-75170665(score=712)	Regulation	SRX2396480	level 1	Embryonic fibroblast	M.musculus
Mafk	mmu-mir-214	chr1: 162223368	chr1: 162222408-162222636(score=836)	Regulation	SRX140361	level 1	Blood	M.musculus
Mafk	mmu-mir-25	chr5: 138165818	chr5: 138165696-138165895(score=1000)	Regulation	SRX188829	level 1	Pluripotent stem cell	M.musculus
Sox4	mmu-mir-25	chr5: 138171266(NM_001356576)	chr5: 138170994-138171039(score=291)	Regulation	SRX337568	level 1	Blood	M.musculus
Sox4	mmu-mir-25	chr5: 138171266(NM_001356577)	chr5: 138170994-138171039(score=291)	Regulation	SRX337568	level 1	Blood	M.musculus
Sox4	mmu-mir-25	chr5: 138171883(NM_008568)	chr5: 138170994-138171039(score=291)	Regulation	SRX337568	level 1	Blood	M.musculus
Sox4	mmu-mir-25	chr5: 138171266(NM_001356576)	chr5: 138170972-138171116(score=434)	Regulation	SRX1149735	level 1	Pancreas	M.musculus
Sox4	mmu-mir-25	chr5: 138171266(NM_001356577)	chr5: 138170972-138171116(score=434)	Regulation	SRX1149735	level 1	Pancreas	M.musculus
Sox4	mmu-mir-25	chr5: 138171883(NM_008568)	chr5: 138170972-138171116(score=434)	Regulation	SRX1149735	level 1	Pancreas	M.musculus
Sox9	mmu-mir-25	chr5: 138171266(NM_001356576)	chr5: 138171035-138171268(score=485)	Regulation	SRX1035119	level 1	Embryo	M.musculus
Sox9	mmu-mir-25	chr5: 138171266(NM_001356577)	chr5: 138171035-138171268(score=485)	Regulation	SRX1035119	level 1	Embryo	M.musculus
Sox9	mmu-mir-25	chr5: 138171883(NM_008568)	chr5: 138171035-138171268(score=485)	Regulation	SRX1035119	level 1	Embryo	M.musculus
Egr1	mmu-mir-132	chr11: 75173388	chr11: 75173682-75173820(score=449)	Regulation	SRX204724	level 1	Liver	M.musculus

## Sheet: TF-miRNA
TFs	Relationship	Target miRNAS
Cebpb	upregulated	mmu-mir-21	mmu-mir-146b	mmu-mir-223	mmu-mir-155	mmu-mir-15b	mmu-mir-146a	mmu-mir-342	mmu-mir-214	mmu-mir-25	mmu-mir-31	mmu-mir-181b	mmu-mir-192	mmu-mir-455	mmu-mir-188-5p
Atf4	upregulated	mmu-mir-146b
Egr2	upregulated	mmu-mir-146b	mmu-mir-15b	mmu-mir-25	mmu-mir-132
Junb	upregulated	mmu-mir-146b	mmu-mir-223	mmu-mir-155	mmu-mir-146a	mmu-mir-214	mmu-mir-132
Snai1	upregulated	mmu-mir-146b	mmu-mir-15b	mmu-mir-342	mmu-mir-132
Fos	upregulated	mmu-mir-155	mmu-mir-214	mmu-mir-132
Fosl2	upregulated	mmu-mir-155	mmu-mir-146a	mmu-mir-214	mmu-mir-132
Fosl1	upregulated	mmu-mir-214	mmu-mir-25	mmu-mir-132
Mafk	upregulated	mmu-mir-214	mmu-mir-25
Sox4	upregulated	mmu-mir-25
Sox9	upregulated	mmu-mir-25	mmu-mir-455
Egr1	upregulated	mmu-mir-132
Nfil3	upregulated	mmu-mir-455
In TF predicted by miRNA, mir-805 has no transcription factor, and the other 20 miRNAs are regulated by transcription factors. After the intersection of transcription factors and differential genes, 13 differentially expressed transcription factors regulated 15 miRNAs. According to the results of TransmiR, theoretically, all transcription factors up regulate these miRNAs. However, it is found tha…
Yellow indicates the actual expression of down-regulated miRNAs, but these miRNAs are theoretically activated by TF, which is illogical and will not be analyzed in further study
Red indicates that these miRNAs are down regulated by TF, but the actual expression is up-regulated, so they are not in our concern.
The unmarked color is up-regulated miRNA, but some miRNAs are inhibited by TF, the expression should be down regulated, and the illogical miRNA is marked in red
Therefore, according to our results, all transcription factors targeting miRNA are up-regulated in diseases. We repeatedly observed the results of RRA. About 2/3 of the results of RRA were up-regulated genes.
In addition, the 3 transcription factors not only target miRNA, but also are regulated by the same miRNA.
Fosl2	mmu-mir-155	mmu-mir-146a
Cebpb	mmu-mir-155
Mafk	mmu-mir-25

## Sheet: Concerned miRNA
Concerned miRNA
mmu-mir-21
mmu-mir-146b
mmu-mir-155
mmu-mir-214
mmu-mir-25
mmu-mir-132
mmu-mir-15b
mmu-mir-223
mmu-mir-146a
mmu-mir-342-3p
mmu-mir-31
mmu-mir-181b
