# Supplementary material for: Identification of hub genes and transcription factor-miRNA-mRNA pathways in mice and human renal ischemia-reperfusion injury
Source: PeerJ. 2021 Oct 26;9:e12375. doi: 10.7717/peerj.12375 (PMC8555504; doi:10.7717/peerj.12375)
Supplement: Supplemental Information 7 — The sequence of miRNAs and the sequence of their target genes could be found in miRDB database. Here we provided their Target Score, which indicates the possibility of miRNA combine to 3′UTR of target genes. [file peerj-09-12375-s007.xlsx]

## Sheet: Eligible miRNA
Eligible miRNA
mmu-mir-146b
mmu-mir-155
mmu-mir-214
mmu-mir-25
mmu-mir-132
mmu-mir-15b
mmu-mir-223
mmu-mir-146a
mmu-mir-342-3p
mmu-mir-31
mmu-mir-181b

## Sheet: Target genes predicted by miRDB
Target Detail	Target Rank	Target Score	miRNA Name	Gene Symbol	Gene Description
Details	1	100	mmu-miR-21a-3p	Thap12	THAP domain containing 12
Details	2	99	mmu-miR-21a-3p	Cpeb2	cytoplasmic polyadenylation element binding protein 2
Details	3	99	mmu-miR-21a-3p	Ankib1	ankyrin repeat and IBR domain containing 1
Details	4	99	mmu-miR-21a-3p	Pik3ca	phosphatidylinositol-4,5-bisphosphate 3-kinase catalytic subunit alpha
Details	5	99	mmu-miR-21a-3p	Dtna	dystrobrevin alpha
Details	6	98	mmu-miR-21a-3p	Synj1	synaptojanin 1
Details	7	98	mmu-miR-21a-3p	Ero1lb	ERO1-like beta (S. cerevisiae)
Details	8	98	mmu-miR-21a-3p	Zfpm2	zinc finger protein, multitype 2
Details	9	98	mmu-miR-21a-3p	Pdgfrb	platelet derived growth factor receptor, beta polypeptide
Details	10	97	mmu-miR-21a-3p	Vapa	vesicle-associated membrane protein, associated protein A
Details	11	97	mmu-miR-21a-3p	Tra2a	transformer 2 alpha
Details	12	97	mmu-miR-21a-3p	Amfr	autocrine motility factor receptor
Details	13	97	mmu-miR-21a-3p	Tet1	tet methylcytosine dioxygenase 1
Details	14	97	mmu-miR-21a-3p	Naa50	N(alpha)-acetyltransferase 50, NatE catalytic subunit
Details	15	97	mmu-miR-21a-3p	Pcdh9	protocadherin 9
Details	16	97	mmu-miR-21a-3p	Cul2	cullin 2
Details	17	96	mmu-miR-21a-3p	Dact1	dishevelled-binding antagonist of beta-catenin 1
Details	18	96	mmu-miR-21a-3p	Hlf	hepatic leukemia factor
Details	19	96	mmu-miR-21a-3p	Sema3e	sema domain, immunoglobulin domain (Ig), short basic domain, secreted, (semaphorin) 3E
Details	20	96	mmu-miR-21a-3p	Nck1	non-catalytic region of tyrosine kinase adaptor protein 1
Details	21	96	mmu-miR-21a-3p	Hmg20a	high mobility group 20A
Details	22	96	mmu-miR-21a-3p	Traf5	TNF receptor-associated factor 5
Details	23	95	mmu-miR-21a-3p	Asap1	ArfGAP with SH3 domain, ankyrin repeat and PH domain1
Details	24	95	mmu-miR-21a-3p	Ssh2	slingshot protein phosphatase 2
Details	25	95	mmu-miR-21a-3p	Mynn	myoneurin
Details	26	95	mmu-miR-21a-3p	Epha5	Eph receptor A5
Details	27	95	mmu-miR-21a-3p	Gimap4	GTPase, IMAP family member 4
Details	28	95	mmu-miR-21a-3p	Paf1	Paf1, RNA polymerase II complex component
Details	29	95	mmu-miR-21a-3p	Rimklb	ribosomal modification protein rimK-like family member B
Details	30	95	mmu-miR-21a-3p	Epm2aip1	EPM2A (laforin) interacting protein 1
Details	31	95	mmu-miR-21a-3p	U2surp	U2 snRNP-associated SURP domain containing
Details	32	94	mmu-miR-21a-3p	Gcfc2	GC-rich sequence DNA binding factor 2
Details	33	94	mmu-miR-21a-3p	Pde1c	phosphodiesterase 1C
Details	34	94	mmu-miR-21a-3p	Dock5	dedicator of cytokinesis 5
Details	35	94	mmu-miR-21a-3p	Lysmd3	LysM, putative peptidoglycan-binding, domain containing 3
Details	36	94	mmu-miR-21a-3p	Srsf2	serine/arginine-rich splicing factor 2
Details	37	94	mmu-miR-21a-3p	Zfp207	zinc finger protein 207
Details	38	94	mmu-miR-21a-3p	Frs2	fibroblast growth factor receptor substrate 2
Details	39	93	mmu-miR-21a-3p	Sypl	synaptophysin-like protein
Details	40	93	mmu-miR-21a-3p	Pced1b	PC-esterase domain containing 1B
Details	41	93	mmu-miR-21a-3p	Spred1	sprouty protein with EVH-1 domain 1, related sequence
Details	42	93	mmu-miR-21a-3p	Dhx40	DEAH (Asp-Glu-Ala-His) box polypeptide 40
Details	43	93	mmu-miR-21a-3p	Rbm46	RNA binding motif protein 46
Details	44	93	mmu-miR-21a-3p	Usp34	ubiquitin specific peptidase 34
Details	45	93	mmu-miR-21a-3p	Rdx	radixin
Details	46	92	mmu-miR-21a-3p	Inpp1	inositol polyphosphate-1-phosphatase
Details	47	92	mmu-miR-21a-3p	Oaz1	ornithine decarboxylase antizyme 1
Details	48	92	mmu-miR-21a-3p	Srsf1	serine/arginine-rich splicing factor 1
Details	49	92	mmu-miR-21a-3p	Tbc1d8b	TBC1 domain family, member 8B
Details	50	92	mmu-miR-21a-3p	Ube2g2	ubiquitin-conjugating enzyme E2G 2
Details	51	92	mmu-miR-21a-3p	Lrba	LPS-responsive beige-like anchor
Details	52	92	mmu-miR-21a-3p	Tbx20	T-box 20
Details	53	92	mmu-miR-21a-3p	Bmi1	Bmi1 polycomb ring finger oncogene
Details	54	92	mmu-miR-21a-3p	Tfg	Trk-fused gene
Details	55	92	mmu-miR-21a-3p	Atxn1l	ataxin 1-like
Details	56	92	mmu-miR-21a-3p	Hic2	hypermethylated in cancer 2
Details	57	92	mmu-miR-21a-3p	Krit1	KRIT1, ankyrin repeat containing
Details	58	92	mmu-miR-21a-3p	D430041D05Rik	RIKEN cDNA D430041D05 gene
Details	59	92	mmu-miR-21a-3p	Sept11	septin 11
Details	60	92	mmu-miR-21a-3p	Cherp	calcium homeostasis endoplasmic reticulum protein
Details	61	91	mmu-miR-21a-3p	Rrp1b	ribosomal RNA processing 1 homolog B (S. cerevisiae)
Details	62	91	mmu-miR-21a-3p	Proser2	proline and serine rich 2
Details	63	91	mmu-miR-21a-3p	Map2k3	mitogen-activated protein kinase kinase 3
Details	64	91	mmu-miR-21a-3p	Zc3h7a	zinc finger CCCH type containing 7 A
Details	65	91	mmu-miR-21a-3p	Fnip2	folliculin interacting protein 2
Details	66	91	mmu-miR-21a-3p	Cd2ap	CD2-associated protein
Details	67	91	mmu-miR-21a-3p	Fam120a	family with sequence similarity 120, member A
Details	68	91	mmu-miR-21a-3p	Tardbp	TAR DNA binding protein
Details	69	91	mmu-miR-21a-3p	Atl3	atlastin GTPase 3
Details	70	90	mmu-miR-21a-3p	Ctnnb1	catenin (cadherin associated protein), beta 1
Details	71	90	mmu-miR-21a-3p	Kpnb1	karyopherin (importin) beta 1
Details	72	90	mmu-miR-21a-3p	Avl9	AVL9 cell migration associated
Details	73	90	mmu-miR-21a-3p	Top2a	topoisomerase (DNA) II alpha
Details	74	90	mmu-miR-21a-3p	Stx6	syntaxin 6
Details	75	90	mmu-miR-21a-3p	Tyro3	TYRO3 protein tyrosine kinase 3
Details	76	90	mmu-miR-21a-3p	Ubqln1	ubiquilin 1
Details	77	90	mmu-miR-21a-3p	Lats1	large tumor suppressor
Details	78	89	mmu-miR-21a-3p	Ptbp2	polypyrimidine tract binding protein 2
Details	79	89	mmu-miR-21a-3p	Aspn	asporin
Details	80	89	mmu-miR-21a-3p	Exph5	exophilin 5
Details	81	89	mmu-miR-21a-3p	Serpini1	serine (or cysteine) peptidase inhibitor, clade I, member 1
Details	82	89	mmu-miR-21a-3p	Neto1	neuropilin (NRP) and tolloid (TLL)-like 1
Details	83	89	mmu-miR-21a-3p	Mkrn3	makorin, ring finger protein, 3
Details	84	89	mmu-miR-21a-3p	Naa15	N(alpha)-acetyltransferase 15, NatA auxiliary subunit
Details	85	89	mmu-miR-21a-3p	Zscan4d	zinc finger and SCAN domain containing 4D
Details	86	89	mmu-miR-21a-3p	Oxr1	oxidation resistance 1
Details	87	89	mmu-miR-21a-3p	Vapb	vesicle-associated membrane protein, associated protein B and C
Details	88	89	mmu-miR-21a-3p	Nufip2	nuclear fragile X mental retardation protein interacting protein 2
Details	89	89	mmu-miR-21a-3p	Ptpn12	protein tyrosine phosphatase, non-receptor type 12
Details	90	89	mmu-miR-21a-3p	Cyp51	cytochrome P450, family 51
Details	91	89	mmu-miR-21a-3p	Setd2	SET domain containing 2
Details	92	89	mmu-miR-21a-3p	Osbpl6	oxysterol binding protein-like 6
Details	93	89	mmu-miR-21a-3p	Galnt1	polypeptide N-acetylgalactosaminyltransferase 1
Details	94	89	mmu-miR-21a-3p	Lamp2	lysosomal-associated membrane protein 2
Details	95	88	mmu-miR-21a-3p	4933427D14Rik	RIKEN cDNA 4933427D14 gene
Details	96	88	mmu-miR-21a-3p	Inpp4a	inositol polyphosphate-4-phosphatase, type I
Details	97	88	mmu-miR-21a-3p	Rab33b	RAB33B, member RAS oncogene family
Details	98	88	mmu-miR-21a-3p	Faxc	failed axon connections homolog
Details	99	88	mmu-miR-21a-3p	Cpne3	copine III
Details	100	88	mmu-miR-21a-3p	Gm14461	predicted gene 14461
Details	101	88	mmu-miR-21a-3p	Ppp1r3c	protein phosphatase 1, regulatory subunit 3C
Details	102	88	mmu-miR-21a-3p	Nppc	natriuretic peptide type C
Details	103	88	mmu-miR-21a-3p	Rab38	RAB38, member RAS oncogene family
Details	104	87	mmu-miR-21a-3p	Flrt2	fibronectin leucine rich transmembrane protein 2
Details	105	87	mmu-miR-21a-3p	Ppig	peptidyl-prolyl isomerase G (cyclophilin G)
Details	106	87	mmu-miR-21a-3p	Srsf6	serine/arginine-rich splicing factor 6
Details	107	87	mmu-miR-21a-3p	Chmp4b	charged multivesicular body protein 4B
Details	108	87	mmu-miR-21a-3p	Polq	polymerase (DNA directed), theta
Details	109	87	mmu-miR-21a-3p	Megf10	multiple EGF-like-domains 10
Details	110	87	mmu-miR-21a-3p	Smad2	SMAD family member 2
Details	111	87	mmu-miR-21a-3p	Slc4a5	solute carrier family 4, sodium bicarbonate cotransporter, member 5
Details	112	87	mmu-miR-21a-3p	Grhl3	grainyhead like transcription factor 3
Details	113	86	mmu-miR-21a-3p	Dpp10	dipeptidylpeptidase 10
Details	114	86	mmu-miR-21a-3p	Usp37	ubiquitin specific peptidase 37
Details	115	86	mmu-miR-21a-3p	Pld5	phospholipase D family, member 5
Details	116	86	mmu-miR-21a-3p	Nav1	neuron navigator 1
Details	117	86	mmu-miR-21a-3p	Elp1	elongator complex protein 1
Details	118	86	mmu-miR-21a-3p	Col22a1	collagen, type XXII, alpha 1
Details	119	86	mmu-miR-21a-3p	Usp9x	ubiquitin specific peptidase 9, X chromosome
Details	120	86	mmu-miR-21a-3p	2410131K14Rik	RIKEN cDNA 2410131K14 gene
Details	121	86	mmu-miR-21a-3p	Etv1	ets variant 1
Details	122	86	mmu-miR-21a-3p	Elovl3	elongation of very long chain fatty acids (FEN1/Elo2, SUR4/Elo3, yeast)-like 3
Details	123	86	mmu-miR-21a-3p	Cdk19	cyclin-dependent kinase 19
Details	124	86	mmu-miR-21a-3p	Zfp704	zinc finger protein 704
Details	125	86	mmu-miR-21a-3p	Zrsr1	zinc finger (CCCH type), RNA binding motif and serine/arginine rich 1
Details	126	86	mmu-miR-21a-3p	Fzd6	frizzled class receptor 6
Details	127	86	mmu-miR-21a-3p	Srgn	serglycin
Details	128	86	mmu-miR-21a-3p	Rnf38	ring finger protein 38
Details	129	86	mmu-miR-21a-3p	Pcbp2	poly(rC) binding protein 2
Details	130	86	mmu-miR-21a-3p	Hnf4g	hepatocyte nuclear factor 4, gamma
Details	131	85	mmu-miR-21a-3p	Cyp26b1	cytochrome P450, family 26, subfamily b, polypeptide 1
Details	132	85	mmu-miR-21a-3p	Gxylt1	glucoside xylosyltransferase 1
Details	133	85	mmu-miR-21a-3p	Prom1	prominin 1
Details	134	85	mmu-miR-21a-3p	Ppfia1	protein tyrosine phosphatase, receptor type, f polypeptide (PTPRF), interacting protein (liprin), alpha 1
Details	135	85	mmu-miR-21a-3p	Timm21	translocase of inner mitochondrial membrane 21
Details	136	85	mmu-miR-21a-3p	Dennd1b	DENN/MADD domain containing 1B
Details	137	85	mmu-miR-21a-3p	Etl4	enhancer trap locus 4
Details	138	85	mmu-miR-21a-3p	Col16a1	collagen, type XVI, alpha 1
Details	139	85	mmu-miR-21a-3p	Rap1b	RAS related protein 1b
Details	140	85	mmu-miR-21a-3p	Ifih1	interferon induced with helicase C domain 1
Details	141	85	mmu-miR-21a-3p	Lats2	large tumor suppressor 2
Details	142	85	mmu-miR-21a-3p	Wnt7a	wingless-type MMTV integration site family, member 7A
Details	143	85	mmu-miR-21a-3p	Klhl4	kelch-like 4
Details	144	85	mmu-miR-21a-3p	Nab1	Ngfi-A binding protein 1
Details	145	84	mmu-miR-21a-3p	Cdc14b	CDC14 cell division cycle 14B
Details	146	84	mmu-miR-21a-3p	Zscan4c	zinc finger and SCAN domain containing 4C
Details	147	84	mmu-miR-21a-3p	Rybp	RING1 and YY1 binding protein
Details	148	84	mmu-miR-21a-3p	Calm1	calmodulin 1
Details	149	84	mmu-miR-21a-3p	Pdzd4	PDZ domain containing 4
Details	150	84	mmu-miR-21a-3p	Atp6v1f	ATPase, H+ transporting, lysosomal V1 subunit F
Details	151	84	mmu-miR-21a-3p	Fam208b	family with sequence similarity 208, member B
Details	152	84	mmu-miR-21a-3p	Ing2	inhibitor of growth family, member 2
Details	153	84	mmu-miR-21a-3p	Otud4	OTU domain containing 4
Details	154	84	mmu-miR-21a-3p	Fbxl21	F-box and leucine-rich repeat protein 21
Details	155	84	mmu-miR-21a-3p	Nlgn1	neuroligin 1
Details	156	84	mmu-miR-21a-3p	Dicer1	dicer 1, ribonuclease type III
Details	157	84	mmu-miR-21a-3p	Tktl1	transketolase-like 1
Details	158	83	mmu-miR-21a-3p	Kif26b	kinesin family member 26B
Details	159	83	mmu-miR-21a-3p	Pcdh15	protocadherin 15
Details	160	83	mmu-miR-21a-3p	Mtss1l	metastasis suppressor 1-like
Details	161	83	mmu-miR-21a-3p	Coq8a	coenzyme Q8A
Details	162	83	mmu-miR-21a-3p	Mis12	MIS12 kinetochore complex component
Details	163	83	mmu-miR-21a-3p	Slc1a1	solute carrier family 1 (neuronal/epithelial high affinity glutamate transporter, system Xag), member 1
Details	164	83	mmu-miR-21a-3p	Arf3	ADP-ribosylation factor 3
Details	165	83	mmu-miR-21a-3p	Ryr3	ryanodine receptor 3
Details	166	83	mmu-miR-21a-3p	Amdhd1	amidohydrolase domain containing 1
Details	167	82	mmu-miR-21a-3p	Kif1b	kinesin family member 1B
Details	168	82	mmu-miR-21a-3p	Fgfr1	fibroblast growth factor receptor 1
Details	169	82	mmu-miR-21a-3p	Trim24	tripartite motif-containing 24
Details	170	82	mmu-miR-21a-3p	Tmem167	transmembrane protein 167
Details	171	82	mmu-miR-21a-3p	Mnt	max binding protein
Details	172	82	mmu-miR-21a-3p	Eef1b2	eukaryotic translation elongation factor 1 beta 2
Details	173	82	mmu-miR-21a-3p	Rps6ka6	ribosomal protein S6 kinase polypeptide 6
Details	174	82	mmu-miR-21a-3p	Cacnb2	calcium channel, voltage-dependent, beta 2 subunit
Details	175	82	mmu-miR-21a-3p	Ing3	inhibitor of growth family, member 3
Details	176	82	mmu-miR-21a-3p	Ap1b1	adaptor protein complex AP-1, beta 1 subunit
Details	177	82	mmu-miR-21a-3p	Abhd16a	abhydrolase domain containing 16A
Details	178	82	mmu-miR-21a-3p	Ube2e1	ubiquitin-conjugating enzyme E2E 1
Details	179	82	mmu-miR-21a-3p	Klhl13	kelch-like 13
Details	180	82	mmu-miR-21a-3p	Rab7	RAB7, member RAS oncogene family
Details	181	82	mmu-miR-21a-3p	Cript	cysteine-rich PDZ-binding protein
Details	182	82	mmu-miR-21a-3p	Marc2	mitochondrial amidoxime reducing component 2
Details	183	82	mmu-miR-21a-3p	Mcm2	minichromosome maintenance complex component 2
Details	184	81	mmu-miR-21a-3p	Rcc2	regulator of chromosome condensation 2
Details	185	81	mmu-miR-21a-3p	Itga9	integrin alpha 9
Details	186	81	mmu-miR-21a-3p	Tmem19	transmembrane protein 19
Details	187	81	mmu-miR-21a-3p	Crebrf	CREB3 regulatory factor
Details	188	81	mmu-miR-21a-3p	Pdxdc1	pyridoxal-dependent decarboxylase domain containing 1
Details	189	81	mmu-miR-21a-3p	Rora	RAR-related orphan receptor alpha
Details	190	81	mmu-miR-21a-3p	Entpd5	ectonucleoside triphosphate diphosphohydrolase 5
Details	191	81	mmu-miR-21a-3p	Vsig10l	V-set and immunoglobulin domain containing 10 like
Details	192	81	mmu-miR-21a-3p	Taok1	TAO kinase 1
Details	193	81	mmu-miR-21a-3p	Msi2	musashi RNA-binding protein 2
Details	194	81	mmu-miR-21a-3p	Socs2	suppressor of cytokine signaling 2
Details	195	81	mmu-miR-21a-3p	Lipo1	lipase, member O1
Details	196	81	mmu-miR-21a-3p	Adss	adenylosuccinate synthetase, non muscle
Details	197	81	mmu-miR-21a-3p	Gm8978	predicted gene 8978
Details	198	81	mmu-miR-21a-3p	Trpc5	transient receptor potential cation channel, subfamily C, member 5
Details	199	81	mmu-miR-21a-3p	Spata13	spermatogenesis associated 13
Details	200	80	mmu-miR-21a-3p	Cul5	cullin 5
Details	201	80	mmu-miR-21a-3p	Cacna2d1	calcium channel, voltage-dependent, alpha2/delta subunit 1
Details	202	80	mmu-miR-21a-3p	Rpp14	ribonuclease P 14 subunit
Details	203	80	mmu-miR-21a-3p	Abi2	abl-interactor 2
Details	204	80	mmu-miR-21a-3p	Efcab5	EF-hand calcium binding domain 5
Details	205	80	mmu-miR-21a-3p	Strbp	spermatid perinuclear RNA binding protein
Details	206	80	mmu-miR-21a-3p	Timp3	tissue inhibitor of metalloproteinase 3
Details	207	80	mmu-miR-21a-3p	Arhgef26	Rho guanine nucleotide exchange factor (GEF) 26
Details	208	80	mmu-miR-21a-3p	Fgl2	fibrinogen-like protein 2
Details	209	80	mmu-miR-21a-3p	Rgmb	repulsive guidance molecule family member B
Details	210	80	mmu-miR-21a-3p	Naa40	N(alpha)-acetyltransferase 40, NatD catalytic subunit
Details	211	80	mmu-miR-21a-3p	Grik2	glutamate receptor, ionotropic, kainate 2 (beta 2)
Details	212	80	mmu-miR-21a-3p	Mmp16	matrix metallopeptidase 16
Details	213	80	mmu-miR-21a-3p	Gpr37l1	G protein-coupled receptor 37-like 1
Details	214	80	mmu-miR-21a-3p	A830010M20Rik	RIKEN cDNA A830010M20 gene
Details	215	80	mmu-miR-21a-3p	Vbp1	von Hippel-Lindau binding protein 1
Details	216	80	mmu-miR-21a-3p	Smarcad1	SWI/SNF-related, matrix-associated actin-dependent regulator of chromatin, subfamily a, containing DEAD/H box 1
Details	217	80	mmu-miR-21a-3p	Calb1	calbindin 1
Details	218	80	mmu-miR-21a-3p	Bin1	bridging integrator 1
Details	219	80	mmu-miR-21a-3p	Mbnl3	muscleblind like splicing factor 3
Details	220	79	mmu-miR-21a-3p	Tle4	transducin-like enhancer of split 4
Details	221	79	mmu-miR-21a-3p	Pdhb	pyruvate dehydrogenase (lipoamide) beta
Details	222	79	mmu-miR-21a-3p	Slc25a51	solute carrier family 25, member 51
Details	223	79	mmu-miR-21a-3p	Xpot	exportin, tRNA (nuclear export receptor for tRNAs)
Details	224	79	mmu-miR-21a-3p	Zkscan1	zinc finger with KRAB and SCAN domains 1
Details	225	79	mmu-miR-21a-3p	Hook3	hook microtubule tethering protein 3
Details	226	79	mmu-miR-21a-3p	Dcun1d1	DCN1, defective in cullin neddylation 1, domain containing 1 (S. cerevisiae)
Details	227	79	mmu-miR-21a-3p	S100a16	S100 calcium binding protein A16
Details	228	79	mmu-miR-21a-3p	Sap130	Sin3A associated protein
Details	229	79	mmu-miR-21a-3p	H2-M3	histocompatibility 2, M region locus 3
Details	230	79	mmu-miR-21a-3p	Nr3c1	nuclear receptor subfamily 3, group C, member 1
Details	231	79	mmu-miR-21a-3p	Ahctf1	AT hook containing transcription factor 1
Details	232	79	mmu-miR-21a-3p	Fign	fidgetin
Details	233	79	mmu-miR-21a-3p	Sirpa	signal-regulatory protein alpha
Details	234	79	mmu-miR-21a-3p	Asxl2	additional sex combs like 2, transcriptional regulator
Details	235	78	mmu-miR-21a-3p	Il19	interleukin 19
Details	236	78	mmu-miR-21a-3p	Cyld	CYLD lysine 63 deubiquitinase
Details	237	78	mmu-miR-21a-3p	Dctn1	dynactin 1
Details	238	78	mmu-miR-21a-3p	Fam199x	family with sequence similarity 199, X-linked
Details	239	78	mmu-miR-21a-3p	Sema4d	sema domain, immunoglobulin domain (Ig), transmembrane domain (TM) and short cytoplasmic domain, (semaphorin) 4D
Details	240	78	mmu-miR-21a-3p	Kcnc2	potassium voltage gated channel, Shaw-related subfamily, member 2
Details	241	78	mmu-miR-21a-3p	Lbr	lamin B receptor
Details	242	78	mmu-miR-21a-3p	Cnksr2	connector enhancer of kinase suppressor of Ras 2
Details	243	78	mmu-miR-21a-3p	Rprd1b	regulation of nuclear pre-mRNA domain containing 1B
Details	244	78	mmu-miR-21a-3p	Snap91	synaptosomal-associated protein 91
Details	245	78	mmu-miR-21a-3p	Pcmtd1	protein-L-isoaspartate (D-aspartate) O-methyltransferase domain containing 1
Details	246	78	mmu-miR-21a-3p	Txndc12	thioredoxin domain containing 12 (endoplasmic reticulum)
Details	247	78	mmu-miR-21a-3p	Kif3a	kinesin family member 3A
Details	248	78	mmu-miR-21a-3p	Elavl2	ELAV like RNA binding protein 1
Details	249	78	mmu-miR-21a-3p	Wapl	WAPL cohesin release factor
Details	250	77	mmu-miR-21a-3p	Insig2	insulin induced gene 2
Details	251	77	mmu-miR-21a-3p	Vps26a	VPS26 retromer complex component A
Details	252	77	mmu-miR-21a-3p	Cntd1	cyclin N-terminal domain containing 1
Details	253	77	mmu-miR-21a-3p	Adamts5	a disintegrin-like and metallopeptidase (reprolysin type) with thrombospondin type 1 motif, 5 (aggrecanase-2)
Details	254	77	mmu-miR-21a-3p	Apc	APC, WNT signaling pathway regulator
Details	255	77	mmu-miR-21a-3p	Ipmk	inositol polyphosphate multikinase
Details	256	77	mmu-miR-21a-3p	Col3a1	collagen, type III, alpha 1
Details	257	77	mmu-miR-21a-3p	Wif1	Wnt inhibitory factor 1
Details	258	77	mmu-miR-21a-3p	Cd164	CD164 antigen
Details	259	77	mmu-miR-21a-3p	Wwtr1	WW domain containing transcription regulator 1
Details	260	77	mmu-miR-21a-3p	Slc5a3	solute carrier family 5 (inositol transporters), member 3
Details	261	77	mmu-miR-21a-3p	Smap1	small ArfGAP 1
Details	262	76	mmu-miR-21a-3p	Ehbp1	EH domain binding protein 1
Details	263	76	mmu-miR-21a-3p	Fam135a	family with sequence similarity 135, member A
Details	264	76	mmu-miR-21a-3p	Kdm6a	lysine (K)-specific demethylase 6A
Details	265	76	mmu-miR-21a-3p	Afg3l2	AFG3-like AAA ATPase 2
Details	266	76	mmu-miR-21a-3p	Tceal9	transcription elongation factor A like 9
Details	267	76	mmu-miR-21a-3p	Scaf11	SR-related CTD-associated factor 11
Details	268	76	mmu-miR-21a-3p	Naaladl2	N-acetylated alpha-linked acidic dipeptidase-like 2
Details	269	76	mmu-miR-21a-3p	Bcl11a	B cell CLL/lymphoma 11A (zinc finger protein)
Details	270	76	mmu-miR-21a-3p	Vgll3	vestigial like family member 3
Details	271	76	mmu-miR-21a-3p	Ppil4	peptidylprolyl isomerase (cyclophilin)-like 4
Details	272	76	mmu-miR-21a-3p	Scn9a	sodium channel, voltage-gated, type IX, alpha
Details	273	76	mmu-miR-21a-3p	Hoxc4	homeobox C4
Details	274	76	mmu-miR-21a-3p	Scn7a	sodium channel, voltage-gated, type VII, alpha
Details	275	76	mmu-miR-21a-3p	Mmp8	matrix metallopeptidase 8
Details	276	76	mmu-miR-21a-3p	Aff4	AF4/FMR2 family, member 4
Details	277	75	mmu-miR-21a-3p	Ttll7	tubulin tyrosine ligase-like family, member 7
Details	278	75	mmu-miR-21a-3p	Zfp868	zinc finger protein 868
Details	279	75	mmu-miR-21a-3p	Atad1	ATPase family, AAA domain containing 1
Details	280	75	mmu-miR-21a-3p	Dhrs9	dehydrogenase/reductase (SDR family) member 9
Details	281	75	mmu-miR-21a-3p	Cxadr	coxsackie virus and adenovirus receptor
Details	282	75	mmu-miR-21a-3p	Alox12	arachidonate 12-lipoxygenase
Details	283	75	mmu-miR-21a-3p	Cdk17	cyclin-dependent kinase 17
Details	284	75	mmu-miR-21a-3p	Ap1g1	adaptor protein complex AP-1, gamma 1 subunit
Details	285	75	mmu-miR-21a-3p	Slc18a2	solute carrier family 18 (vesicular monoamine), member 2
Details	286	75	mmu-miR-21a-3p	Pgr15l	G protein-coupled receptor 15-like
Details	287	75	mmu-miR-21a-3p	Mat2b	methionine adenosyltransferase II, beta
Details	288	74	mmu-miR-21a-3p	Mapre1	microtubule-associated protein, RP/EB family, member 1
Details	289	74	mmu-miR-21a-3p	Nanos1	nanos C2HC-type zinc finger 1
Details	290	74	mmu-miR-21a-3p	Sidt1	SID1 transmembrane family, member 1
Details	291	74	mmu-miR-21a-3p	A830018L16Rik	RIKEN cDNA A830018L16 gene
Details	292	74	mmu-miR-21a-3p	Hypk	huntingtin interacting protein K
Details	293	74	mmu-miR-21a-3p	Fgf13	fibroblast growth factor 13
Details	294	74	mmu-miR-21a-3p	Galnt4	polypeptide N-acetylgalactosaminyltransferase 4
Details	295	74	mmu-miR-21a-3p	Tmem60	transmembrane protein 60
Details	296	74	mmu-miR-21a-3p	Tra2b	transformer 2 beta
Details	297	74	mmu-miR-21a-3p	Hacd3	3-hydroxyacyl-CoA dehydratase 3
Details	298	74	mmu-miR-21a-3p	Fyn	Fyn proto-oncogene
Details	299	74	mmu-miR-21a-3p	Npat	nuclear protein in the AT region
Details	300	74	mmu-miR-21a-3p	Mindy2	MINDY lysine 48 deubiquitinase 2
Details	301	74	mmu-miR-21a-3p	Nxph1	neurexophilin 1
Details	302	74	mmu-miR-21a-3p	Snca	synuclein, alpha
Details	303	74	mmu-miR-21a-3p	Taf2	TATA-box binding protein associated factor 2
Details	304	74	mmu-miR-21a-3p	Ppp4r1	protein phosphatase 4, regulatory subunit 1
Details	305	73	mmu-miR-21a-3p	Tollip	toll interacting protein
Details	306	73	mmu-miR-21a-3p	AF366264	cDNA sequence AF366264
Details	307	73	mmu-miR-21a-3p	Neo1	neogenin
Details	308	73	mmu-miR-21a-3p	Sertad2	SERTA domain containing 2
Details	309	73	mmu-miR-21a-3p	Fkbp1a	FK506 binding protein 1a
Details	310	73	mmu-miR-21a-3p	Snap25	synaptosomal-associated protein 25
Details	311	73	mmu-miR-21a-3p	Rpp25	ribonuclease P/MRP 25 subunit
Details	312	73	mmu-miR-21a-3p	Myrf	myelin regulatory factor
Details	313	73	mmu-miR-21a-3p	Onecut2	one cut domain, family member 2
Details	314	73	mmu-miR-21a-3p	Etv5	ets variant 5
Details	315	73	mmu-miR-21a-3p	Chst15	carbohydrate sulfotransferase 15
Details	316	73	mmu-miR-21a-3p	Capn7	calpain 7
Details	317	73	mmu-miR-21a-3p	Tomm6	translocase of outer mitochondrial membrane 6
Details	318	73	mmu-miR-21a-3p	Sox6	SRY (sex determining region Y)-box 6
Details	319	73	mmu-miR-21a-3p	Cln5	ceroid-lipofuscinosis, neuronal 5
Details	320	73	mmu-miR-21a-3p	1810010H24Rik	RIKEN cDNA 1810010H24 gene
Details	321	73	mmu-miR-21a-3p	Sall2	spalt like transcription factor 2
Details	322	73	mmu-miR-21a-3p	Trmt6	tRNA methyltransferase 6
Details	323	73	mmu-miR-21a-3p	Afdn	afadin, adherens junction formation factor
Details	324	73	mmu-miR-21a-3p	Rp1	retinitis pigmentosa 1 (human)
Details	325	73	mmu-miR-21a-3p	Klhl26	kelch-like 26
Details	326	73	mmu-miR-21a-3p	Kcnb2	potassium voltage gated channel, Shab-related subfamily, member 2
Details	327	73	mmu-miR-21a-3p	Egfl8	EGF-like domain 8
Details	328	73	mmu-miR-21a-3p	Fam117b	family with sequence similarity 117, member B
Details	329	72	mmu-miR-21a-3p	Kif13a	kinesin family member 13A
Details	330	72	mmu-miR-21a-3p	Tpbg	trophoblast glycoprotein
Details	331	72	mmu-miR-21a-3p	Zfr	zinc finger RNA binding protein
Details	332	72	mmu-miR-21a-3p	1110012L19Rik	RIKEN cDNA 1110012L19 gene
Details	333	72	mmu-miR-21a-3p	Naip6	NLR family, apoptosis inhibitory protein 6
Details	334	72	mmu-miR-21a-3p	Zfp445	zinc finger protein 445
Details	335	72	mmu-miR-21a-3p	Epb41l2	erythrocyte membrane protein band 4.1 like 2
Details	336	72	mmu-miR-21a-3p	Rab11fip3	RAB11 family interacting protein 3 (class II)
Details	337	72	mmu-miR-21a-3p	Gja3	gap junction protein, alpha 3
Details	338	72	mmu-miR-21a-3p	Helz2	helicase with zinc finger 2, transcriptional coactivator
Details	339	72	mmu-miR-21a-3p	Vwa5a	von Willebrand factor A domain containing 5A
Details	340	72	mmu-miR-21a-3p	Pard3	par-3 family cell polarity regulator
Details	341	72	mmu-miR-21a-3p	Htt	huntingtin
Details	342	72	mmu-miR-21a-3p	Nup188	nucleoporin 188
Details	343	72	mmu-miR-21a-3p	Plaur	plasminogen activator, urokinase receptor
Details	344	72	mmu-miR-21a-3p	Elovl7	ELOVL family member 7, elongation of long chain fatty acids (yeast)
Details	345	72	mmu-miR-21a-3p	Lrrc39	leucine rich repeat containing 39
Details	346	71	mmu-miR-21a-3p	Cks1brt	CDC28 protein kinase 1b, retrogene
Details	347	71	mmu-miR-21a-3p	Hs3st2	heparan sulfate (glucosamine) 3-O-sulfotransferase 2
Details	348	71	mmu-miR-21a-3p	Pdap1	PDGFA associated protein 1
Details	349	71	mmu-miR-21a-3p	Tmem131	transmembrane protein 131
Details	350	71	mmu-miR-21a-3p	Tvp23b	trans-golgi network vesicle protein 23B
Details	351	71	mmu-miR-21a-3p	Rragb	Ras-related GTP binding B
Details	352	71	mmu-miR-21a-3p	Lhx9	LIM homeobox protein 9
Details	353	71	mmu-miR-21a-3p	Cltc	clathrin, heavy polypeptide (Hc)
Details	354	71	mmu-miR-21a-3p	Champ1	chromosome alignment maintaining phosphoprotein 1
Details	355	71	mmu-miR-21a-3p	Bend4	BEN domain containing 4
Details	356	71	mmu-miR-21a-3p	Ccnb1	cyclin B1
Details	357	71	mmu-miR-21a-3p	Atp6v1g1	ATPase, H+ transporting, lysosomal V1 subunit G1
Details	358	71	mmu-miR-21a-3p	Ctla4	cytotoxic T-lymphocyte-associated protein 4
Details	359	71	mmu-miR-21a-3p	Ccl4	chemokine (C-C motif) ligand 4
Details	360	71	mmu-miR-21a-3p	Spty2d1	SPT2, Suppressor of Ty, domain containing 1 (S. cerevisiae)
Details	361	71	mmu-miR-21a-3p	Zfp507	zinc finger protein 507
Details	362	70	mmu-miR-21a-3p	Rab11fip5	RAB11 family interacting protein 5 (class I)
Details	363	70	mmu-miR-21a-3p	Ccn3	cellular communication network factor 3
Details	364	70	mmu-miR-21a-3p	Cdk13	cyclin-dependent kinase 13
Details	365	70	mmu-miR-21a-3p	Ptpn2	protein tyrosine phosphatase, non-receptor type 2
Details	366	70	mmu-miR-21a-3p	Il6st	interleukin 6 signal transducer
Details	367	70	mmu-miR-21a-3p	Ahcyl2	S-adenosylhomocysteine hydrolase-like 2
Details	368	70	mmu-miR-21a-3p	Nexmif	neurite extension and migration factor
Details	369	70	mmu-miR-21a-3p	Mb21d2	Mab-21 domain containing 2
Details	370	70	mmu-miR-21a-3p	Iqsec1	IQ motif and Sec7 domain 1
Details	371	70	mmu-miR-21a-3p	Efhd1	EF hand domain containing 1
Details	372	70	mmu-miR-21a-3p	Stx17	syntaxin 17
Details	373	70	mmu-miR-21a-3p	Pex26	peroxisomal biogenesis factor 26
Details	374	70	mmu-miR-21a-3p	Zpbp	zona pellucida binding protein
Details	375	70	mmu-miR-21a-3p	Sorbs2	sorbin and SH3 domain containing 2
Details	376	70	mmu-miR-21a-3p	Acbd3	acyl-Coenzyme A binding domain containing 3
Details	377	70	mmu-miR-21a-3p	Plaa	phospholipase A2, activating protein
Details	378	70	mmu-miR-21a-3p	Gprc5b	G protein-coupled receptor, family C, group 5, member B
Details	379	70	mmu-miR-21a-3p	Car8	carbonic anhydrase 8
Details	380	70	mmu-miR-21a-3p	Nmt2	N-myristoyltransferase 2
Details	381	70	mmu-miR-21a-3p	Cdk20	cyclin-dependent kinase 20
Details	382	70	mmu-miR-21a-3p	Pter	phosphotriesterase related
Details	383	70	mmu-miR-21a-3p	Prpf4b	pre-mRNA processing factor 4B
Details	384	70	mmu-miR-21a-3p	Skap2	src family associated phosphoprotein 2
Details	385	69	mmu-miR-21a-3p	Slc39a10	solute carrier family 39 (zinc transporter), member 10
Details	386	69	mmu-miR-21a-3p	Dcun1d4	DCN1, defective in cullin neddylation 1, domain containing 4 (S. cerevisiae)
Details	387	69	mmu-miR-21a-3p	2010111I01Rik	RIKEN cDNA 2010111I01 gene
Details	388	69	mmu-miR-21a-3p	Scml4	Scm polycomb group protein like 4
Details	389	69	mmu-miR-21a-3p	Shprh	SNF2 histone linker PHD RING helicase
Details	390	69	mmu-miR-21a-3p	Hnrnpc	heterogeneous nuclear ribonucleoprotein C
Details	391	69	mmu-miR-21a-3p	Rmnd5a	required for meiotic nuclear division 5 homolog A
Details	392	69	mmu-miR-21a-3p	Rab3gap1	RAB3 GTPase activating protein subunit 1
Details	393	69	mmu-miR-21a-3p	9930104L06Rik	RIKEN cDNA 9930104L06 gene
Details	394	69	mmu-miR-21a-3p	Rasa2	RAS p21 protein activator 2
Details	395	69	mmu-miR-21a-3p	Luzp2	leucine zipper protein 2
Details	396	69	mmu-miR-21a-3p	Snx16	sorting nexin 16
Details	397	68	mmu-miR-21a-3p	Mid2	midline 2
Details	398	68	mmu-miR-21a-3p	Slc9a6	solute carrier family 9 (sodium/hydrogen exchanger), member 6
Details	399	68	mmu-miR-21a-3p	Mcrip1	MAPK regulated corepressor interacting protein 1
Details	400	68	mmu-miR-21a-3p	Fsbp	fibrinogen silencer binding protein
Details	401	68	mmu-miR-21a-3p	Kdm7a	lysine (K)-specific demethylase 7A
Details	402	68	mmu-miR-21a-3p	Hnrnpd	heterogeneous nuclear ribonucleoprotein D
Details	403	68	mmu-miR-21a-3p	Wnk3	WNK lysine deficient protein kinase 3
Details	404	68	mmu-miR-21a-3p	4930503L19Rik	RIKEN cDNA 4930503L19 gene
Details	405	68	mmu-miR-21a-3p	Gm12888	predicted gene 12888
Details	406	68	mmu-miR-21a-3p	Mrtfb	myocardin related transcription factor B
Details	407	68	mmu-miR-21a-3p	Psmc3ip	proteasome (prosome, macropain) 26S subunit, ATPase 3, interacting protein
Details	408	68	mmu-miR-21a-3p	Dlg3	discs large MAGUK scaffold protein 3
Details	409	68	mmu-miR-21a-3p	Pex3	peroxisomal biogenesis factor 3
Details	410	68	mmu-miR-21a-3p	D5Ertd579e	DNA segment, Chr 5, ERATO Doi 579, expressed
Details	411	68	mmu-miR-21a-3p	Slc5a8	solute carrier family 5 (iodide transporter), member 8
Details	412	68	mmu-miR-21a-3p	Cadm1	cell adhesion molecule 1
Details	413	68	mmu-miR-21a-3p	Dglucy	D-glutamate cyclase
Details	414	68	mmu-miR-21a-3p	Bdnf	brain derived neurotrophic factor
Details	415	68	mmu-miR-21a-3p	Rfx7	regulatory factor X, 7
Details	416	68	mmu-miR-21a-3p	Mllt10	myeloid/lymphoid or mixed-lineage leukemia; translocated to, 10
Details	417	68	mmu-miR-21a-3p	Nlrp4b	NLR family, pyrin domain containing 4B
Details	418	68	mmu-miR-21a-3p	Zbtb11	zinc finger and BTB domain containing 11
Details	419	68	mmu-miR-21a-3p	Setd5	SET domain containing 5
Details	420	68	mmu-miR-21a-3p	Prox1	prospero homeobox 1
Details	421	68	mmu-miR-21a-3p	Jak1	Janus kinase 1
Details	422	68	mmu-miR-21a-3p	Adcy1	adenylate cyclase 1
Details	423	68	mmu-miR-21a-3p	Phf3	PHD finger protein 3
Details	424	68	mmu-miR-21a-3p	Agmo	alkylglycerol monooxygenase
Details	425	68	mmu-miR-21a-3p	Prrc2b	proline-rich coiled-coil 2B
Details	426	68	mmu-miR-21a-3p	Clec2h	C-type lectin domain family 2, member h
Details	427	67	mmu-miR-21a-3p	Sla	src-like adaptor
Details	428	67	mmu-miR-21a-3p	Ybey	ybeY metallopeptidase
Details	429	67	mmu-miR-21a-3p	Nr4a3	nuclear receptor subfamily 4, group A, member 3
Details	430	67	mmu-miR-21a-3p	Rad54b	RAD54 homolog B (S. cerevisiae)
Details	431	67	mmu-miR-21a-3p	Il1rap	interleukin 1 receptor accessory protein
Details	432	67	mmu-miR-21a-3p	Gabra1	gamma-aminobutyric acid (GABA) A receptor, subunit alpha 1
Details	433	67	mmu-miR-21a-3p	Retreg3	reticulophagy regulator family member 3
Details	434	67	mmu-miR-21a-3p	Grk3	G protein-coupled receptor kinase 3
Details	435	67	mmu-miR-21a-3p	Ttc39b	tetratricopeptide repeat domain 39B
Details	436	67	mmu-miR-21a-3p	Mmaa	methylmalonic aciduria (cobalamin deficiency) type A
Details	437	67	mmu-miR-21a-3p	Mpzl1	myelin protein zero-like 1
Details	438	67	mmu-miR-21a-3p	Amigo1	adhesion molecule with Ig like domain 1
Details	439	66	mmu-miR-21a-3p	Zfp91	zinc finger protein 91
Details	440	66	mmu-miR-21a-3p	Kmt2c	lysine (K)-specific methyltransferase 2C
Details	441	66	mmu-miR-21a-3p	Dhtkd1	dehydrogenase E1 and transketolase domain containing 1
Details	442	66	mmu-miR-21a-3p	Pappa2	pappalysin 2
Details	443	66	mmu-miR-21a-3p	Urb1	URB1 ribosome biogenesis 1 homolog (S. cerevisiae)
Details	444	66	mmu-miR-21a-3p	Prpf38b	PRP38 pre-mRNA processing factor 38 (yeast) domain containing B
Details	445	66	mmu-miR-21a-3p	Cab39	calcium binding protein 39
Details	446	66	mmu-miR-21a-3p	Dennd6a	DENN/MADD domain containing 6A
Details	447	66	mmu-miR-21a-3p	Rnf152	ring finger protein 152
Details	448	66	mmu-miR-21a-3p	Six6	sine oculis-related homeobox 6
Details	449	66	mmu-miR-21a-3p	C1qbp	complement component 1, q subcomponent binding protein
Details	450	66	mmu-miR-21a-3p	Ubn2	ubinuclein 2
Details	451	66	mmu-miR-21a-3p	Tmem45a	transmembrane protein 45a
Details	452	66	mmu-miR-21a-3p	Prpf18	pre-mRNA processing factor 18
Details	453	66	mmu-miR-21a-3p	Dync2h1	dynein cytoplasmic 2 heavy chain 1
Details	454	66	mmu-miR-21a-3p	Enc1	ectodermal-neural cortex 1
Details	455	66	mmu-miR-21a-3p	Atg5	autophagy related 5
Details	456	66	mmu-miR-21a-3p	Cd200	CD200 antigen
Details	457	66	mmu-miR-21a-3p	Jarid2	jumonji, AT rich interactive domain 2
Details	458	65	mmu-miR-21a-3p	Ehf	ets homologous factor
Details	459	65	mmu-miR-21a-3p	Nhlrc2	NHL repeat containing 2
Details	460	65	mmu-miR-21a-3p	Atp6v1a	ATPase, H+ transporting, lysosomal V1 subunit A
Details	461	65	mmu-miR-21a-3p	Matr3	matrin 3
Details	462	65	mmu-miR-21a-3p	Zfp655	zinc finger protein 655
Details	463	65	mmu-miR-21a-3p	Fzd4	frizzled class receptor 4
Details	464	65	mmu-miR-21a-3p	Fyb	FYN binding protein
Details	465	65	mmu-miR-21a-3p	Zfp623	zinc finger protein 623
Details	466	65	mmu-miR-21a-3p	Cln6	ceroid-lipofuscinosis, neuronal 6
Details	467	65	mmu-miR-21a-3p	Vps35	VPS35 retromer complex component
Details	468	65	mmu-miR-21a-3p	Fam227b	family with sequence similarity 227, member B
Details	469	65	mmu-miR-21a-3p	Nono	non-POU-domain-containing, octamer binding protein
Details	470	65	mmu-miR-21a-3p	Pdcd11	programmed cell death 11
Details	471	65	mmu-miR-21a-3p	Sec31b	Sec31 homolog B (S. cerevisiae)
Details	472	64	mmu-miR-21a-3p	Nrn1	neuritin 1
Details	473	64	mmu-miR-21a-3p	Pofut1	protein O-fucosyltransferase 1
Details	474	64	mmu-miR-21a-3p	Zdhhc21	zinc finger, DHHC domain containing 21
Details	475	64	mmu-miR-21a-3p	Prdm2	PR domain containing 2, with ZNF domain
Details	476	64	mmu-miR-21a-3p	Gm11563	predicted gene 11563
Details	477	64	mmu-miR-21a-3p	Zcchc3	zinc finger, CCHC domain containing 3
Details	478	64	mmu-miR-21a-3p	Tmem43	transmembrane protein 43
Details	479	64	mmu-miR-21a-3p	Nisch	nischarin
Details	480	64	mmu-miR-21a-3p	1600012H06Rik	RIKEN cDNA 1600012H06 gene
Details	481	64	mmu-miR-21a-3p	Sema5a	sema domain, seven thrombospondin repeats (type 1 and type 1-like), transmembrane domain (TM) and short cytoplasmic domain, (semaphorin) 5A
Details	482	63	mmu-miR-21a-3p	Mblac2	metallo-beta-lactamase domain containing 2
Details	483	63	mmu-miR-21a-3p	Phip	pleckstrin homology domain interacting protein
Details	484	63	mmu-miR-21a-3p	Wipf1	WAS/WASL interacting protein family, member 1
Details	485	63	mmu-miR-21a-3p	Smurf2	SMAD specific E3 ubiquitin protein ligase 2
Details	486	63	mmu-miR-21a-3p	Unc13b	unc-13 homolog B
Details	487	63	mmu-miR-21a-3p	Tmem170b	transmembrane protein 170B
Details	488	63	mmu-miR-21a-3p	Tbx18	T-box18
Details	489	63	mmu-miR-21a-3p	Qsox2	quiescin Q6 sulfhydryl oxidase 2
Details	490	63	mmu-miR-21a-3p	Mon2	MON2 homolog, regulator of endosome to Golgi trafficking
Details	491	63	mmu-miR-21a-3p	Tmem33	transmembrane protein 33
Details	492	63	mmu-miR-21a-3p	Mtdh	metadherin
Details	493	63	mmu-miR-21a-3p	H3f3b	H3 histone, family 3B
Details	494	63	mmu-miR-21a-3p	Arhgef7	Rho guanine nucleotide exchange factor (GEF7)
Details	495	63	mmu-miR-21a-3p	Acvr2b	activin receptor IIB
Details	496	63	mmu-miR-21a-3p	Otx1	orthodenticle homeobox 1
Details	497	63	mmu-miR-21a-3p	Ska2	spindle and kinetochore associated complex subunit 2
Details	498	63	mmu-miR-21a-3p	Trps1	transcriptional repressor GATA binding 1
Details	499	63	mmu-miR-21a-3p	Marf1	meiosis regulator and mRNA stability 1
Details	500	63	mmu-miR-21a-3p	Ccna1	cyclin A1
Details	501	62	mmu-miR-21a-3p	Galnt11	polypeptide N-acetylgalactosaminyltransferase 11
Details	502	62	mmu-miR-21a-3p	Kcnk10	potassium channel, subfamily K, member 10
Details	503	62	mmu-miR-21a-3p	Birc6	baculoviral IAP repeat-containing 6
Details	504	62	mmu-miR-21a-3p	Lgr4	leucine-rich repeat-containing G protein-coupled receptor 4
Details	505	62	mmu-miR-21a-3p	Phf14	PHD finger protein 14
Details	506	62	mmu-miR-21a-3p	Atp2b1	ATPase, Ca++ transporting, plasma membrane 1
Details	507	62	mmu-miR-21a-3p	Scai	suppressor of cancer cell invasion
Details	508	62	mmu-miR-21a-3p	Cul3	cullin 3
Details	509	62	mmu-miR-21a-3p	Ncapd2	non-SMC condensin I complex, subunit D2
Details	510	62	mmu-miR-21a-3p	Flt1	FMS-like tyrosine kinase 1
Details	511	62	mmu-miR-21a-3p	Brsk2	BR serine/threonine kinase 2
Details	512	62	mmu-miR-21a-3p	Col24a1	collagen, type XXIV, alpha 1
Details	513	62	mmu-miR-21a-3p	9230112D13Rik	RIKEN cDNA 9230112D13 gene
Details	514	62	mmu-miR-21a-3p	Ap3s1	adaptor-related protein complex 3, sigma 1 subunit
Details	515	62	mmu-miR-21a-3p	Necap1	NECAP endocytosis associated 1
Details	516	62	mmu-miR-21a-3p	Zscan12	zinc finger and SCAN domain containing 12
Details	517	62	mmu-miR-21a-3p	Zfp609	zinc finger protein 609
Details	518	62	mmu-miR-21a-3p	Vps26b	VPS26 retromer complex component B
Details	519	62	mmu-miR-21a-3p	Arl14ep	ADP-ribosylation factor-like 14 effector protein
Details	520	61	mmu-miR-21a-3p	Amer1	APC membrane recruitment 1
Details	521	61	mmu-miR-21a-3p	Adam12	a disintegrin and metallopeptidase domain 12 (meltrin alpha)
Details	522	61	mmu-miR-21a-3p	Drd1	dopamine receptor D1
Details	523	61	mmu-miR-21a-3p	Ccdc50	coiled-coil domain containing 50
Details	524	61	mmu-miR-21a-3p	Trmt9b	tRNA methyltransferase 9B
Details	525	61	mmu-miR-21a-3p	Rab14	RAB14, member RAS oncogene family
Details	526	61	mmu-miR-21a-3p	Gja8	gap junction protein, alpha 8
Details	527	61	mmu-miR-21a-3p	Erbb4	erb-b2 receptor tyrosine kinase 4
Details	528	61	mmu-miR-21a-3p	Tial1	Tia1 cytotoxic granule-associated RNA binding protein-like 1
Details	529	61	mmu-miR-21a-3p	Zbtb34	zinc finger and BTB domain containing 34
Details	530	61	mmu-miR-21a-3p	Fitm2	fat storage-inducing transmembrane protein 2
Details	531	61	mmu-miR-21a-3p	Grm6	glutamate receptor, metabotropic 6
Details	532	61	mmu-miR-21a-3p	Hdhd2	haloacid dehalogenase-like hydrolase domain containing 2
Details	533	61	mmu-miR-21a-3p	Sec14l2	SEC14-like lipid binding 2
Details	534	61	mmu-miR-21a-3p	Hoxb7	homeobox B7
Details	535	61	mmu-miR-21a-3p	Adam22	a disintegrin and metallopeptidase domain 22
Details	536	61	mmu-miR-21a-3p	Dock4	dedicator of cytokinesis 4
Details	537	61	mmu-miR-21a-3p	Nkx2-1	NK2 homeobox 1
Details	538	61	mmu-miR-21a-3p	Megf11	multiple EGF-like-domains 11
Details	539	61	mmu-miR-21a-3p	Ppp3ca	protein phosphatase 3, catalytic subunit, alpha isoform
Details	540	61	mmu-miR-21a-3p	Palm2	paralemmin 2
Details	541	61	mmu-miR-21a-3p	Zfp352	zinc finger protein 352
Details	542	61	mmu-miR-21a-3p	Slain2	SLAIN motif family, member 2
Details	543	61	mmu-miR-21a-3p	Tbc1d31	TBC1 domain family, member 31
Details	544	61	mmu-miR-21a-3p	Kbtbd11	kelch repeat and BTB (POZ) domain containing 11
Details	545	61	mmu-miR-21a-3p	Lipc	lipase, hepatic
Details	546	61	mmu-miR-21a-3p	Wdr37	WD repeat domain 37
Details	547	61	mmu-miR-21a-3p	Nfatc3	nuclear factor of activated T cells, cytoplasmic, calcineurin dependent 3
Details	548	61	mmu-miR-21a-3p	Sec22c	SEC22 homolog C, vesicle trafficking protein
Details	549	61	mmu-miR-21a-3p	Epb41l5	erythrocyte membrane protein band 4.1 like 5
Details	550	61	mmu-miR-21a-3p	Arhgap35	Rho GTPase activating protein 35
Details	551	61	mmu-miR-21a-3p	Chd6	chromodomain helicase DNA binding protein 6
Details	552	61	mmu-miR-21a-3p	Zfp2	zinc finger protein 2
Details	553	60	mmu-miR-21a-3p	Bbs1	Bardet-Biedl syndrome 1 (human)
Details	554	60	mmu-miR-21a-3p	Adnp2	ADNP homeobox 2
Details	555	60	mmu-miR-21a-3p	Cyp2c40	cytochrome P450, family 2, subfamily c, polypeptide 40
Details	556	60	mmu-miR-21a-3p	Kmt2d	lysine (K)-specific methyltransferase 2D
Details	557	60	mmu-miR-21a-3p	Akt2	thymoma viral proto-oncogene 2
Details	558	60	mmu-miR-21a-3p	Il18r1	interleukin 18 receptor 1
Details	559	60	mmu-miR-21a-3p	Gimap8	GTPase, IMAP family member 8
Details	560	60	mmu-miR-21a-3p	Cyp2c67	cytochrome P450, family 2, subfamily c, polypeptide 67
Details	561	60	mmu-miR-21a-3p	Gdi1	guanosine diphosphate (GDP) dissociation inhibitor 1
Details	562	60	mmu-miR-21a-3p	Sgms2	sphingomyelin synthase 2
Details	563	60	mmu-miR-21a-3p	Tmem56	transmembrane protein 56
Details	564	60	mmu-miR-21a-3p	Cyp2c68	cytochrome P450, family 2, subfamily c, polypeptide 68
Details	565	60	mmu-miR-21a-3p	Ank3	ankyrin 3, epithelial
Details	566	60	mmu-miR-21a-3p	Cfi	complement component factor i
Details	567	60	mmu-miR-21a-3p	Npr3	natriuretic peptide receptor 3
Details	568	60	mmu-miR-21a-3p	Cyp2c69	cytochrome P450, family 2, subfamily c, polypeptide 69
Details	569	60	mmu-miR-21a-3p	Stk4	serine/threonine kinase 4
Details	570	60	mmu-miR-21a-3p	Fam69a	family with sequence similarity 69, member A
Details	571	59	mmu-miR-21a-3p	Dph3	diphthamine biosynthesis 3
Details	572	59	mmu-miR-21a-3p	Lrp6	low density lipoprotein receptor-related protein 6
Details	573	59	mmu-miR-21a-3p	Arl5b	ADP-ribosylation factor-like 5B
Details	574	59	mmu-miR-21a-3p	Smco3	single-pass membrane protein with coiled-coil domains 3
Details	575	59	mmu-miR-21a-3p	Mettl21a	methyltransferase like 21A
Details	576	59	mmu-miR-21a-3p	Ubxn7	UBX domain protein 7
Details	577	59	mmu-miR-21a-3p	Spata3	spermatogenesis associated 3
Details	578	59	mmu-miR-21a-3p	Zcchc2	zinc finger, CCHC domain containing 2
Details	579	59	mmu-miR-21a-3p	Edil3	EGF-like repeats and discoidin I-like domains 3
Details	580	59	mmu-miR-21a-3p	Snx4	sorting nexin 4
Details	581	59	mmu-miR-21a-3p	Atp6ap1	ATPase, H+ transporting, lysosomal accessory protein 1
Details	582	59	mmu-miR-21a-3p	Nr2c2	nuclear receptor subfamily 2, group C, member 2
Details	583	59	mmu-miR-21a-3p	Slc7a14	solute carrier family 7 (cationic amino acid transporter, y+ system), member 14
Details	584	59	mmu-miR-21a-3p	Fam49b	family with sequence similarity 49, member B
Details	585	59	mmu-miR-21a-3p	Rbm39	RNA binding motif protein 39
Details	586	59	mmu-miR-21a-3p	Dtx4	deltex 4, E3 ubiquitin ligase
Details	587	59	mmu-miR-21a-3p	Dio2	deiodinase, iodothyronine, type II
Details	588	59	mmu-miR-21a-3p	Rnf111	ring finger 111
Details	589	58	mmu-miR-21a-3p	Agap1	ArfGAP with GTPase domain, ankyrin repeat and PH domain 1
Details	590	58	mmu-miR-21a-3p	Pja2	praja ring finger ubiquitin ligase 2
Details	591	58	mmu-miR-21a-3p	Gpr165	G protein-coupled receptor 165
Details	592	58	mmu-miR-21a-3p	Scoc	short coiled-coil protein
Details	593	58	mmu-miR-21a-3p	Ccser1	coiled-coil serine rich 1
Details	594	58	mmu-miR-21a-3p	Dcun1d3	DCN1, defective in cullin neddylation 1, domain containing 3 (S. cerevisiae)
Details	595	58	mmu-miR-21a-3p	Gimap1	GTPase, IMAP family member 1
Details	596	58	mmu-miR-21a-3p	Lrrtm4	leucine rich repeat transmembrane neuronal 4
Details	597	58	mmu-miR-21a-3p	Trim33	tripartite motif-containing 33
Details	598	58	mmu-miR-21a-3p	Mtf2	metal response element binding transcription factor 2
Details	599	58	mmu-miR-21a-3p	Slc30a7	solute carrier family 30 (zinc transporter), member 7
Details	600	58	mmu-miR-21a-3p	Cdon	cell adhesion molecule-related/down-regulated by oncogenes
Details	601	58	mmu-miR-21a-3p	Lifr	LIF receptor alpha
Details	602	58	mmu-miR-21a-3p	Nxf1	nuclear RNA export factor 1
Details	603	58	mmu-miR-21a-3p	Siah1a	siah E3 ubiquitin protein ligase 1A
Details	604	58	mmu-miR-21a-3p	Cxcr3	chemokine (C-X-C motif) receptor 3
Details	605	58	mmu-miR-21a-3p	Hoxa5	homeobox A5
Details	606	58	mmu-miR-21a-3p	Ripk1	receptor (TNFRSF)-interacting serine-threonine kinase 1
Details	607	58	mmu-miR-21a-3p	Six4	sine oculis-related homeobox 4
Details	608	58	mmu-miR-21a-3p	Mysm1	myb-like, SWIRM and MPN domains 1
Details	609	58	mmu-miR-21a-3p	Cttnbp2nl	CTTNBP2 N-terminal like
Details	610	58	mmu-miR-21a-3p	Nudcd3	NudC domain containing 3
Details	611	58	mmu-miR-21a-3p	Mkx	mohawk homeobox
Details	612	58	mmu-miR-21a-3p	Sorcs1	sortilin-related VPS10 domain containing receptor 1
Details	613	58	mmu-miR-21a-3p	Foxo4	forkhead box O4
Details	614	58	mmu-miR-21a-3p	Socs7	suppressor of cytokine signaling 7
Details	615	58	mmu-miR-21a-3p	Ociad1	OCIA domain containing 1
Details	616	58	mmu-miR-21a-3p	Fbxl5	F-box and leucine-rich repeat protein 5
Details	617	57	mmu-miR-21a-3p	Ubfd1	ubiquitin family domain containing 1
Details	618	57	mmu-miR-21a-3p	Rbmx2	RNA binding motif protein, X-linked 2
Details	619	57	mmu-miR-21a-3p	Rab8a	RAB8A, member RAS oncogene family
Details	620	57	mmu-miR-21a-3p	Tctn1	tectonic family member 1
Details	621	57	mmu-miR-21a-3p	Trim68	tripartite motif-containing 68
Details	622	57	mmu-miR-21a-3p	Pcdh18	protocadherin 18
Details	623	57	mmu-miR-21a-3p	Rock1	Rho-associated coiled-coil containing protein kinase 1
Details	624	57	mmu-miR-21a-3p	Ube2i	ubiquitin-conjugating enzyme E2I
Details	625	57	mmu-miR-21a-3p	Ivns1abp	influenza virus NS1A binding protein
Details	626	57	mmu-miR-21a-3p	Stxbp5l	syntaxin binding protein 5-like
Details	627	57	mmu-miR-21a-3p	Rassf10	Ras association (RalGDS/AF-6) domain family (N-terminal) member 10
Details	628	57	mmu-miR-21a-3p	Hnrnpk	heterogeneous nuclear ribonucleoprotein K
Details	629	57	mmu-miR-21a-3p	2610008E11Rik	RIKEN cDNA 2610008E11 gene
Details	630	57	mmu-miR-21a-3p	Ccdc150	coiled-coil domain containing 150
Details	631	57	mmu-miR-21a-3p	Capza2	capping protein (actin filament) muscle Z-line, alpha 2
Details	632	57	mmu-miR-21a-3p	Mtmr9	myotubularin related protein 9
Details	633	57	mmu-miR-21a-3p	Polr3g	polymerase (RNA) III (DNA directed) polypeptide G
Details	634	57	mmu-miR-21a-3p	Dnajc1	DnaJ heat shock protein family (Hsp40) member C1
Details	635	57	mmu-miR-21a-3p	Zc3h6	zinc finger CCCH type containing 6
Details	636	57	mmu-miR-21a-3p	Zcchc14	zinc finger, CCHC domain containing 14
Details	637	57	mmu-miR-21a-3p	Zmym3	zinc finger, MYM-type 3
Details	638	57	mmu-miR-21a-3p	AW551984	expressed sequence AW551984
Details	639	56	mmu-miR-21a-3p	Ctdsp1	CTD (carboxy-terminal domain, RNA polymerase II, polypeptide A) small phosphatase 1
Details	640	56	mmu-miR-21a-3p	Isl1	ISL1 transcription factor, LIM/homeodomain
Details	641	56	mmu-miR-21a-3p	Usp49	ubiquitin specific peptidase 49
Details	642	56	mmu-miR-21a-3p	Slc39a14	solute carrier family 39 (zinc transporter), member 14
Details	643	56	mmu-miR-21a-3p	Rhoa	ras homolog family member A
Details	644	56	mmu-miR-21a-3p	Manea	mannosidase, endo-alpha
Details	645	56	mmu-miR-21a-3p	Cabyr	calcium-binding tyrosine-(Y)-phosphorylation regulated (fibrousheathin 2)
Details	646	56	mmu-miR-21a-3p	Cramp1l	cramped chromatin regulator homolog 1
Details	647	56	mmu-miR-21a-3p	Ppargc1a	peroxisome proliferative activated receptor, gamma, coactivator 1 alpha
Details	648	56	mmu-miR-21a-3p	Spint2	serine protease inhibitor, Kunitz type 2
Details	649	56	mmu-miR-21a-3p	Rhoh	ras homolog family member H
Details	650	56	mmu-miR-21a-3p	Syp	synaptophysin
Details	651	56	mmu-miR-21a-3p	Erich5	glutamate rich 5
Details	652	56	mmu-miR-21a-3p	Fgfr2	fibroblast growth factor receptor 2
Details	653	56	mmu-miR-21a-3p	Steap2	six transmembrane epithelial antigen of prostate 2
Details	654	56	mmu-miR-21a-3p	Cog3	component of oligomeric golgi complex 3
Details	655	56	mmu-miR-21a-3p	Adgrl2	adhesion G protein-coupled receptor L2
Details	656	56	mmu-miR-21a-3p	Nhsl2	NHS-like 2
Details	657	56	mmu-miR-21a-3p	Usp38	ubiquitin specific peptidase 38
Details	658	56	mmu-miR-21a-3p	Plin5	perilipin 5
Details	659	56	mmu-miR-21a-3p	Mthfd2	methylenetetrahydrofolate dehydrogenase (NAD+ dependent), methenyltetrahydrofolate cyclohydrolase
Details	660	56	mmu-miR-21a-3p	Neurod1	neurogenic differentiation 1
Details	661	56	mmu-miR-21a-3p	Ddc	dopa decarboxylase
Details	662	56	mmu-miR-21a-3p	Mdh1	malate dehydrogenase 1, NAD (soluble)
Details	663	56	mmu-miR-21a-3p	Atrx	ATRX, chromatin remodeler
Details	664	56	mmu-miR-21a-3p	1700025G04Rik	RIKEN cDNA 1700025G04 gene
Details	665	56	mmu-miR-21a-3p	Zbtb1	zinc finger and BTB domain containing 1
Details	666	56	mmu-miR-21a-3p	Ccdc18	coiled-coil domain containing 18
Details	667	56	mmu-miR-21a-3p	Zzef1	zinc finger, ZZ-type with EF hand domain 1
Details	668	56	mmu-miR-21a-3p	Adamts17	a disintegrin-like and metallopeptidase (reprolysin type) with thrombospondin type 1 motif, 17
Details	669	56	mmu-miR-21a-3p	Knop1	lysine rich nucleolar protein 1
Details	670	56	mmu-miR-21a-3p	C2cd4c	C2 calcium-dependent domain containing 4C
Details	671	55	mmu-miR-21a-3p	Adra2b	adrenergic receptor, alpha 2b
Details	672	55	mmu-miR-21a-3p	Gfpt1	glutamine fructose-6-phosphate transaminase 1
Details	673	55	mmu-miR-21a-3p	Gm10220	predicted gene 10220
Details	674	55	mmu-miR-21a-3p	Taf8	TATA-box binding protein associated factor 8
Details	675	55	mmu-miR-21a-3p	Lpar3	lysophosphatidic acid receptor 3
Details	676	55	mmu-miR-21a-3p	Nsf	N-ethylmaleimide sensitive fusion protein
Details	677	55	mmu-miR-21a-3p	Eif5b	eukaryotic translation initiation factor 5B
Details	678	55	mmu-miR-21a-3p	Evx1	even-skipped homeobox 1
Details	679	55	mmu-miR-21a-3p	Glce	glucuronyl C5-epimerase
Details	680	55	mmu-miR-21a-3p	Naa30	N(alpha)-acetyltransferase 30, NatC catalytic subunit
Details	681	55	mmu-miR-21a-3p	Crem	cAMP responsive element modulator
Details	682	55	mmu-miR-21a-3p	Appl1	adaptor protein, phosphotyrosine interaction, PH domain and leucine zipper containing 1
Details	683	55	mmu-miR-21a-3p	Slc8a1	solute carrier family 8 (sodium/calcium exchanger), member 1
Details	684	55	mmu-miR-21a-3p	Seh1l	SEH1-like (S. cerevisiae
Details	685	55	mmu-miR-21a-3p	Sfmbt1	Scm-like with four mbt domains 1
Details	686	55	mmu-miR-21a-3p	Fbxo32	F-box protein 32
Details	687	55	mmu-miR-21a-3p	Rpe65	retinal pigment epithelium 65
Details	688	55	mmu-miR-21a-3p	Rhpn2	rhophilin, Rho GTPase binding protein 2
Details	689	55	mmu-miR-21a-3p	Foxd4	forkhead box D4
Details	690	55	mmu-miR-21a-3p	Dcp2	decapping mRNA 2
Details	691	55	mmu-miR-21a-3p	Arpc5	actin related protein 2/3 complex, subunit 5
Details	692	55	mmu-miR-21a-3p	Cldn22	claudin 22
Details	693	55	mmu-miR-21a-3p	Gda	guanine deaminase
Details	694	55	mmu-miR-21a-3p	Atf3	activating transcription factor 3
Details	695	55	mmu-miR-21a-3p	Os9	amplified in osteosarcoma
Details	696	55	mmu-miR-21a-3p	Sart1	squamous cell carcinoma antigen recognized by T cells 1
Details	697	55	mmu-miR-21a-3p	Arhgap10	Rho GTPase activating protein 10
Details	698	55	mmu-miR-21a-3p	Adarb1	adenosine deaminase, RNA-specific, B1
Details	699	55	mmu-miR-21a-3p	Adgrl4	adhesion G protein-coupled receptor L4
Details	700	54	mmu-miR-21a-3p	Tbck	TBC1 domain containing kinase
Details	701	54	mmu-miR-21a-3p	Pla2g4d	phospholipase A2, group IVD
Details	702	54	mmu-miR-21a-3p	Styx	serine/threonine/tyrosine interaction protein
Details	703	54	mmu-miR-21a-3p	Sumo2	small ubiquitin-like modifier 2
Details	704	54	mmu-miR-21a-3p	Ints11	integrator complex subunit 11
Details	705	54	mmu-miR-21a-3p	Clcn6	chloride channel, voltage-sensitive 6
Details	706	54	mmu-miR-21a-3p	Mreg	melanoregulin
Details	707	54	mmu-miR-21a-3p	Rab10	RAB10, member RAS oncogene family
Details	708	54	mmu-miR-21a-3p	Csnk2a2	casein kinase 2, alpha prime polypeptide
Details	709	54	mmu-miR-21a-3p	1810030O07Rik	RIKEN cDNA 1810030O07 gene
Details	710	54	mmu-miR-21a-3p	Pcf11	PCF11 cleavage and polyadenylation factor subunit
Details	711	54	mmu-miR-21a-3p	Greb1	gene regulated by estrogen in breast cancer protein
Details	712	54	mmu-miR-21a-3p	Ccm2l	cerebral cavernous malformation 2-like
Details	713	54	mmu-miR-21a-3p	Cxxc5	CXXC finger 5
Details	714	54	mmu-miR-21a-3p	Hecw2	HECT, C2 and WW domain containing E3 ubiquitin protein ligase 2
Details	715	54	mmu-miR-21a-3p	Prickle2	prickle planar cell polarity protein 2
Details	716	54	mmu-miR-21a-3p	Nsun2	NOL1/NOP2/Sun domain family member 2
Details	717	54	mmu-miR-21a-3p	Lbp	lipopolysaccharide binding protein
Details	718	54	mmu-miR-21a-3p	Cxcl15	chemokine (C-X-C motif) ligand 15
Details	719	54	mmu-miR-21a-3p	Zfp467	zinc finger protein 467
Details	720	54	mmu-miR-21a-3p	Hoxa10	homeobox A10
Details	721	54	mmu-miR-21a-3p	Fads1	fatty acid desaturase 1
Details	722	54	mmu-miR-21a-3p	Tmem64	transmembrane protein 64
Details	723	54	mmu-miR-21a-3p	Rad54l2	RAD54 like 2 (S. cerevisiae)
Details	724	54	mmu-miR-21a-3p	Zdhhc17	zinc finger, DHHC domain containing 17
Details	725	54	mmu-miR-21a-3p	Psmf1	proteasome (prosome, macropain) inhibitor subunit 1
Details	726	54	mmu-miR-21a-3p	Gem	GTP binding protein (gene overexpressed in skeletal muscle)
Details	727	54	mmu-miR-21a-3p	Chic1	cysteine-rich hydrophobic domain 1
Details	728	54	mmu-miR-21a-3p	Lrcol1	leucine rich colipase-like 1
Details	729	54	mmu-miR-21a-3p	Pigc	phosphatidylinositol glycan anchor biosynthesis, class C
Details	730	53	mmu-miR-21a-3p	Usp15	ubiquitin specific peptidase 15
Details	731	53	mmu-miR-21a-3p	Tppp	tubulin polymerization promoting protein
Details	732	53	mmu-miR-21a-3p	Hnrnpll	heterogeneous nuclear ribonucleoprotein L-like
Details	733	53	mmu-miR-21a-3p	Wfdc11	WAP four-disulfide core domain 11
Details	735	53	mmu-miR-21a-3p	Negr1	neuronal growth regulator 1
Details	736	53	mmu-miR-21a-3p	Phc3	polyhomeotic 3
Details	737	53	mmu-miR-21a-3p	Pdrg1	p53 and DNA damage regulated 1
Details	738	53	mmu-miR-21a-3p	Col7a1	collagen, type VII, alpha 1
Details	739	53	mmu-miR-21a-3p	Ptpn3	protein tyrosine phosphatase, non-receptor type 3
Details	740	53	mmu-miR-21a-3p	Ywhaq	tyrosine 3-monooxygenase/tryptophan 5-monooxygenase activation protein theta
Details	741	53	mmu-miR-21a-3p	Hapln1	hyaluronan and proteoglycan link protein 1
Details	742	53	mmu-miR-21a-3p	Slc17a6	solute carrier family 17 (sodium-dependent inorganic phosphate cotransporter), member 6
Details	743	53	mmu-miR-21a-3p	Scin	scinderin
Details	744	53	mmu-miR-21a-3p	Rad1	RAD1 checkpoint DNA exonuclease
Details	745	53	mmu-miR-21a-3p	Erv3	endogenous retroviral sequence 3
Details	746	53	mmu-miR-21a-3p	Slc30a4	solute carrier family 30 (zinc transporter), member 4
Details	747	53	mmu-miR-21a-3p	Wdr77	WD repeat domain 77
Details	748	53	mmu-miR-21a-3p	Jcad	junctional cadherin 5 associated
Details	749	53	mmu-miR-21a-3p	Kidins220	kinase D-interacting substrate 220
Details	750	53	mmu-miR-21a-3p	Adam17	a disintegrin and metallopeptidase domain 17
Details	751	53	mmu-miR-21a-3p	Lin28b	lin-28 homolog B (C. elegans)
Details	752	52	mmu-miR-21a-3p	Zbed6	zinc finger, BED type containing 6
Details	753	52	mmu-miR-21a-3p	Slc7a3	solute carrier family 7 (cationic amino acid transporter, y+ system), member 3
Details	754	52	mmu-miR-21a-3p	Pdgfra	platelet derived growth factor receptor, alpha polypeptide
Details	755	52	mmu-miR-21a-3p	Ppp2ca	protein phosphatase 2 (formerly 2A), catalytic subunit, alpha isoform
Details	756	52	mmu-miR-21a-3p	BC147527	cDNA sequence BC147527
Details	757	52	mmu-miR-21a-3p	Pcdha10	protocadherin alpha 10
Details	758	52	mmu-miR-21a-3p	Krt222	keratin 222
Details	759	52	mmu-miR-21a-3p	Hbp1	high mobility group box transcription factor 1
Details	760	52	mmu-miR-21a-3p	Mesd	mesoderm development LRP chaperone
Details	761	52	mmu-miR-21a-3p	Arl4a	ADP-ribosylation factor-like 4A
Details	762	52	mmu-miR-21a-3p	Clic6	chloride intracellular channel 6
Details	763	52	mmu-miR-21a-3p	Arvcf	armadillo repeat gene deleted in velocardiofacial syndrome
Details	764	52	mmu-miR-21a-3p	Pcdha11	protocadherin alpha 11
Details	765	52	mmu-miR-21a-3p	Grm3	glutamate receptor, metabotropic 3
Details	766	52	mmu-miR-21a-3p	Pcdha2	protocadherin alpha 2
Details	767	52	mmu-miR-21a-3p	Pcdha6	protocadherin alpha 6
Details	768	52	mmu-miR-21a-3p	Lnpep	leucyl/cystinyl aminopeptidase
Details	769	52	mmu-miR-21a-3p	Chrna9	cholinergic receptor, nicotinic, alpha polypeptide 9
Details	770	52	mmu-miR-21a-3p	Pcdha9	protocadherin alpha 9
Details	771	52	mmu-miR-21a-3p	Ak4	adenylate kinase 4
Details	772	52	mmu-miR-21a-3p	Pabpc4l	poly(A) binding protein, cytoplasmic 4-like
Details	773	52	mmu-miR-21a-3p	D030056L22Rik	RIKEN cDNA D030056L22 gene
Details	774	52	mmu-miR-21a-3p	Naa35	N(alpha)-acetyltransferase 35, NatC auxiliary subunit
Details	775	52	mmu-miR-21a-3p	Myoz3	myozenin 3
Details	776	52	mmu-miR-21a-3p	Rassf3	Ras association (RalGDS/AF-6) domain family member 3
Details	777	52	mmu-miR-21a-3p	Pcdhac1	protocadherin alpha subfamily C, 1
Details	778	52	mmu-miR-21a-3p	Ube2d2a	ubiquitin-conjugating enzyme E2D 2A
Details	779	52	mmu-miR-21a-3p	9530068E07Rik	RIKEN cDNA 9530068E07 gene
Details	780	52	mmu-miR-21a-3p	Pcdha7	protocadherin alpha 7
Details	781	52	mmu-miR-21a-3p	Zfp777	zinc finger protein 777
Details	782	52	mmu-miR-21a-3p	Ccny	cyclin Y
Details	783	52	mmu-miR-21a-3p	Pcdha3	protocadherin alpha 3
Details	784	52	mmu-miR-21a-3p	Pcdha4	protocadherin alpha 4
Details	785	52	mmu-miR-21a-3p	Pin1	protein (peptidyl-prolyl cis/trans isomerase) NIMA-interacting 1
Details	786	52	mmu-miR-21a-3p	Pcdha1	protocadherin alpha 1
Details	787	52	mmu-miR-21a-3p	Pcdha8	protocadherin alpha 8
Details	788	52	mmu-miR-21a-3p	Wsb1	WD repeat and SOCS box-containing 1
Details	789	52	mmu-miR-21a-3p	Zbtb18	zinc finger and BTB domain containing 18
Details	790	52	mmu-miR-21a-3p	Zmat3	zinc finger matrin type 3
Details	791	52	mmu-miR-21a-3p	Prdm15	PR domain containing 15
Details	792	52	mmu-miR-21a-3p	Eif1a	eukaryotic translation initiation factor 1A
Details	793	52	mmu-miR-21a-3p	Ncoa3	nuclear receptor coactivator 3
Details	794	52	mmu-miR-21a-3p	Pcdha12	protocadherin alpha 12
Details	795	52	mmu-miR-21a-3p	Smim13	small integral membrane protein 13
Details	796	52	mmu-miR-21a-3p	Pcdha5	protocadherin alpha 5
Details	797	52	mmu-miR-21a-3p	Pcdhac2	protocadherin alpha subfamily C, 2
Details	798	51	mmu-miR-21a-3p	Trpv1	transient receptor potential cation channel, subfamily V, member 1
Details	799	51	mmu-miR-21a-3p	Slc35b4	solute carrier family 35, member B4
Details	800	51	mmu-miR-21a-3p	Cdh17	cadherin 17
Details	801	51	mmu-miR-21a-3p	Asxl3	additional sex combs like 3, transcriptional regulator
Details	802	51	mmu-miR-21a-3p	Dctn4	dynactin 4
Details	803	51	mmu-miR-21a-3p	Tmc7	transmembrane channel-like gene family 7
Details	804	51	mmu-miR-21a-3p	Zfp866	zinc finger protein 866
Details	805	51	mmu-miR-21a-3p	Chpt1	choline phosphotransferase 1
Details	806	51	mmu-miR-21a-3p	Zfp831	zinc finger protein 831
Details	807	51	mmu-miR-21a-3p	Gabrg1	gamma-aminobutyric acid (GABA) A receptor, subunit gamma 1
Details	808	51	mmu-miR-21a-3p	Ufl1	UFM1 specific ligase 1
Details	809	51	mmu-miR-21a-3p	Gm21761	predicted gene, 21761
Details	810	51	mmu-miR-21a-3p	Unc5c	unc-5 netrin receptor C
Details	811	51	mmu-miR-21a-3p	Rpl29	ribosomal protein L29
Details	812	51	mmu-miR-21a-3p	Nsun3	NOL1/NOP2/Sun domain family member 3
Details	813	51	mmu-miR-21a-3p	Agpat5	1-acylglycerol-3-phosphate O-acyltransferase 5 (lysophosphatidic acid acyltransferase, epsilon)
Details	814	51	mmu-miR-21a-3p	Gm10408	predicted gene 10408
Details	815	51	mmu-miR-21a-3p	Usp13	ubiquitin specific peptidase 13 (isopeptidase T-3)
Details	816	51	mmu-miR-21a-3p	Ap2b1	adaptor-related protein complex 2, beta 1 subunit
Details	817	51	mmu-miR-21a-3p	Enah	ENAH actin regulator
Details	818	51	mmu-miR-21a-3p	Gm10471	predicted gene 10471
Details	819	51	mmu-miR-21a-3p	Uba1y	ubiquitin-activating enzyme, Chr Y
Details	820	51	mmu-miR-21a-3p	Aktip	thymoma viral proto-oncogene 1 interacting protein
Details	821	51	mmu-miR-21a-3p	Pold3	polymerase (DNA-directed), delta 3, accessory subunit
Details	822	51	mmu-miR-21a-3p	Zfp950	zinc finger protein 950
Details	823	51	mmu-miR-21a-3p	Nkx2-9	NK2 homeobox 9
Details	824	51	mmu-miR-21a-3p	Vezt	vezatin, adherens junctions transmembrane protein
Details	825	51	mmu-miR-21a-3p	B020031M17Rik	RIKEN cDNA B020031M17 gene
Details	826	51	mmu-miR-21a-3p	Sln	sarcolipin
Details	827	51	mmu-miR-21a-3p	Prrxl1	paired related homeobox protein-like 1
Details	828	51	mmu-miR-21a-3p	Gm20767	predicted gene, 20767
Details	829	51	mmu-miR-21a-3p	Lrat	lecithin-retinol acyltransferase (phosphatidylcholine-retinol-O-acyltransferase)
Details	830	51	mmu-miR-21a-3p	Meis2	Meis homeobox 2
Details	831	51	mmu-miR-21a-3p	Ccl27a	chemokine (C-C motif) ligand 27A
Details	832	51	mmu-miR-21a-3p	AF067061	cDNA sequence AF067061
Details	833	50	mmu-miR-21a-3p	Arsk	arylsulfatase K
Details	834	50	mmu-miR-21a-3p	Tpgs2	tubulin polyglutamylase complex subunit 2
Details	835	50	mmu-miR-21a-3p	Scn2a	sodium channel, voltage-gated, type II, alpha
Details	836	50	mmu-miR-21a-3p	Clic5	chloride intracellular channel 5
Details	837	50	mmu-miR-21a-3p	Foxj3	forkhead box J3
Details	838	50	mmu-miR-21a-3p	Cep55	centrosomal protein 55
Details	839	50	mmu-miR-21a-3p	Fnbp4	formin binding protein 4
Details	840	50	mmu-miR-21a-3p	Igsf11	immunoglobulin superfamily, member 11
Details	841	50	mmu-miR-21a-3p	Hoxd13	homeobox D13
Details	842	50	mmu-miR-21a-3p	Pla2r1	phospholipase A2 receptor 1
Details	843	50	mmu-miR-21a-3p	Mtmr12	myotubularin related protein 12
Details	844	50	mmu-miR-21a-3p	Scn8a	sodium channel, voltage-gated, type VIII, alpha
Details	845	50	mmu-miR-21a-3p	Bcas2	breast carcinoma amplified sequence 2
Details	846	50	mmu-miR-21a-3p	Rapgef4	Rap guanine nucleotide exchange factor (GEF) 4
Details	847	50	mmu-miR-21a-3p	Mia2	melanoma inhibitory activity 2
Details	848	50	mmu-miR-21a-3p	Serpinb9c	serine (or cysteine) peptidase inhibitor, clade B, member 9c
Details	849	50	mmu-miR-21a-3p	Phf11b	PHD finger protein 11B
Details	850	50	mmu-miR-21a-3p	Zfp81	zinc finger protein 81
Details	851	50	mmu-miR-21a-3p	Cdkn2aip	CDKN2A interacting protein
Details	852	50	mmu-miR-21a-3p	C1galt1	core 1 synthase, glycoprotein-N-acetylgalactosamine 3-beta-galactosyltransferase, 1
Details	853	50	mmu-miR-21a-3p	Rfc1	replication factor C (activator 1) 1
Details	854	50	mmu-miR-21a-3p	Tacc1	transforming, acidic coiled-coil containing protein 1
Details	1	99	mmu-miR-21a-5p	Zfp367	zinc finger protein 367
Details	2	98	mmu-miR-21a-5p	Crebrf	CREB3 regulatory factor
Details	3	98	mmu-miR-21a-5p	Pan3	PAN3 poly(A) specific ribonuclease subunit
Details	4	97	mmu-miR-21a-5p	Adgrg2	adhesion G protein-coupled receptor G2
Details	5	97	mmu-miR-21a-5p	Fasl	Fas ligand (TNF superfamily, member 6)
Details	6	97	mmu-miR-21a-5p	Dusp8	dual specificity phosphatase 8
Details	7	97	mmu-miR-21a-5p	Nectin3	nectin cell adhesion molecule 3
Details	8	97	mmu-miR-21a-5p	Tgfbi	transforming growth factor, beta induced
Details	9	96	mmu-miR-21a-5p	Spink14	serine peptidase inhibitor, Kazal type 14
Details	10	96	mmu-miR-21a-5p	Fgf18	fibroblast growth factor 18
Details	11	96	mmu-miR-21a-5p	Pbrm1	polybromo 1
Details	12	95	mmu-miR-21a-5p	Tent5a	terminal nucleotidyltransferase 5A
Details	13	94	mmu-miR-21a-5p	Peli1	pellino 1
Details	14	94	mmu-miR-21a-5p	Pnpt1	polyribonucleotide nucleotidyltransferase 1
Details	15	94	mmu-miR-21a-5p	Spry1	sprouty RTK signaling antagonist 1
Details	16	94	mmu-miR-21a-5p	Il21	interleukin 21
Details	17	94	mmu-miR-21a-5p	Ifrd1	interferon-related developmental regulator 1
Details	18	93	mmu-miR-21a-5p	Ccl1	chemokine (C-C motif) ligand 1
Details	19	93	mmu-miR-21a-5p	Tsga10	testis specific 10
Details	20	93	mmu-miR-21a-5p	Armcx1	armadillo repeat containing, X-linked 1
Details	21	93	mmu-miR-21a-5p	Ankrd49	ankyrin repeat domain 49
Details	22	93	mmu-miR-21a-5p	Scml2	Scm polycomb group protein like 2
Details	23	93	mmu-miR-21a-5p	Fa2h	fatty acid 2-hydroxylase
Details	24	92	mmu-miR-21a-5p	Dmrtc2	doublesex and mab-3 related transcription factor like family C2
Details	25	92	mmu-miR-21a-5p	Gramd3	GRAM domain containing 3
Details	26	92	mmu-miR-21a-5p	Caskin1	CASK interacting protein 1
Details	27	92	mmu-miR-21a-5p	Bcl7a	B cell CLL/lymphoma 7A
Details	28	92	mmu-miR-21a-5p	Ski	ski sarcoma viral oncogene homolog (avian)
Details	29	92	mmu-miR-21a-5p	Nkiras1	NFKB inhibitor interacting Ras-like protein 1
Details	30	91	mmu-miR-21a-5p	Cpeb3	cytoplasmic polyadenylation element binding protein 3
Details	31	91	mmu-miR-21a-5p	Tmem236	transmembrane protein 236
Details	32	91	mmu-miR-21a-5p	Pcmtd2	protein-L-isoaspartate (D-aspartate) O-methyltransferase domain containing 2
Details	33	91	mmu-miR-21a-5p	Ntf3	neurotrophin 3
Details	34	91	mmu-miR-21a-5p	Armcx5	armadillo repeat containing, X-linked 5
Details	35	91	mmu-miR-21a-5p	Map3k1	mitogen-activated protein kinase kinase kinase 1
Details	36	91	mmu-miR-21a-5p	Mprip	myosin phosphatase Rho interacting protein
Details	37	91	mmu-miR-21a-5p	Ubr3	ubiquitin protein ligase E3 component n-recognin 3
Details	38	90	mmu-miR-21a-5p	Arhgap24	Rho GTPase activating protein 24
Details	39	90	mmu-miR-21a-5p	Tmem170	transmembrane protein 170
Details	40	90	mmu-miR-21a-5p	Tipin	timeless interacting protein
Details	41	90	mmu-miR-21a-5p	Necab1	N-terminal EF-hand calcium binding protein 1
Details	42	90	mmu-miR-21a-5p	Rmnd5a	required for meiotic nuclear division 5 homolog A
Details	43	90	mmu-miR-21a-5p	Bcl11b	B cell leukemia/lymphoma 11B
Details	44	90	mmu-miR-21a-5p	Ccl20	chemokine (C-C motif) ligand 20
Details	45	89	mmu-miR-21a-5p	Kdm7a	lysine (K)-specific demethylase 7A
Details	46	89	mmu-miR-21a-5p	Srl	sarcalumenin
Details	47	89	mmu-miR-21a-5p	Ranbp3l	RAN binding protein 3-like
Details	48	89	mmu-miR-21a-5p	Hnrnpk	heterogeneous nuclear ribonucleoprotein K
Details	49	89	mmu-miR-21a-5p	Il12a	interleukin 12a
Details	50	89	mmu-miR-21a-5p	Acvr2a	activin receptor IIA
Details	51	89	mmu-miR-21a-5p	Zdhhc17	zinc finger, DHHC domain containing 17
Details	52	89	mmu-miR-21a-5p	Yod1	YOD1 deubiquitinase
Details	53	88	mmu-miR-21a-5p	Edrf1	erythroid differentiation regulatory factor 1
Details	54	88	mmu-miR-21a-5p	Dvl2	dishevelled segment polarity protein 2
Details	55	88	mmu-miR-21a-5p	Zfp27	zinc finger protein 27
Details	56	88	mmu-miR-21a-5p	Tmtc3	transmembrane and tetratricopeptide repeat containing 3
Details	57	88	mmu-miR-21a-5p	Ppp1r3b	protein phosphatase 1, regulatory subunit 3B
Details	58	88	mmu-miR-21a-5p	Spry2	sprouty RTK signaling antagonist 2
Details	59	87	mmu-miR-21a-5p	Glis2	GLIS family zinc finger 2
Details	60	87	mmu-miR-21a-5p	Lsm5	LSM5 homolog, U6 small nuclear RNA and mRNA degradation associated
Details	61	87	mmu-miR-21a-5p	Epha4	Eph receptor A4
Details	62	87	mmu-miR-21a-5p	Mreg	melanoregulin
Details	63	87	mmu-miR-21a-5p	Sox5	SRY (sex determining region Y)-box 5
Details	64	87	mmu-miR-21a-5p	Jph1	junctophilin 1
Details	65	87	mmu-miR-21a-5p	Edil3	EGF-like repeats and discoidin I-like domains 3
Details	66	87	mmu-miR-21a-5p	Ndufv2	NADH:ubiquinone oxidoreductase core subunit V2
Details	67	87	mmu-miR-21a-5p	Acsm2	acyl-CoA synthetase medium-chain family member 2
Details	68	87	mmu-miR-21a-5p	Rbms3	RNA binding motif, single stranded interacting protein
Details	69	87	mmu-miR-21a-5p	Akap6	A kinase (PRKA) anchor protein 6
Details	70	87	mmu-miR-21a-5p	Matn2	matrilin 2
Details	71	87	mmu-miR-21a-5p	Yap1	yes-associated protein 1
Details	72	86	mmu-miR-21a-5p	Ipo11	importin 11
Details	73	86	mmu-miR-21a-5p	Pja2	praja ring finger ubiquitin ligase 2
Details	74	86	mmu-miR-21a-5p	Nfia	nuclear factor I/A
Details	75	86	mmu-miR-21a-5p	Map2k3	mitogen-activated protein kinase kinase 3
Details	76	86	mmu-miR-21a-5p	Fgd4	FYVE, RhoGEF and PH domain containing 4
Details	77	86	mmu-miR-21a-5p	Hnrnpu	heterogeneous nuclear ribonucleoprotein U
Details	78	86	mmu-miR-21a-5p	Fmn1	formin 1
Details	79	86	mmu-miR-21a-5p	B3galt1	UDP-Gal:betaGlcNAc beta 1,3-galactosyltransferase, polypeptide 1
Details	80	86	mmu-miR-21a-5p	Mbd4	methyl-CpG binding domain protein 4
Details	81	86	mmu-miR-21a-5p	Gm4894	predicted gene 4894
Details	82	86	mmu-miR-21a-5p	Ppp1r3a	protein phosphatase 1, regulatory subunit 3A
Details	83	85	mmu-miR-21a-5p	Glcci1	glucocorticoid induced transcript 1
Details	84	85	mmu-miR-21a-5p	Zfp229	zinc finger protein 229
Details	85	85	mmu-miR-21a-5p	Cwh43	cell wall biogenesis 43 C-terminal homolog
Details	86	85	mmu-miR-21a-5p	Stag2	stromal antigen 2
Details	87	85	mmu-miR-21a-5p	Mindy2	MINDY lysine 48 deubiquitinase 2
Details	88	84	mmu-miR-21a-5p	Sc5d	sterol-C5-desaturase
Details	89	84	mmu-miR-21a-5p	Pcsk6	proprotein convertase subtilisin/kexin type 6
Details	90	84	mmu-miR-21a-5p	Smad7	SMAD family member 7
Details	91	84	mmu-miR-21a-5p	Fnip1	folliculin interacting protein 1
Details	92	84	mmu-miR-21a-5p	Rasgrp1	RAS guanyl releasing protein 1
Details	93	84	mmu-miR-21a-5p	Elf2	E74-like factor 2
Details	94	84	mmu-miR-21a-5p	Slc30a10	solute carrier family 30, member 10
Details	95	83	mmu-miR-21a-5p	Ank2	ankyrin 2, brain
Details	96	83	mmu-miR-21a-5p	Frat1	frequently rearranged in advanced T cell lymphomas
Details	97	83	mmu-miR-21a-5p	Ehd1	EH-domain containing 1
Details	98	83	mmu-miR-21a-5p	Btg2	B cell translocation gene 2, anti-proliferative
Details	99	83	mmu-miR-21a-5p	Prkci	protein kinase C, iota
Details	100	83	mmu-miR-21a-5p	Hipk3	homeodomain interacting protein kinase 3
Details	101	83	mmu-miR-21a-5p	Pdcd4	programmed cell death 4
Details	102	83	mmu-miR-21a-5p	Osr1	odd-skipped related transcription factor 1
Details	103	82	mmu-miR-21a-5p	Ube2d3	ubiquitin-conjugating enzyme E2D 3
Details	104	82	mmu-miR-21a-5p	Reck	reversion-inducing-cysteine-rich protein with kazal motifs
Details	105	82	mmu-miR-21a-5p	Plxna2	plexin A2
Details	106	82	mmu-miR-21a-5p	Fsd1l	fibronectin type III and SPRY domain containing 1-like
Details	107	82	mmu-miR-21a-5p	Pik3r1	phosphoinositide-3-kinase regulatory subunit 1
Details	108	82	mmu-miR-21a-5p	Zfp955b	zinc finger protein 955B
Details	109	82	mmu-miR-21a-5p	Pitx2	paired-like homeodomain transcription factor 2
Details	110	81	mmu-miR-21a-5p	Ndnf	neuron-derived neurotrophic factor
Details	111	81	mmu-miR-21a-5p	Rab11a	RAB11A, member RAS oncogene family
Details	112	81	mmu-miR-21a-5p	Dlgap1	DLG associated protein 1
Details	113	81	mmu-miR-21a-5p	Rsad2	radical S-adenosyl methionine domain containing 2
Details	114	81	mmu-miR-21a-5p	Vcl	vinculin
Details	115	80	mmu-miR-21a-5p	Jag1	jagged 1
Details	116	80	mmu-miR-21a-5p	Proser2	proline and serine rich 2
Details	117	80	mmu-miR-21a-5p	Tmem17	transmembrane protein 17
Details	118	80	mmu-miR-21a-5p	Ms4a1	membrane-spanning 4-domains, subfamily A, member 1
Details	119	80	mmu-miR-21a-5p	Pcbp2	poly(rC) binding protein 2
Details	120	80	mmu-miR-21a-5p	Nfib	nuclear factor I/B
Details	121	80	mmu-miR-21a-5p	Sema5a	sema domain, seven thrombospondin repeats (type 1 and type 1-like), transmembrane domain (TM) and short cytoplasmic domain, (semaphorin) 5A
Details	122	79	mmu-miR-21a-5p	Cstf3	cleavage stimulation factor, 3' pre-RNA, subunit 3
Details	123	79	mmu-miR-21a-5p	Trim52	tripartite motif-containing 52
Details	124	79	mmu-miR-21a-5p	Pcm1	pericentriolar material 1
Details	125	79	mmu-miR-21a-5p	Trappc8	trafficking protein particle complex 8
Details	126	79	mmu-miR-21a-5p	Slc29a3	solute carrier family 29 (nucleoside transporters), member 3
Details	127	79	mmu-miR-21a-5p	Abraxas1	BRCA1 A complex subunit
Details	128	79	mmu-miR-21a-5p	Asb1	ankyrin repeat and SOCS box-containing 1
Details	129	79	mmu-miR-21a-5p	Ring1	ring finger protein 1
Details	130	78	mmu-miR-21a-5p	Adtrp	androgen dependent TFPI regulating protein
Details	131	78	mmu-miR-21a-5p	Pcbp1	poly(rC) binding protein 1
Details	132	78	mmu-miR-21a-5p	Mblac2	metallo-beta-lactamase domain containing 2
Details	133	78	mmu-miR-21a-5p	Thrb	thyroid hormone receptor beta
Details	134	78	mmu-miR-21a-5p	Mtmr12	myotubularin related protein 12
Details	135	78	mmu-miR-21a-5p	Adnp	activity-dependent neuroprotective protein
Details	136	78	mmu-miR-21a-5p	Bnc2	basonuclin 2
Details	137	77	mmu-miR-21a-5p	Tssk2	testis-specific serine kinase 2
Details	138	77	mmu-miR-21a-5p	Tnrc6b	trinucleotide repeat containing 6b
Details	139	77	mmu-miR-21a-5p	Rasa1	RAS p21 protein activator 1
Details	140	77	mmu-miR-21a-5p	Tagap	T cell activation Rho GTPase activating protein
Details	141	77	mmu-miR-21a-5p	Mybl1	myeloblastosis oncogene-like 1
Details	142	77	mmu-miR-21a-5p	Wdr78	WD repeat domain 78
Details	143	77	mmu-miR-21a-5p	Rnf2	ring finger protein 2
Details	144	76	mmu-miR-21a-5p	Ccl22	chemokine (C-C motif) ligand 22
Details	145	76	mmu-miR-21a-5p	Zbtb41	zinc finger and BTB domain containing 41
Details	146	76	mmu-miR-21a-5p	Rspo3	R-spondin 3
Details	147	76	mmu-miR-21a-5p	Il33	interleukin 33
Details	148	76	mmu-miR-21a-5p	Klf6	Kruppel-like factor 6
Details	149	75	mmu-miR-21a-5p	Slc9a6	solute carrier family 9 (sodium/hydrogen exchanger), member 6
Details	150	75	mmu-miR-21a-5p	Skp2	S-phase kinase-associated protein 2 (p45)
Details	151	75	mmu-miR-21a-5p	Sgms2	sphingomyelin synthase 2
Details	152	75	mmu-miR-21a-5p	Fbxo28	F-box protein 28
Details	153	75	mmu-miR-21a-5p	Lrrcc1	leucine rich repeat and coiled-coil domain containing 1
Details	154	74	mmu-miR-21a-5p	Itgav	integrin alpha V
Details	155	74	mmu-miR-21a-5p	Brd2	bromodomain containing 2
Details	156	74	mmu-miR-21a-5p	Ganc	glucosidase, alpha; neutral C
Details	157	73	mmu-miR-21a-5p	Gtf2e2	general transcription factor II E, polypeptide 2 (beta subunit)
Details	158	73	mmu-miR-21a-5p	Pom121	nuclear pore membrane protein 121
Details	159	73	mmu-miR-21a-5p	Mynn	myoneurin
Details	160	73	mmu-miR-21a-5p	Arhgap31	Rho GTPase activating protein 31
Details	161	73	mmu-miR-21a-5p	Ubl4a	ubiquitin-like 4A
Details	162	73	mmu-miR-21a-5p	Ing3	inhibitor of growth family, member 3
Details	163	73	mmu-miR-21a-5p	Plekha1	pleckstrin homology domain containing, family A (phosphoinositide binding specific) member 1
Details	164	73	mmu-miR-21a-5p	Agtr1b	angiotensin II receptor, type 1b
Details	165	73	mmu-miR-21a-5p	Klf12	Kruppel-like factor 12
Details	166	73	mmu-miR-21a-5p	Pde6a	phosphodiesterase 6A, cGMP-specific, rod, alpha
Details	167	72	mmu-miR-21a-5p	Ostn	osteocrin
Details	168	72	mmu-miR-21a-5p	Hmgn2	high mobility group nucleosomal binding domain 2
Details	169	72	mmu-miR-21a-5p	Mbnl3	muscleblind like splicing factor 3
Details	170	71	mmu-miR-21a-5p	Zfp704	zinc finger protein 704
Details	171	71	mmu-miR-21a-5p	Olfr1426	olfactory receptor 1426
Details	172	71	mmu-miR-21a-5p	Fbxo11	F-box protein 11
Details	173	71	mmu-miR-21a-5p	Zfp110	zinc finger protein 110
Details	174	71	mmu-miR-21a-5p	Gm3985	predicted gene 3985
Details	175	71	mmu-miR-21a-5p	Mbnl1	muscleblind like splicing factor 1
Details	176	70	mmu-miR-21a-5p	Alx1	ALX homeobox 1
Details	177	70	mmu-miR-21a-5p	Slit2	slit guidance ligand 2
Details	178	70	mmu-miR-21a-5p	Smpd4	sphingomyelin phosphodiesterase 4
Details	179	70	mmu-miR-21a-5p	Dclk1	doublecortin-like kinase 1
Details	180	69	mmu-miR-21a-5p	Mapre1	microtubule-associated protein, RP/EB family, member 1
Details	181	69	mmu-miR-21a-5p	Hspa14	heat shock protein 14
Details	182	69	mmu-miR-21a-5p	Wwp1	WW domain containing E3 ubiquitin protein ligase 1
Details	183	69	mmu-miR-21a-5p	Csrnp3	cysteine-serine-rich nuclear protein 3
Details	184	69	mmu-miR-21a-5p	Tnfaip3	tumor necrosis factor, alpha-induced protein 3
Details	185	69	mmu-miR-21a-5p	Trmt10a	tRNA methyltransferase 10A
Details	186	69	mmu-miR-21a-5p	Scnn1g	sodium channel, nonvoltage-gated 1 gamma
Details	187	69	mmu-miR-21a-5p	Casc4	cancer susceptibility candidate 4
Details	188	68	mmu-miR-21a-5p	Fmo2	flavin containing monooxygenase 2
Details	189	68	mmu-miR-21a-5p	Hnrnpa3	heterogeneous nuclear ribonucleoprotein A3
Details	190	68	mmu-miR-21a-5p	Ralgps2	Ral GEF with PH domain and SH3 binding motif 2
Details	191	68	mmu-miR-21a-5p	ccdc198	coiled-coil domain containing 198
Details	192	68	mmu-miR-21a-5p	1190002N15Rik	RIKEN cDNA 1190002N15 gene
Details	193	68	mmu-miR-21a-5p	Plag1	pleiomorphic adenoma gene 1
Details	194	68	mmu-miR-21a-5p	Adk	adenosine kinase
Details	195	68	mmu-miR-21a-5p	Ppara	peroxisome proliferator activated receptor alpha
Details	196	68	mmu-miR-21a-5p	Zfp882	zinc finger protein 882
Details	197	68	mmu-miR-21a-5p	Fam161b	family with sequence similarity 161, member B
Details	198	68	mmu-miR-21a-5p	Nr4a1	nuclear receptor subfamily 4, group A, member 1
Details	199	68	mmu-miR-21a-5p	Xkr6	X-linked Kx blood group related 6
Details	200	68	mmu-miR-21a-5p	Sos2	SOS Ras/Rho guanine nucleotide exchange factor 2
Details	201	68	mmu-miR-21a-5p	Sgcb	sarcoglycan, beta (dystrophin-associated glycoprotein)
Details	202	67	mmu-miR-21a-5p	Slc35a5	solute carrier family 35, member A5
Details	203	67	mmu-miR-21a-5p	Scrn1	secernin 1
Details	204	67	mmu-miR-21a-5p	Dnaja1	DnaJ heat shock protein family (Hsp40) member A1
Details	205	67	mmu-miR-21a-5p	Tiam1	T cell lymphoma invasion and metastasis 1
Details	206	67	mmu-miR-21a-5p	Six5	sine oculis-related homeobox 5
Details	207	67	mmu-miR-21a-5p	Epm2aip1	EPM2A (laforin) interacting protein 1
Details	208	67	mmu-miR-21a-5p	Msx1	msh homeobox 1
Details	209	67	mmu-miR-21a-5p	Slamf7	SLAM family member 7
Details	210	67	mmu-miR-21a-5p	Cnr1	cannabinoid receptor 1 (brain)
Details	211	67	mmu-miR-21a-5p	Map3k7	mitogen-activated protein kinase kinase kinase 7
Details	212	67	mmu-miR-21a-5p	Epyc	epiphycan
Details	213	66	mmu-miR-21a-5p	Bahd1	bromo adjacent homology domain containing 1
Details	214	66	mmu-miR-21a-5p	Aspn	asporin
Details	215	66	mmu-miR-21a-5p	Rsl1	regulator of sex limited protein 1
Details	216	66	mmu-miR-21a-5p	Wdr76	WD repeat domain 76
Details	217	66	mmu-miR-21a-5p	Zcchc24	zinc finger, CCHC domain containing 24
Details	218	66	mmu-miR-21a-5p	Timp3	tissue inhibitor of metalloproteinase 3
Details	219	66	mmu-miR-21a-5p	Gm1110	predicted gene 1110
Details	220	66	mmu-miR-21a-5p	Zswim6	zinc finger SWIM-type containing 6
Details	221	66	mmu-miR-21a-5p	Nfatc3	nuclear factor of activated T cells, cytoplasmic, calcineurin dependent 3
Details	222	66	mmu-miR-21a-5p	Pnrc2	proline-rich nuclear receptor coactivator 2
Details	223	65	mmu-miR-21a-5p	Skint7	selection and upkeep of intraepithelial T cells 7
Details	224	64	mmu-miR-21a-5p	Tagap1	T cell activation GTPase activating protein 1
Details	225	64	mmu-miR-21a-5p	Tesk2	testis-specific kinase 2
Details	226	64	mmu-miR-21a-5p	Acvr1c	activin A receptor, type IC
Details	227	64	mmu-miR-21a-5p	Magee2	melanoma antigen, family E, 2
Details	228	64	mmu-miR-21a-5p	Trim33	tripartite motif-containing 33
Details	229	64	mmu-miR-21a-5p	Ispd	isoprenoid synthase domain containing
Details	230	64	mmu-miR-21a-5p	Kcnv1	potassium channel, subfamily V, member 1
Details	231	64	mmu-miR-21a-5p	Klhl42	kelch-like 42
Details	232	64	mmu-miR-21a-5p	St6galnac3	ST6 (alpha-N-acetyl-neuraminyl-2,3-beta-galactosyl-1,3)-N-acetylgalactosaminide alpha-2,6-sialyltransferase 3
Details	233	63	mmu-miR-21a-5p	Nkain2	Na+/K+ transporting ATPase interacting 2
Details	234	63	mmu-miR-21a-5p	Lipk	lipase, family member K
Details	235	63	mmu-miR-21a-5p	Col12a1	collagen, type XII, alpha 1
Details	236	63	mmu-miR-21a-5p	Omd	osteomodulin
Details	237	63	mmu-miR-21a-5p	Acat1	acetyl-Coenzyme A acetyltransferase 1
Details	238	63	mmu-miR-21a-5p	Herc6	hect domain and RLD 6
Details	239	63	mmu-miR-21a-5p	Pdcl3	phosducin-like 3
Details	240	62	mmu-miR-21a-5p	Taf7	TATA-box binding protein associated factor 7
Details	241	62	mmu-miR-21a-5p	Cnot6l	CCR4-NOT transcription complex, subunit 6-like
Details	242	62	mmu-miR-21a-5p	Arl4a	ADP-ribosylation factor-like 4A
Details	243	62	mmu-miR-21a-5p	Nt5e	5' nucleotidase, ecto
Details	244	62	mmu-miR-21a-5p	Ndufaf4	NADH:ubiquinone oxidoreductase complex assembly factor 4
Details	245	62	mmu-miR-21a-5p	Hpgd	hydroxyprostaglandin dehydrogenase 15 (NAD)
Details	246	62	mmu-miR-21a-5p	Cdc25a	cell division cycle 25A
Details	247	62	mmu-miR-21a-5p	Mef2c	myocyte enhancer factor 2C
Details	248	62	mmu-miR-21a-5p	Pdhx	pyruvate dehydrogenase complex, component X
Details	249	62	mmu-miR-21a-5p	Tmem29	transmembrane protein 29
Details	250	62	mmu-miR-21a-5p	Esyt2	extended synaptotagmin-like protein 2
Details	251	62	mmu-miR-21a-5p	Upk1b	uroplakin 1B
Details	252	62	mmu-miR-21a-5p	Il2ra	interleukin 2 receptor, alpha chain
Details	253	61	mmu-miR-21a-5p	Eif2a	eukaryotic translation initiation factor 2A
Details	254	61	mmu-miR-21a-5p	Ptpn21	protein tyrosine phosphatase, non-receptor type 21
Details	255	61	mmu-miR-21a-5p	Kalrn	kalirin, RhoGEF kinase
Details	256	61	mmu-miR-21a-5p	Gid4	GID complex subunit 4, VID24 homolog
Details	257	61	mmu-miR-21a-5p	Reg3b	regenerating islet-derived 3 beta
Details	258	61	mmu-miR-21a-5p	Stat3	signal transducer and activator of transcription 3
Details	259	61	mmu-miR-21a-5p	F5	coagulation factor V
Details	260	60	mmu-miR-21a-5p	Akirin1	akirin 1
Details	261	60	mmu-miR-21a-5p	Pfkm	phosphofructokinase, muscle
Details	262	60	mmu-miR-21a-5p	Arl2bp	ADP-ribosylation factor-like 2 binding protein
Details	263	60	mmu-miR-21a-5p	Cadm2	cell adhesion molecule 2
Details	264	60	mmu-miR-21a-5p	Mzf1	myeloid zinc finger 1
Details	265	60	mmu-miR-21a-5p	Zfp36l2	zinc finger protein 36, C3H type-like 2
Details	266	60	mmu-miR-21a-5p	Hs3st1	heparan sulfate (glucosamine) 3-O-sulfotransferase 1
Details	267	60	mmu-miR-21a-5p	Slc25a46	solute carrier family 25, member 46
Details	268	60	mmu-miR-21a-5p	Tmem229a	transmembrane protein 229A
Details	269	59	mmu-miR-21a-5p	Nedd4	neural precursor cell expressed, developmentally down-regulated 4
Details	270	59	mmu-miR-21a-5p	Kbtbd7	kelch repeat and BTB (POZ) domain containing 7
Details	271	59	mmu-miR-21a-5p	Bcl11a	B cell CLL/lymphoma 11A (zinc finger protein)
Details	272	59	mmu-miR-21a-5p	Tmtc1	transmembrane and tetratricopeptide repeat containing 1
Details	273	59	mmu-miR-21a-5p	Sez6l	seizure related 6 homolog like
Details	274	59	mmu-miR-21a-5p	Svep1	sushi, von Willebrand factor type A, EGF and pentraxin domain containing 1
Details	275	59	mmu-miR-21a-5p	Stk40	serine/threonine kinase 40
Details	276	59	mmu-miR-21a-5p	Per2	period circadian clock 2
Details	277	59	mmu-miR-21a-5p	Rgcc	regulator of cell cycle
Details	278	59	mmu-miR-21a-5p	Slc7a6	solute carrier family 7 (cationic amino acid transporter, y+ system), member 6
Details	279	58	mmu-miR-21a-5p	Dmrtc1a	DMRT-like family C1a
Details	280	58	mmu-miR-21a-5p	Atrn	attractin
Details	281	58	mmu-miR-21a-5p	Mrgprb1	MAS-related GPR, member B1
Details	282	58	mmu-miR-21a-5p	Apol6	apolipoprotein L 6
Details	283	58	mmu-miR-21a-5p	Ccdc47	coiled-coil domain containing 47
Details	284	58	mmu-miR-21a-5p	Tirap	toll-interleukin 1 receptor (TIR) domain-containing adaptor protein
Details	285	58	mmu-miR-21a-5p	Tshz1	teashirt zinc finger family member 1
Details	286	58	mmu-miR-21a-5p	T2	brachyury 2
Details	287	58	mmu-miR-21a-5p	Cxcl10	chemokine (C-X-C motif) ligand 10
Details	288	58	mmu-miR-21a-5p	Pspc1	paraspeckle protein 1
Details	289	58	mmu-miR-21a-5p	Chic1	cysteine-rich hydrophobic domain 1
Details	290	57	mmu-miR-21a-5p	Tmem42	transmembrane protein 42
Details	291	57	mmu-miR-21a-5p	Lrrc55	leucine rich repeat containing 55
Details	292	57	mmu-miR-21a-5p	Wfdc16	WAP four-disulfide core domain 16
Details	293	57	mmu-miR-21a-5p	Relch	RAB11 binding and LisH domain, coiled-coil and HEAT repeat containing
Details	294	57	mmu-miR-21a-5p	Zfp619	zinc finger protein 619
Details	295	57	mmu-miR-21a-5p	Serpina7	serine (or cysteine) peptidase inhibitor, clade A (alpha-1 antiproteinase, antitrypsin), member 7
Details	296	57	mmu-miR-21a-5p	E2f3	E2F transcription factor 3
Details	297	57	mmu-miR-21a-5p	Nus1	NUS1 dehydrodolichyl diphosphate synthase subunit
Details	298	57	mmu-miR-21a-5p	Slc6a1	solute carrier family 6 (neurotransmitter transporter, GABA), member 1
Details	299	57	mmu-miR-21a-5p	Dkk2	dickkopf WNT signaling pathway inhibitor 2
Details	300	57	mmu-miR-21a-5p	Trappc2	trafficking protein particle complex 2
Details	301	56	mmu-miR-21a-5p	Ints2	integrator complex subunit 2
Details	302	56	mmu-miR-21a-5p	Stam	signal transducing adaptor molecule (SH3 domain and ITAM motif) 1
Details	303	56	mmu-miR-21a-5p	Neb	nebulin
Details	304	56	mmu-miR-21a-5p	Wdr44	WD repeat domain 44
Details	305	56	mmu-miR-21a-5p	Nrp	neural regeneration protein
Details	306	55	mmu-miR-21a-5p	Rreb1	ras responsive element binding protein 1
Details	307	55	mmu-miR-21a-5p	Cpne4	copine IV
Details	308	55	mmu-miR-21a-5p	Larp4	La ribonucleoprotein domain family, member 4
Details	309	55	mmu-miR-21a-5p	Saxo2	stabilizer of axonemal microtubules 2
Details	310	54	mmu-miR-21a-5p	Adgra1	adhesion G protein-coupled receptor A1
Details	311	54	mmu-miR-21a-5p	Cacng5	calcium channel, voltage-dependent, gamma subunit 5
Details	312	54	mmu-miR-21a-5p	Adgra3	adhesion G protein-coupled receptor A3
Details	313	54	mmu-miR-21a-5p	Fcrl5	Fc receptor-like 5
Details	314	54	mmu-miR-21a-5p	Zfp811	zinc finger protein 811
Details	315	54	mmu-miR-21a-5p	Sox6	SRY (sex determining region Y)-box 6
Details	316	54	mmu-miR-21a-5p	Zcchc3	zinc finger, CCHC domain containing 3
Details	317	54	mmu-miR-21a-5p	Tacr1	tachykinin receptor 1
Details	318	54	mmu-miR-21a-5p	Hsd17b14	hydroxysteroid (17-beta) dehydrogenase 14
Details	319	53	mmu-miR-21a-5p	Stc1	stanniocalcin 1
Details	320	53	mmu-miR-21a-5p	Ptcd3	pentatricopeptide repeat domain 3
Details	321	53	mmu-miR-21a-5p	Taf5	TATA-box binding protein associated factor 5
Details	322	53	mmu-miR-21a-5p	Rab11fip1	RAB11 family interacting protein 1 (class I)
Details	323	53	mmu-miR-21a-5p	Psrc1	proline/serine-rich coiled-coil 1
Details	324	53	mmu-miR-21a-5p	Arhgap32	Rho GTPase activating protein 32
Details	325	53	mmu-miR-21a-5p	Hbp1	high mobility group box transcription factor 1
Details	326	53	mmu-miR-21a-5p	St8sia6	ST8 alpha-N-acetyl-neuraminide alpha-2,8-sialyltransferase 6
Details	327	53	mmu-miR-21a-5p	Cbx4	chromobox 4
Details	328	53	mmu-miR-21a-5p	Lin28b	lin-28 homolog B (C. elegans)
Details	329	52	mmu-miR-21a-5p	Pex12	peroxisomal biogenesis factor 12
Details	330	52	mmu-miR-21a-5p	Ror1	receptor tyrosine kinase-like orphan receptor 1
Details	331	52	mmu-miR-21a-5p	Galnt12	polypeptide N-acetylgalactosaminyltransferase 12
Details	332	52	mmu-miR-21a-5p	Gpr88	G-protein coupled receptor 88
Details	333	52	mmu-miR-21a-5p	Nfat5	nuclear factor of activated T cells 5
Details	334	52	mmu-miR-21a-5p	Rabgap1l	RAB GTPase activating protein 1-like
Details	335	52	mmu-miR-21a-5p	Rnf167	ring finger protein 167
Details	336	52	mmu-miR-21a-5p	Sema4a	sema domain, immunoglobulin domain (Ig), transmembrane domain (TM) and short cytoplasmic domain, (semaphorin) 4A
Details	337	52	mmu-miR-21a-5p	Peg12	paternally expressed 12
Details	338	52	mmu-miR-21a-5p	Agps	alkylglycerone phosphate synthase
Details	339	51	mmu-miR-21a-5p	Acbd5	acyl-Coenzyme A binding domain containing 5
Details	340	51	mmu-miR-21a-5p	Fstl5	follistatin-like 5
Details	341	51	mmu-miR-21a-5p	Kcnq5	potassium voltage-gated channel, subfamily Q, member 5
Details	342	51	mmu-miR-21a-5p	Slc25a36	solute carrier family 25, member 36
Details	343	51	mmu-miR-21a-5p	Zcchc8	zinc finger, CCHC domain containing 8
Details	344	51	mmu-miR-21a-5p	Bhlhe40	basic helix-loop-helix family, member e40
Details	345	51	mmu-miR-21a-5p	Dio3	deiodinase, iodothyronine type III
Details	346	51	mmu-miR-21a-5p	Pdha1	pyruvate dehydrogenase E1 alpha 1
Details	347	50	mmu-miR-21a-5p	Cnpy1	canopy FGF signaling regulator 1
Details	348	50	mmu-miR-21a-5p	Nexmif	neurite extension and migration factor
Details	349	50	mmu-miR-21a-5p	Spata9	spermatogenesis associated 9
Details	350	50	mmu-miR-21a-5p	Smarcd1	SWI/SNF related, matrix associated, actin dependent regulator of chromatin, subfamily d, member 1
Details	351	50	mmu-miR-21a-5p	Eml6	echinoderm microtubule associated protein like 6
Details	1	96	mmu-miR-146b-3p	Tnfrsf22	tumor necrosis factor receptor superfamily, member 22
Details	2	93	mmu-miR-146b-3p	Tnfrsf23	tumor necrosis factor receptor superfamily, member 23
Details	3	93	mmu-miR-146b-3p	Vma21	VMA21 vacuolar H+-ATPase homolog (S. cerevisiae)
Details	4	90	mmu-miR-146b-3p	Tnpo1	transportin 1
Details	5	90	mmu-miR-146b-3p	Pcdh7	protocadherin 7
Details	6	89	mmu-miR-146b-3p	Cyb561a3	cytochrome b561 family, member A3
Details	7	87	mmu-miR-146b-3p	Sema4f	sema domain, immunoglobulin domain (Ig), TM domain, and short cytoplasmic domain
Details	8	87	mmu-miR-146b-3p	Stat1	signal transducer and activator of transcription 1
Details	9	87	mmu-miR-146b-3p	Axin2	axin 2
Details	10	87	mmu-miR-146b-3p	Hoxd13	homeobox D13
Details	11	86	mmu-miR-146b-3p	Slc25a35	solute carrier family 25, member 35
Details	12	85	mmu-miR-146b-3p	Zswim9	zinc finger SWIM-type containing 9
Details	13	85	mmu-miR-146b-3p	Tmem235	transmembrane protein 235
Details	14	85	mmu-miR-146b-3p	Avpr1b	arginine vasopressin receptor 1B
Details	15	85	mmu-miR-146b-3p	Mall	mal, T cell differentiation protein-like
Details	16	84	mmu-miR-146b-3p	Pgk2	phosphoglycerate kinase 2
Details	17	83	mmu-miR-146b-3p	Selenop	selenoprotein P
Details	18	83	mmu-miR-146b-3p	Tmprss12	transmembrane (C-terminal) protease, serine 12
Details	19	83	mmu-miR-146b-3p	Eif2s1	eukaryotic translation initiation factor 2, subunit 1 alpha
Details	20	81	mmu-miR-146b-3p	U2surp	U2 snRNP-associated SURP domain containing
Details	21	81	mmu-miR-146b-3p	Pkd2l2	polycystic kidney disease 2-like 2
Details	22	80	mmu-miR-146b-3p	Scn8a	sodium channel, voltage-gated, type VIII, alpha
Details	23	80	mmu-miR-146b-3p	Tmprss13	transmembrane protease, serine 13
Details	24	79	mmu-miR-146b-3p	Btg1	B cell translocation gene 1, anti-proliferative
Details	25	79	mmu-miR-146b-3p	E2f8	E2F transcription factor 8
Details	26	79	mmu-miR-146b-3p	Smad4	SMAD family member 4
Details	27	78	mmu-miR-146b-3p	Gemin2	gem nuclear organelle associated protein 2
Details	28	78	mmu-miR-146b-3p	Ide	insulin degrading enzyme
Details	29	78	mmu-miR-146b-3p	Mphosph9	M-phase phosphoprotein 9
Details	30	77	mmu-miR-146b-3p	Fos	FBJ osteosarcoma oncogene
Details	31	77	mmu-miR-146b-3p	Shroom4	shroom family member 4
Details	32	77	mmu-miR-146b-3p	Tgds	TDP-glucose 4,6-dehydratase
Details	33	77	mmu-miR-146b-3p	Pik3ca	phosphatidylinositol-4,5-bisphosphate 3-kinase catalytic subunit alpha
Details	34	76	mmu-miR-146b-3p	Arrdc3	arrestin domain containing 3
Details	35	76	mmu-miR-146b-3p	Npy6r	neuropeptide Y receptor Y6
Details	36	76	mmu-miR-146b-3p	Srpx2	sushi-repeat-containing protein, X-linked 2
Details	37	76	mmu-miR-146b-3p	Tmem238	transmembrane protein 238
Details	38	75	mmu-miR-146b-3p	Mesd	mesoderm development LRP chaperone
Details	39	75	mmu-miR-146b-3p	Tomm7	translocase of outer mitochondrial membrane 7
Details	40	75	mmu-miR-146b-3p	Arrdc4	arrestin domain containing 4
Details	41	75	mmu-miR-146b-3p	Abca5	ATP-binding cassette, sub-family A (ABC1), member 5
Details	42	75	mmu-miR-146b-3p	H2afy	H2A histone family, member Y
Details	43	75	mmu-miR-146b-3p	Fchsd2	FCH and double SH3 domains 2
Details	44	75	mmu-miR-146b-3p	Uox	urate oxidase
Details	45	74	mmu-miR-146b-3p	Pramel7	preferentially expressed antigen in melanoma like 7
Details	46	74	mmu-miR-146b-3p	Gpatch8	G patch domain containing 8
Details	47	74	mmu-miR-146b-3p	Sec61a1	Sec61 alpha 1 subunit (S. cerevisiae)
Details	48	73	mmu-miR-146b-3p	Il17a	interleukin 17A
Details	49	73	mmu-miR-146b-3p	Zpld1	zona pellucida like domain containing 1
Details	50	73	mmu-miR-146b-3p	Pard3	par-3 family cell polarity regulator
Details	51	72	mmu-miR-146b-3p	Lrrc56	leucine rich repeat containing 56
Details	52	71	mmu-miR-146b-3p	Arhgap19	Rho GTPase activating protein 19
Details	53	70	mmu-miR-146b-3p	Lrp6	low density lipoprotein receptor-related protein 6
Details	54	70	mmu-miR-146b-3p	Anp32a	acidic (leucine-rich) nuclear phosphoprotein 32 family, member A
Details	55	70	mmu-miR-146b-3p	Pcdhb18	protocadherin beta 18
Details	56	70	mmu-miR-146b-3p	Rundc3a	RUN domain containing 3A
Details	57	70	mmu-miR-146b-3p	Lage3	L antigen family, member 3
Details	58	70	mmu-miR-146b-3p	Praf2	PRA1 domain family 2
Details	59	70	mmu-miR-146b-3p	Gstt4	glutathione S-transferase, theta 4
Details	60	69	mmu-miR-146b-3p	Cnppd1	cyclin Pas1/PHO80 domain containing 1
Details	61	69	mmu-miR-146b-3p	E2f2	E2F transcription factor 2
Details	62	69	mmu-miR-146b-3p	Kat7	K(lysine) acetyltransferase 7
Details	63	68	mmu-miR-146b-3p	Stk16	serine/threonine kinase 16
Details	64	68	mmu-miR-146b-3p	Cox7a2l	cytochrome c oxidase subunit 7A2 like
Details	65	68	mmu-miR-146b-3p	Aip	aryl-hydrocarbon receptor-interacting protein
Details	66	67	mmu-miR-146b-3p	Nup98	nucleoporin 98
Details	67	67	mmu-miR-146b-3p	Vat1l	vesicle amine transport protein 1 like
Details	68	67	mmu-miR-146b-3p	Sfxn5	sideroflexin 5
Details	69	67	mmu-miR-146b-3p	2210408I21Rik	RIKEN cDNA 2210408I21 gene
Details	70	67	mmu-miR-146b-3p	Fam168a	family with sequence similarity 168, member A
Details	71	67	mmu-miR-146b-3p	Bri3bp	Bri3 binding protein
Details	72	67	mmu-miR-146b-3p	Rab43	RAB43, member RAS oncogene family
Details	73	66	mmu-miR-146b-3p	Ccdc127	coiled-coil domain containing 127
Details	74	66	mmu-miR-146b-3p	Bhlhe41	basic helix-loop-helix family, member e41
Details	75	66	mmu-miR-146b-3p	Tshz2	teashirt zinc finger family member 2
Details	76	65	mmu-miR-146b-3p	Slc5a6	solute carrier family 5 (sodium-dependent vitamin transporter), member 6
Details	77	65	mmu-miR-146b-3p	S100a3	S100 calcium binding protein A3
Details	78	65	mmu-miR-146b-3p	Zfp174	zinc finger protein 174
Details	79	65	mmu-miR-146b-3p	Hunk	hormonally upregulated Neu-associated kinase
Details	80	64	mmu-miR-146b-3p	Plxna2	plexin A2
Details	81	64	mmu-miR-146b-3p	Gad1	glutamate decarboxylase 1
Details	82	64	mmu-miR-146b-3p	Zhx2	zinc fingers and homeoboxes 2
Details	83	64	mmu-miR-146b-3p	Endod1	endonuclease domain containing 1
Details	84	64	mmu-miR-146b-3p	Ptgdr2	prostaglandin D2 receptor 2
Details	85	63	mmu-miR-146b-3p	Lrrcc1	leucine rich repeat and coiled-coil domain containing 1
Details	86	63	mmu-miR-146b-3p	Ncl	nucleolin
Details	87	62	mmu-miR-146b-3p	Zdhhc21	zinc finger, DHHC domain containing 21
Details	88	62	mmu-miR-146b-3p	Cx3cr1	chemokine (C-X3-C motif) receptor 1
Details	89	62	mmu-miR-146b-3p	Lrp12	low density lipoprotein-related protein 12
Details	90	62	mmu-miR-146b-3p	Nudt13	nudix (nucleoside diphosphate linked moiety X)-type motif 13
Details	91	62	mmu-miR-146b-3p	Ntn1	netrin 1
Details	92	62	mmu-miR-146b-3p	Sqstm1	sequestosome 1
Details	93	62	mmu-miR-146b-3p	Pip5k1a	phosphatidylinositol-4-phosphate 5-kinase, type 1 alpha
Details	94	61	mmu-miR-146b-3p	Zfp317	zinc finger protein 317
Details	95	60	mmu-miR-146b-3p	Ceacam12	carcinoembryonic antigen-related cell adhesion molecule 12
Details	96	60	mmu-miR-146b-3p	Cnp	2',3'-cyclic nucleotide 3' phosphodiesterase
Details	97	60	mmu-miR-146b-3p	Trim65	tripartite motif-containing 65
Details	98	60	mmu-miR-146b-3p	Banp	BTG3 associated nuclear protein
Details	99	60	mmu-miR-146b-3p	Prdm6	PR domain containing 6
Details	100	60	mmu-miR-146b-3p	Kctd11	potassium channel tetramerisation domain containing 11
Details	101	60	mmu-miR-146b-3p	Cdc42bpa	CDC42 binding protein kinase alpha
Details	102	60	mmu-miR-146b-3p	Zmym3	zinc finger, MYM-type 3
Details	103	59	mmu-miR-146b-3p	Acan	aggrecan
Details	104	59	mmu-miR-146b-3p	Tnfsf4	tumor necrosis factor (ligand) superfamily, member 4
Details	105	59	mmu-miR-146b-3p	Meltf	melanotransferrin
Details	106	59	mmu-miR-146b-3p	Gm6034	predicted gene 6034
Details	107	59	mmu-miR-146b-3p	Pramef17	PRAME family member 17
Details	108	59	mmu-miR-146b-3p	Gpr158	G protein-coupled receptor 158
Details	109	59	mmu-miR-146b-3p	Fam174b	family with sequence similarity 174, member B
Details	110	59	mmu-miR-146b-3p	Usp19	ubiquitin specific peptidase 19
Details	111	59	mmu-miR-146b-3p	Odc1	ornithine decarboxylase, structural 1
Details	112	59	mmu-miR-146b-3p	Lrp2	low density lipoprotein receptor-related protein 2
Details	113	59	mmu-miR-146b-3p	Tmem255a	transmembrane protein 255A
Details	114	59	mmu-miR-146b-3p	Bhlhe40	basic helix-loop-helix family, member e40
Details	115	59	mmu-miR-146b-3p	Rab2b	RAB2B, member RAS oncogene family
Details	116	59	mmu-miR-146b-3p	Gm13128	predicted gene 13128
Details	117	59	mmu-miR-146b-3p	Nos1ap	nitric oxide synthase 1 (neuronal) adaptor protein
Details	118	58	mmu-miR-146b-3p	Slc6a2	solute carrier family 6 (neurotransmitter transporter, noradrenalin), member 2
Details	119	58	mmu-miR-146b-3p	Kcns1	K+ voltage-gated channel, subfamily S, 1
Details	120	58	mmu-miR-146b-3p	Zbtb45	zinc finger and BTB domain containing 45
Details	121	58	mmu-miR-146b-3p	Sptlc2	serine palmitoyltransferase, long chain base subunit 2
Details	122	58	mmu-miR-146b-3p	Afdn	afadin, adherens junction formation factor
Details	123	58	mmu-miR-146b-3p	Ankrd55	ankyrin repeat domain 55
Details	124	58	mmu-miR-146b-3p	Galm	galactose mutarotase
Details	125	57	mmu-miR-146b-3p	Amer1	APC membrane recruitment 1
Details	126	57	mmu-miR-146b-3p	Pcdh19	protocadherin 19
Details	127	57	mmu-miR-146b-3p	Prkch	protein kinase C, eta
Details	128	57	mmu-miR-146b-3p	Ikbkg	inhibitor of kappaB kinase gamma
Details	129	57	mmu-miR-146b-3p	Vdr	vitamin D (1,25-dihydroxyvitamin D3) receptor
Details	130	57	mmu-miR-146b-3p	Slc5a3	solute carrier family 5 (inositol transporters), member 3
Details	131	57	mmu-miR-146b-3p	Grk2	G protein-coupled receptor kinase 2
Details	132	56	mmu-miR-146b-3p	Ip6k1	inositol hexaphosphate kinase 1
Details	133	56	mmu-miR-146b-3p	Pogk	pogo transposable element with KRAB domain
Details	134	56	mmu-miR-146b-3p	Alkbh5	alkB homolog 5, RNA demethylase
Details	135	56	mmu-miR-146b-3p	Emp1	epithelial membrane protein 1
Details	136	56	mmu-miR-146b-3p	Zcchc24	zinc finger, CCHC domain containing 24
Details	137	56	mmu-miR-146b-3p	Hmbs	hydroxymethylbilane synthase
Details	138	56	mmu-miR-146b-3p	Erc1	ELKS/RAB6-interacting/CAST family member 1
Details	139	56	mmu-miR-146b-3p	Mllt6	myeloid/lymphoid or mixed-lineage leukemia; translocated to, 6
Details	140	55	mmu-miR-146b-3p	Prrg3	proline rich Gla (G-carboxyglutamic acid) 3 (transmembrane)
Details	141	55	mmu-miR-146b-3p	Hrasls	HRAS-like suppressor
Details	142	55	mmu-miR-146b-3p	Tmem170b	transmembrane protein 170B
Details	143	55	mmu-miR-146b-3p	Ints2	integrator complex subunit 2
Details	144	55	mmu-miR-146b-3p	Arpp21	cyclic AMP-regulated phosphoprotein, 21
Details	145	55	mmu-miR-146b-3p	Cstf1	cleavage stimulation factor, 3' pre-RNA, subunit 1
Details	146	55	mmu-miR-146b-3p	Pigl	phosphatidylinositol glycan anchor biosynthesis, class L
Details	147	55	mmu-miR-146b-3p	Blnk	B cell linker
Details	148	55	mmu-miR-146b-3p	Cd244a	CD244 molecule A
Details	149	55	mmu-miR-146b-3p	Aar2	AAR2 splicing factor homolog
Details	150	54	mmu-miR-146b-3p	Cbx7	chromobox 7
Details	151	54	mmu-miR-146b-3p	Cacnb4	calcium channel, voltage-dependent, beta 4 subunit
Details	152	54	mmu-miR-146b-3p	Axin1	axin 1
Details	153	54	mmu-miR-146b-3p	Eda	ectodysplasin-A
Details	154	54	mmu-miR-146b-3p	Pea15a	phosphoprotein enriched in astrocytes 15A
Details	155	53	mmu-miR-146b-3p	Adgra2	adhesion G protein-coupled receptor A2
Details	156	53	mmu-miR-146b-3p	Zfp329	zinc finger protein 329
Details	157	53	mmu-miR-146b-3p	Tcn2	transcobalamin 2
Details	158	53	mmu-miR-146b-3p	Phyh	phytanoyl-CoA hydroxylase
Details	159	53	mmu-miR-146b-3p	Stxbp5	syntaxin binding protein 5 (tomosyn)
Details	160	53	mmu-miR-146b-3p	Nrbp2	nuclear receptor binding protein 2
Details	161	52	mmu-miR-146b-3p	Rnf222	ring finger protein 222
Details	162	52	mmu-miR-146b-3p	Utp14b	UTP14B small subunit processome component
Details	163	52	mmu-miR-146b-3p	Shprh	SNF2 histone linker PHD RING helicase
Details	164	52	mmu-miR-146b-3p	Hoxa11	homeobox A11
Details	165	52	mmu-miR-146b-3p	Zdhhc12	zinc finger, DHHC domain containing 12
Details	166	52	mmu-miR-146b-3p	Cyb561d1	cytochrome b-561 domain containing 1
Details	167	52	mmu-miR-146b-3p	Wdr81	WD repeat domain 81
Details	168	52	mmu-miR-146b-3p	Upk3bl	uroplakin 3B-like
Details	169	51	mmu-miR-146b-3p	Adcyap1r1	adenylate cyclase activating polypeptide 1 receptor 1
Details	170	51	mmu-miR-146b-3p	Plcb3	phospholipase C, beta 3
Details	171	51	mmu-miR-146b-3p	Gdi1	guanosine diphosphate (GDP) dissociation inhibitor 1
Details	172	51	mmu-miR-146b-3p	Serpine1	serine (or cysteine) peptidase inhibitor, clade E, member 1
Details	173	51	mmu-miR-146b-3p	Fam149a	family with sequence similarity 149, member A
Details	174	51	mmu-miR-146b-3p	Oaz2	ornithine decarboxylase antizyme 2
Details	175	51	mmu-miR-146b-3p	Vopp1	vesicular, overexpressed in cancer, prosurvival protein 1
Details	176	51	mmu-miR-146b-3p	Zfp385c	zinc finger protein 385C
Details	177	51	mmu-miR-146b-3p	Irf4	interferon regulatory factor 4
Details	178	50	mmu-miR-146b-3p	Vav2	vav 2 oncogene
Details	179	50	mmu-miR-146b-3p	Snx19	sorting nexin 19
Details	180	50	mmu-miR-146b-3p	Prx	periaxin
Details	1	100	mmu-miR-146b-5p	Traf6	TNF receptor-associated factor 6
Details	2	99	mmu-miR-146b-5p	Irak1	interleukin-1 receptor-associated kinase 1
Details	3	99	mmu-miR-146b-5p	Clasp1	CLIP associating protein 1
Details	4	98	mmu-miR-146b-5p	Esyt2	extended synaptotagmin-like protein 2
Details	5	97	mmu-miR-146b-5p	Numb	NUMB endocytic adaptor protein
Details	6	96	mmu-miR-146b-5p	Sec23ip	Sec23 interacting protein
Details	7	96	mmu-miR-146b-5p	Appl1	adaptor protein, phosphotyrosine interaction, PH domain and leucine zipper containing 1
Details	8	95	mmu-miR-146b-5p	Med1	mediator complex subunit 1
Details	9	95	mmu-miR-146b-5p	Kras	Kirsten rat sarcoma viral oncogene homolog
Details	10	94	mmu-miR-146b-5p	Gm813	predicted gene 813
Details	11	94	mmu-miR-146b-5p	Eif4g2	eukaryotic translation initiation factor 4, gamma 2
Details	12	94	mmu-miR-146b-5p	Rbm18	RNA binding motif protein 18
Details	13	94	mmu-miR-146b-5p	Rnls	renalase, FAD-dependent amine oxidase
Details	14	94	mmu-miR-146b-5p	Nova1	neuro-oncological ventral antigen 1
Details	15	94	mmu-miR-146b-5p	D030056L22Rik	RIKEN cDNA D030056L22 gene
Details	16	94	mmu-miR-146b-5p	Paqr5	progestin and adipoQ receptor family member V
Details	17	93	mmu-miR-146b-5p	Tdrkh	tudor and KH domain containing protein
Details	18	93	mmu-miR-146b-5p	Slc10a3	solute carrier family 10 (sodium/bile acid cotransporter family), member 3
Details	19	93	mmu-miR-146b-5p	Fbxw2	F-box and WD-40 domain protein 2
Details	20	92	mmu-miR-146b-5p	Eif5a2	eukaryotic translation initiation factor 5A2
Details	21	91	mmu-miR-146b-5p	Hmbox1	homeobox containing 1
Details	22	91	mmu-miR-146b-5p	Mri1	methylthioribose-1-phosphate isomerase 1
Details	23	91	mmu-miR-146b-5p	Sbspon	somatomedin B and thrombospondin, type 1 domain containing
Details	24	90	mmu-miR-146b-5p	Phc3	polyhomeotic 3
Details	25	90	mmu-miR-146b-5p	Hnrnpd	heterogeneous nuclear ribonucleoprotein D
Details	26	90	mmu-miR-146b-5p	Btg2	B cell translocation gene 2, anti-proliferative
Details	27	90	mmu-miR-146b-5p	Tmem120b	transmembrane protein 120B
Details	28	89	mmu-miR-146b-5p	Plscr4	phospholipid scramblase 4
Details	29	89	mmu-miR-146b-5p	B3gnt5	UDP-GlcNAc:betaGal beta-1,3-N-acetylglucosaminyltransferase 5
Details	30	89	mmu-miR-146b-5p	Tgm2	transglutaminase 2, C polypeptide
Details	31	89	mmu-miR-146b-5p	Bcorl1	BCL6 co-repressor-like 1
Details	32	89	mmu-miR-146b-5p	Mr1	major histocompatibility complex, class I-related
Details	33	89	mmu-miR-146b-5p	Hook3	hook microtubule tethering protein 3
Details	34	88	mmu-miR-146b-5p	Lsm11	U7 snRNP-specific Sm-like protein LSM11
Details	35	88	mmu-miR-146b-5p	Pls3	plastin 3 (T-isoform)
Details	36	88	mmu-miR-146b-5p	Hnrnpa2b1	heterogeneous nuclear ribonucleoprotein A2/B1
Details	37	88	mmu-miR-146b-5p	Hipk3	homeodomain interacting protein kinase 3
Details	38	88	mmu-miR-146b-5p	Cdc37l1	cell division cycle 37-like 1
Details	39	88	mmu-miR-146b-5p	Card10	caspase recruitment domain family, member 10
Details	40	88	mmu-miR-146b-5p	Dusp16	dual specificity phosphatase 16
Details	41	87	mmu-miR-146b-5p	Gm15140	predicted gene 15140
Details	42	87	mmu-miR-146b-5p	Mmp16	matrix metallopeptidase 16
Details	43	87	mmu-miR-146b-5p	Gm10057	predicted gene 10057
Details	44	87	mmu-miR-146b-5p	Fopnl	Fgfr1op N-terminal like
Details	45	87	mmu-miR-146b-5p	Samt1	spermatogenesis associated multipass transmembrane protein 1
Details	46	87	mmu-miR-146b-5p	4921511M17Rik	RIKEN cDNA 4921511M17 gene
Details	47	87	mmu-miR-146b-5p	Gm16445	predicted pseudogene 16445
Details	48	86	mmu-miR-146b-5p	Abl2	v-abl Abelson murine leukemia viral oncogene 2 (arg, Abelson-related gene)
Details	49	86	mmu-miR-146b-5p	Snx22	sorting nexin 22
Details	50	86	mmu-miR-146b-5p	Wdcp	WD repeat and coiled coil containing
Details	51	86	mmu-miR-146b-5p	Osbpl6	oxysterol binding protein-like 6
Details	52	86	mmu-miR-146b-5p	Rassf9	Ras association (RalGDS/AF-6) domain family (N-terminal) member 9
Details	53	86	mmu-miR-146b-5p	Sema3g	sema domain, immunoglobulin domain (Ig), short basic domain, secreted, (semaphorin) 3G
Details	54	86	mmu-miR-146b-5p	Elf1	E74-like factor 1
Details	55	86	mmu-miR-146b-5p	Golph3l	golgi phosphoprotein 3-like
Details	56	85	mmu-miR-146b-5p	Dcaf12	DDB1 and CUL4 associated factor 12
Details	57	85	mmu-miR-146b-5p	Ints2	integrator complex subunit 2
Details	58	85	mmu-miR-146b-5p	Flna	filamin, alpha
Details	59	84	mmu-miR-146b-5p	Tanc2	tetratricopeptide repeat, ankyrin repeat and coiled-coil containing 2
Details	60	84	mmu-miR-146b-5p	Cep170b	centrosomal protein 170B
Details	61	84	mmu-miR-146b-5p	Nfat5	nuclear factor of activated T cells 5
Details	62	84	mmu-miR-146b-5p	Zfyve1	zinc finger, FYVE domain containing 1
Details	63	84	mmu-miR-146b-5p	Gid8	GID complex subunit 8
Details	64	83	mmu-miR-146b-5p	Bend4	BEN domain containing 4
Details	65	83	mmu-miR-146b-5p	Prg4	proteoglycan 4 (megakaryocyte stimulating factor, articular superficial zone protein)
Details	66	83	mmu-miR-146b-5p	Uqcrq	ubiquinol-cytochrome c reductase, complex III subunit VII
Details	67	83	mmu-miR-146b-5p	Ino80d	INO80 complex subunit D
Details	68	83	mmu-miR-146b-5p	Slc38a5	solute carrier family 38, member 5
Details	69	83	mmu-miR-146b-5p	Slc46a2	solute carrier family 46, member 2
Details	70	83	mmu-miR-146b-5p	Sntn	sentan, cilia apical structure protein
Details	71	82	mmu-miR-146b-5p	Gatb	glutamyl-tRNA(Gln) amidotransferase, subunit B
Details	72	82	mmu-miR-146b-5p	P2ry1	purinergic receptor P2Y, G-protein coupled 1
Details	73	82	mmu-miR-146b-5p	Ptpra	protein tyrosine phosphatase, receptor type, A
Details	74	82	mmu-miR-146b-5p	Zfp532	zinc finger protein 532
Details	75	81	mmu-miR-146b-5p	Lrrtm2	leucine rich repeat transmembrane neuronal 2
Details	76	81	mmu-miR-146b-5p	Ccdc117	coiled-coil domain containing 117
Details	77	81	mmu-miR-146b-5p	Kdm2b	lysine (K)-specific demethylase 2B
Details	78	81	mmu-miR-146b-5p	C530008M17Rik	RIKEN cDNA C530008M17 gene
Details	79	81	mmu-miR-146b-5p	Vcan	versican
Details	80	81	mmu-miR-146b-5p	Slc20a1	solute carrier family 20, member 1
Details	81	81	mmu-miR-146b-5p	Wdfy4	WD repeat and FYVE domain containing 4
Details	82	81	mmu-miR-146b-5p	Erbb4	erb-b2 receptor tyrosine kinase 4
Details	83	80	mmu-miR-146b-5p	Stx2	syntaxin 2
Details	84	80	mmu-miR-146b-5p	Olfr212	olfactory receptor 212
Details	85	80	mmu-miR-146b-5p	Susd6	sushi domain containing 6
Details	86	80	mmu-miR-146b-5p	Zfp512b	zinc finger protein 512B
Details	87	80	mmu-miR-146b-5p	Olfm5	olfactomedin 5
Details	88	80	mmu-miR-146b-5p	Cnot6l	CCR4-NOT transcription complex, subunit 6-like
Details	89	80	mmu-miR-146b-5p	Nkiras1	NFKB inhibitor interacting Ras-like protein 1
Details	90	80	mmu-miR-146b-5p	Fign	fidgetin
Details	91	80	mmu-miR-146b-5p	1190002N15Rik	RIKEN cDNA 1190002N15 gene
Details	92	80	mmu-miR-146b-5p	Lrrc15	leucine rich repeat containing 15
Details	93	80	mmu-miR-146b-5p	Mtpap	mitochondrial poly(A) polymerase
Details	94	80	mmu-miR-146b-5p	Samd8	sterile alpha motif domain containing 8
Details	95	80	mmu-miR-146b-5p	Fgl2	fibrinogen-like protein 2
Details	96	79	mmu-miR-146b-5p	Elavl1	ELAV (embryonic lethal, abnormal vision)-like 1 (Hu antigen R)
Details	97	79	mmu-miR-146b-5p	Rer1	retention in endoplasmic reticulum sorting receptor 1
Details	98	79	mmu-miR-146b-5p	Rufy2	RUN and FYVE domain-containing 2
Details	99	79	mmu-miR-146b-5p	Gdnf	glial cell line derived neurotrophic factor
Details	100	79	mmu-miR-146b-5p	Siah2	siah E3 ubiquitin protein ligase 2
Details	101	79	mmu-miR-146b-5p	Ipcef1	interaction protein for cytohesin exchange factors 1
Details	102	79	mmu-miR-146b-5p	Map1b	microtubule-associated protein 1B
Details	103	79	mmu-miR-146b-5p	Mb21d2	Mab-21 domain containing 2
Details	104	79	mmu-miR-146b-5p	Sh3rf3	SH3 domain containing ring finger 3
Details	105	79	mmu-miR-146b-5p	Tmx4	thioredoxin-related transmembrane protein 4
Details	106	79	mmu-miR-146b-5p	1700021F05Rik	RIKEN cDNA 1700021F05 gene
Details	107	78	mmu-miR-146b-5p	Syt1	synaptotagmin I
Details	108	78	mmu-miR-146b-5p	Deptor	DEP domain containing MTOR-interacting protein
Details	109	78	mmu-miR-146b-5p	Parp1	poly (ADP-ribose) polymerase family, member 1
Details	110	78	mmu-miR-146b-5p	Rc3h1	RING CCCH (C3H) domains 1
Details	111	78	mmu-miR-146b-5p	Cnot6	CCR4-NOT transcription complex, subunit 6
Details	112	78	mmu-miR-146b-5p	Cp	ceruloplasmin
Details	113	78	mmu-miR-146b-5p	Slc12a6	solute carrier family 12, member 6
Details	114	78	mmu-miR-146b-5p	Ttyh1	tweety family member 1
Details	115	77	mmu-miR-146b-5p	Xaf1	XIAP associated factor 1
Details	116	77	mmu-miR-146b-5p	Ttc37	tetratricopeptide repeat domain 37
Details	117	77	mmu-miR-146b-5p	Ywhab	tyrosine 3-monooxygenase/tryptophan 5-monooxygenase activation protein, beta polypeptide
Details	118	77	mmu-miR-146b-5p	Hic2	hypermethylated in cancer 2
Details	119	77	mmu-miR-146b-5p	Ralgps2	Ral GEF with PH domain and SH3 binding motif 2
Details	120	77	mmu-miR-146b-5p	Krtap4-7	keratin associated protein 4-7
Details	121	77	mmu-miR-146b-5p	Zfp518a	zinc finger protein 518A
Details	122	76	mmu-miR-146b-5p	Tmem218	transmembrane protein 218
Details	123	76	mmu-miR-146b-5p	Hormad1	HORMA domain containing 1
Details	124	76	mmu-miR-146b-5p	Kctd9	potassium channel tetramerisation domain containing 9
Details	125	76	mmu-miR-146b-5p	Rbm33	RNA binding motif protein 33
Details	126	76	mmu-miR-146b-5p	Map3k8	mitogen-activated protein kinase kinase kinase 8
Details	127	75	mmu-miR-146b-5p	Homer2	homer scaffolding protein 2
Details	128	75	mmu-miR-146b-5p	Kcnk10	potassium channel, subfamily K, member 10
Details	129	75	mmu-miR-146b-5p	Bivm	basic, immunoglobulin-like variable motif containing
Details	130	75	mmu-miR-146b-5p	Gmps	guanine monophosphate synthetase
Details	131	75	mmu-miR-146b-5p	Gab3	growth factor receptor bound protein 2-associated protein 3
Details	132	75	mmu-miR-146b-5p	Syt11	synaptotagmin XI
Details	133	75	mmu-miR-146b-5p	Amotl2	angiomotin-like 2
Details	134	75	mmu-miR-146b-5p	Rarb	retinoic acid receptor, beta
Details	135	75	mmu-miR-146b-5p	Taf9b	TATA-box binding protein associated factor 9B
Details	136	75	mmu-miR-146b-5p	Met	met proto-oncogene
Details	137	74	mmu-miR-146b-5p	Braf	Braf transforming gene
Details	138	74	mmu-miR-146b-5p	Zfp444	zinc finger protein 444
Details	139	74	mmu-miR-146b-5p	Srd5a1	steroid 5 alpha-reductase 1
Details	140	74	mmu-miR-146b-5p	Creb1	cAMP responsive element binding protein 1
Details	141	74	mmu-miR-146b-5p	Cpxm2	carboxypeptidase X 2 (M14 family)
Details	142	74	mmu-miR-146b-5p	Bcl2l13	BCL2-like 13 (apoptosis facilitator)
Details	143	74	mmu-miR-146b-5p	Nbas	neuroblastoma amplified sequence
Details	144	73	mmu-miR-146b-5p	Slc1a2	solute carrier family 1 (glial high affinity glutamate transporter), member 2
Details	145	73	mmu-miR-146b-5p	Znrf3	zinc and ring finger 3
Details	146	73	mmu-miR-146b-5p	Naa50	N(alpha)-acetyltransferase 50, NatE catalytic subunit
Details	147	73	mmu-miR-146b-5p	Hey2	hairy/enhancer-of-split related with YRPW motif 2
Details	148	73	mmu-miR-146b-5p	Yipf7	Yip1 domain family, member 7
Details	149	73	mmu-miR-146b-5p	Prpf38a	PRP38 pre-mRNA processing factor 38 (yeast) domain containing A
Details	150	73	mmu-miR-146b-5p	Zdhhc3	zinc finger, DHHC domain containing 3
Details	151	73	mmu-miR-146b-5p	Alx4	aristaless-like homeobox 4
Details	152	73	mmu-miR-146b-5p	Dzank1	double zinc ribbon and ankyrin repeat domains 1
Details	153	73	mmu-miR-146b-5p	Bcl11a	B cell CLL/lymphoma 11A (zinc finger protein)
Details	154	73	mmu-miR-146b-5p	Ndufaf5	NADH:ubiquinone oxidoreductase complex assembly factor 5
Details	155	73	mmu-miR-146b-5p	Ndor1	NADPH dependent diflavin oxidoreductase 1
Details	156	73	mmu-miR-146b-5p	Hspa13	heat shock protein 70 family, member 13
Details	157	73	mmu-miR-146b-5p	Dnase2b	deoxyribonuclease II beta
Details	158	73	mmu-miR-146b-5p	Robo1	roundabout guidance receptor 1
Details	159	73	mmu-miR-146b-5p	Mlf2	myeloid leukemia factor 2
Details	160	73	mmu-miR-146b-5p	Sgcb	sarcoglycan, beta (dystrophin-associated glycoprotein)
Details	161	72	mmu-miR-146b-5p	Tasp1	taspase, threonine aspartase 1
Details	162	72	mmu-miR-146b-5p	Cdh5	cadherin 5
Details	163	72	mmu-miR-146b-5p	Cpd	carboxypeptidase D
Details	164	72	mmu-miR-146b-5p	Ppm1h	protein phosphatase 1H (PP2C domain containing)
Details	165	72	mmu-miR-146b-5p	Fmo1	flavin containing monooxygenase 1
Details	166	72	mmu-miR-146b-5p	Syn3	synapsin III
Details	167	72	mmu-miR-146b-5p	Anxa4	annexin A4
Details	168	71	mmu-miR-146b-5p	2610044O15Rik8	RIKEN cDNA 2610044O15 gene
Details	169	71	mmu-miR-146b-5p	Zfp367	zinc finger protein 367
Details	170	71	mmu-miR-146b-5p	Zfp94	zinc finger protein 94
Details	171	71	mmu-miR-146b-5p	Dip2a	disco interacting protein 2 homolog A
Details	172	71	mmu-miR-146b-5p	Zfp870	zinc finger protein 870
Details	173	71	mmu-miR-146b-5p	Brd9	bromodomain containing 9
Details	174	71	mmu-miR-146b-5p	Srsf6	serine/arginine-rich splicing factor 6
Details	175	71	mmu-miR-146b-5p	Rnf169	ring finger protein 169
Details	176	71	mmu-miR-146b-5p	Notch1	notch 1
Details	177	71	mmu-miR-146b-5p	Adarb1	adenosine deaminase, RNA-specific, B1
Details	178	70	mmu-miR-146b-5p	Pphln1	periphilin 1
Details	179	70	mmu-miR-146b-5p	Camta1	calmodulin binding transcription activator 1
Details	180	70	mmu-miR-146b-5p	Asb4	ankyrin repeat and SOCS box-containing 4
Details	181	70	mmu-miR-146b-5p	Zbtb25	zinc finger and BTB domain containing 25
Details	182	70	mmu-miR-146b-5p	Baiap2l1	BAI1-associated protein 2-like 1
Details	183	70	mmu-miR-146b-5p	Nebl	nebulette
Details	184	70	mmu-miR-146b-5p	Ctdspl2	CTD (carboxy-terminal domain, RNA polymerase II, polypeptide A) small phosphatase like 2
Details	185	70	mmu-miR-146b-5p	Klhl42	kelch-like 42
Details	186	70	mmu-miR-146b-5p	Tmem45a2	transmembrane protein 45A2
Details	187	70	mmu-miR-146b-5p	Zdhhc17	zinc finger, DHHC domain containing 17
Details	188	70	mmu-miR-146b-5p	Rnf26	ring finger protein 26
Details	189	69	mmu-miR-146b-5p	Cdk5	cyclin-dependent kinase 5
Details	190	69	mmu-miR-146b-5p	Samd7	sterile alpha motif domain containing 7
Details	191	69	mmu-miR-146b-5p	Serpina3k	serine (or cysteine) peptidase inhibitor, clade A, member 3K
Details	192	69	mmu-miR-146b-5p	Magi3	membrane associated guanylate kinase, WW and PDZ domain containing 3
Details	193	69	mmu-miR-146b-5p	Prx	periaxin
Details	194	69	mmu-miR-146b-5p	Mcfd2	multiple coagulation factor deficiency 2
Details	195	69	mmu-miR-146b-5p	Trpc1	transient receptor potential cation channel, subfamily C, member 1
Details	196	68	mmu-miR-146b-5p	Myt1	myelin transcription factor 1
Details	197	68	mmu-miR-146b-5p	Trim2	tripartite motif-containing 2
Details	198	68	mmu-miR-146b-5p	Ror1	receptor tyrosine kinase-like orphan receptor 1
Details	199	68	mmu-miR-146b-5p	Cdh3	cadherin 3
Details	200	68	mmu-miR-146b-5p	Them6	thioesterase superfamily member 6
Details	201	68	mmu-miR-146b-5p	Ccn4	cellular communication network factor 4
Details	202	68	mmu-miR-146b-5p	Gdap2	ganglioside-induced differentiation-associated-protein 2
Details	203	68	mmu-miR-146b-5p	Prrx1	paired related homeobox 1
Details	204	68	mmu-miR-146b-5p	Kctd15	potassium channel tetramerisation domain containing 15
Details	205	68	mmu-miR-146b-5p	Usp3	ubiquitin specific peptidase 3
Details	206	68	mmu-miR-146b-5p	Abcf3	ATP-binding cassette, sub-family F (GCN20), member 3
Details	207	68	mmu-miR-146b-5p	Cggbp1	CGG triplet repeat binding protein 1
Details	208	67	mmu-miR-146b-5p	Mamstr	MEF2 activating motif and SAP domain containing transcriptional regulator
Details	209	67	mmu-miR-146b-5p	Anapc1	anaphase promoting complex subunit 1
Details	210	67	mmu-miR-146b-5p	Apmap	adipocyte plasma membrane associated protein
Details	211	67	mmu-miR-146b-5p	Specc1	sperm antigen with calponin homology and coiled-coil domains 1
Details	212	67	mmu-miR-146b-5p	Mfsd4b1	major facilitator superfamily domain containing 4B1
Details	213	67	mmu-miR-146b-5p	Cxxc4	CXXC finger 4
Details	214	67	mmu-miR-146b-5p	Ssr1	signal sequence receptor, alpha
Details	215	66	mmu-miR-146b-5p	Tln2	talin 2
Details	216	66	mmu-miR-146b-5p	Rnf130	ring finger protein 130
Details	217	66	mmu-miR-146b-5p	Padi2	peptidyl arginine deiminase, type II
Details	218	66	mmu-miR-146b-5p	Zfp952	zinc finger protein 952
Details	219	66	mmu-miR-146b-5p	Sort1	sortilin 1
Details	220	66	mmu-miR-146b-5p	Ank2	ankyrin 2, brain
Details	221	66	mmu-miR-146b-5p	Gm5111	predicted gene 5111
Details	223	66	mmu-miR-146b-5p	Scfd1	Sec1 family domain containing 1
Details	224	66	mmu-miR-146b-5p	Zfp39	zinc finger protein 39
Details	225	66	mmu-miR-146b-5p	Nup35	nucleoporin 35
Details	226	66	mmu-miR-146b-5p	Dio2	deiodinase, iodothyronine, type II
Details	227	66	mmu-miR-146b-5p	Cnot9	CCR4-NOT transcription complex, subunit 9
Details	228	66	mmu-miR-146b-5p	Axl	AXL receptor tyrosine kinase
Details	229	66	mmu-miR-146b-5p	Dazap2	DAZ associated protein 2
Details	230	66	mmu-miR-146b-5p	Pitpnm2	phosphatidylinositol transfer protein, membrane-associated 2
Details	231	65	mmu-miR-146b-5p	Ablim1	actin-binding LIM protein 1
Details	232	65	mmu-miR-146b-5p	Ascl4	achaete-scute family bHLH transcription factor 4
Details	233	65	mmu-miR-146b-5p	Clasp2	CLIP associating protein 2
Details	234	65	mmu-miR-146b-5p	Ppp3r2	protein phosphatase 3, regulatory subunit B, alpha isoform (calcineurin B, type II)
Details	235	65	mmu-miR-146b-5p	Arcn1	archain 1
Details	236	65	mmu-miR-146b-5p	Rnmt	RNA (guanine-7-) methyltransferase
Details	237	65	mmu-miR-146b-5p	Gimap4	GTPase, IMAP family member 4
Details	238	65	mmu-miR-146b-5p	Thrb	thyroid hormone receptor beta
Details	239	65	mmu-miR-146b-5p	4930524B15Rik	RIKEN cDNA 4930524B15 gene
Details	240	65	mmu-miR-146b-5p	Kcnrg	potassium channel regulator
Details	241	65	mmu-miR-146b-5p	Psmd3	proteasome (prosome, macropain) 26S subunit, non-ATPase, 3
Details	242	65	mmu-miR-146b-5p	Tcf4	transcription factor 4
Details	243	64	mmu-miR-146b-5p	Ppp1r11	protein phosphatase 1, regulatory inhibitor subunit 11
Details	244	64	mmu-miR-146b-5p	Btf3l4	basic transcription factor 3-like 4
Details	245	64	mmu-miR-146b-5p	G2e3	G2/M-phase specific E3 ubiquitin ligase
Details	246	64	mmu-miR-146b-5p	Polr2d	polymerase (RNA) II (DNA directed) polypeptide D
Details	247	64	mmu-miR-146b-5p	Sass6	SAS-6 centriolar assembly protein
Details	248	64	mmu-miR-146b-5p	Abca5	ATP-binding cassette, sub-family A (ABC1), member 5
Details	249	64	mmu-miR-146b-5p	Smyd1	SET and MYND domain containing 1
Details	250	64	mmu-miR-146b-5p	Btg1	B cell translocation gene 1, anti-proliferative
Details	251	64	mmu-miR-146b-5p	Zfp748	zinc finger protein 748
Details	252	64	mmu-miR-146b-5p	Vasn	vasorin
Details	253	64	mmu-miR-146b-5p	Prpf19	pre-mRNA processing factor 19
Details	254	64	mmu-miR-146b-5p	H2-Q1	histocompatibility 2, Q region locus 1
Details	255	64	mmu-miR-146b-5p	Macc1	metastasis associated in colon cancer 1
Details	256	63	mmu-miR-146b-5p	Eddm3b	epididymal protein 3B
Details	257	63	mmu-miR-146b-5p	Cyp11b1	cytochrome P450, family 11, subfamily b, polypeptide 1
Details	258	63	mmu-miR-146b-5p	Dot1l	DOT1-like, histone H3 methyltransferase (S. cerevisiae)
Details	259	63	mmu-miR-146b-5p	Ubxn7	UBX domain protein 7
Details	260	63	mmu-miR-146b-5p	Stxbp1	syntaxin binding protein 1
Details	261	63	mmu-miR-146b-5p	Kcnj10	potassium inwardly-rectifying channel, subfamily J, member 10
Details	262	63	mmu-miR-146b-5p	Tnrc6b	trinucleotide repeat containing 6b
Details	263	63	mmu-miR-146b-5p	Tbc1d9	TBC1 domain family, member 9
Details	264	63	mmu-miR-146b-5p	Gria3	glutamate receptor, ionotropic, AMPA3 (alpha 3)
Details	265	63	mmu-miR-146b-5p	Cnnm4	cyclin M4
Details	266	62	mmu-miR-146b-5p	Samd10	sterile alpha motif domain containing 10
Details	267	62	mmu-miR-146b-5p	Heca	hdc homolog, cell cycle regulator
Details	268	62	mmu-miR-146b-5p	Rbl1	RB transcriptional corepressor like 1
Details	269	62	mmu-miR-146b-5p	Slc22a3	solute carrier family 22 (organic cation transporter), member 3
Details	270	62	mmu-miR-146b-5p	Slc7a4	solute carrier family 7 (cationic amino acid transporter, y+ system), member 4
Details	271	62	mmu-miR-146b-5p	F2	coagulation factor II
Details	272	62	mmu-miR-146b-5p	Tacstd2	tumor-associated calcium signal transducer 2
Details	273	62	mmu-miR-146b-5p	Zfp955b	zinc finger protein 955B
Details	274	62	mmu-miR-146b-5p	Strbp	spermatid perinuclear RNA binding protein
Details	275	62	mmu-miR-146b-5p	Slc5a3	solute carrier family 5 (inositol transporters), member 3
Details	276	62	mmu-miR-146b-5p	Zyx	zyxin
Details	277	62	mmu-miR-146b-5p	Shq1	SHQ1 homolog (S. cerevisiae)
Details	278	62	mmu-miR-146b-5p	Rps15a	ribosomal protein S15A
Details	279	62	mmu-miR-146b-5p	Gm21119	predicted gene, 21119
Details	280	61	mmu-miR-146b-5p	Gpx6	glutathione peroxidase 6
Details	281	61	mmu-miR-146b-5p	Senp6	SUMO/sentrin specific peptidase 6
Details	282	61	mmu-miR-146b-5p	Enpp6	ectonucleotide pyrophosphatase/phosphodiesterase 6
Details	283	61	mmu-miR-146b-5p	Esrrb	estrogen related receptor, beta
Details	284	61	mmu-miR-146b-5p	Svs6	seminal vesicle secretory protein 6
Details	285	61	mmu-miR-146b-5p	Zfp286	zinc finger protein 286
Details	286	61	mmu-miR-146b-5p	Btaf1	B-TFIID TATA-box binding protein associated factor 1
Details	287	61	mmu-miR-146b-5p	Leprotl1	leptin receptor overlapping transcript-like 1
Details	288	61	mmu-miR-146b-5p	Sgo2a	shugoshin 2A
Details	289	61	mmu-miR-146b-5p	Cdh12	cadherin 12
Details	290	61	mmu-miR-146b-5p	Ift140	intraflagellar transport 140
Details	291	61	mmu-miR-146b-5p	Zxdb	zinc finger, X-linked, duplicated B
Details	292	61	mmu-miR-146b-5p	Vapb	vesicle-associated membrane protein, associated protein B and C
Details	293	61	mmu-miR-146b-5p	Plek	pleckstrin
Details	294	60	mmu-miR-146b-5p	Hoxa5	homeobox A5
Details	295	60	mmu-miR-146b-5p	Zfp236	zinc finger protein 236
Details	296	60	mmu-miR-146b-5p	Lss	lanosterol synthase
Details	297	60	mmu-miR-146b-5p	Tmem154	transmembrane protein 154
Details	298	60	mmu-miR-146b-5p	Cemip	cell migration inducing protein, hyaluronan binding
Details	299	60	mmu-miR-146b-5p	Ramp1	receptor (calcitonin) activity modifying protein 1
Details	300	60	mmu-miR-146b-5p	Fam84a	family with sequence similarity 84, member A
Details	301	60	mmu-miR-146b-5p	Fam210b	family with sequence similarity 210, member B
Details	302	60	mmu-miR-146b-5p	Midn	midnolin
Details	303	60	mmu-miR-146b-5p	Cst10	cystatin 10 (chondrocytes)
Details	304	60	mmu-miR-146b-5p	Dcx	doublecortin
Details	305	60	mmu-miR-146b-5p	Vps13b	vacuolar protein sorting 13B
Details	306	60	mmu-miR-146b-5p	Zfp955a	zinc finger protein 955A
Details	307	60	mmu-miR-146b-5p	Sub1	SUB1 homolog (S. cerevisiae)
Details	308	60	mmu-miR-146b-5p	4930402K13Rik	RIKEN cDNA 4930402K13 gene
Details	309	59	mmu-miR-146b-5p	Fstl3	follistatin-like 3
Details	310	59	mmu-miR-146b-5p	Nudt13	nudix (nucleoside diphosphate linked moiety X)-type motif 13
Details	311	59	mmu-miR-146b-5p	Ptrh2	peptidyl-tRNA hydrolase 2
Details	312	59	mmu-miR-146b-5p	Zfp7	zinc finger protein 7
Details	313	59	mmu-miR-146b-5p	Slamf1	signaling lymphocytic activation molecule family member 1
Details	314	59	mmu-miR-146b-5p	Tmx3	thioredoxin-related transmembrane protein 3
Details	315	59	mmu-miR-146b-5p	Brwd1	bromodomain and WD repeat domain containing 1
Details	316	59	mmu-miR-146b-5p	Defb20	defensin beta 20
Details	317	59	mmu-miR-146b-5p	Dcaf7	DDB1 and CUL4 associated factor 7
Details	318	59	mmu-miR-146b-5p	Defb29	defensin beta 29
Details	319	59	mmu-miR-146b-5p	Fam219a	family with sequence similarity 219, member A
Details	320	59	mmu-miR-146b-5p	Ece1	endothelin converting enzyme 1
Details	321	58	mmu-miR-146b-5p	Zfp811	zinc finger protein 811
Details	322	58	mmu-miR-146b-5p	Adam22	a disintegrin and metallopeptidase domain 22
Details	323	58	mmu-miR-146b-5p	Samd12	sterile alpha motif domain containing 12
Details	324	58	mmu-miR-146b-5p	Gm14085	predicted gene 14085
Details	325	58	mmu-miR-146b-5p	Teddm1b	transmembrane epididymal protein 1B
Details	326	58	mmu-miR-146b-5p	Slc28a2	solute carrier family 28 (sodium-coupled nucleoside transporter), member 2
Details	327	58	mmu-miR-146b-5p	Cmtm2a	CKLF-like MARVEL transmembrane domain containing 2A
Details	328	58	mmu-miR-146b-5p	Ppm1k	protein phosphatase 1K (PP2C domain containing)
Details	329	58	mmu-miR-146b-5p	Lrrc75b	leucine rich repeat containing 75B
Details	330	58	mmu-miR-146b-5p	Irf6	interferon regulatory factor 6
Details	331	58	mmu-miR-146b-5p	Cd86	CD86 antigen
Details	332	58	mmu-miR-146b-5p	Cntfr	ciliary neurotrophic factor receptor
Details	333	58	mmu-miR-146b-5p	Col4a3	collagen, type IV, alpha 3
Details	334	58	mmu-miR-146b-5p	Hipk1	homeodomain interacting protein kinase 1
Details	335	58	mmu-miR-146b-5p	Olfr920	olfactory receptor 920
Details	336	58	mmu-miR-146b-5p	Fam234b	family with sequence similarity 234, member B
Details	337	58	mmu-miR-146b-5p	Itga8	integrin alpha 8
Details	338	58	mmu-miR-146b-5p	Slc23a2	solute carrier family 23 (nucleobase transporters), member 2
Details	339	58	mmu-miR-146b-5p	Shisal1	shisa like 1
Details	340	58	mmu-miR-146b-5p	Rfc1	replication factor C (activator 1) 1
Details	341	57	mmu-miR-146b-5p	Ntng1	netrin G1
Details	342	57	mmu-miR-146b-5p	Serinc1	serine incorporator 1
Details	343	57	mmu-miR-146b-5p	Ispd	isoprenoid synthase domain containing
Details	344	57	mmu-miR-146b-5p	Purb	purine rich element binding protein B
Details	345	57	mmu-miR-146b-5p	Rtraf	RNA transcription, translation and transport factor
Details	346	57	mmu-miR-146b-5p	C330007P06Rik	RIKEN cDNA C330007P06 gene
Details	347	57	mmu-miR-146b-5p	Ms4a2	membrane-spanning 4-domains, subfamily A, member 2
Details	348	57	mmu-miR-146b-5p	Tmem242	transmembrane protein 242
Details	349	57	mmu-miR-146b-5p	Sae1	SUMO1 activating enzyme subunit 1
Details	350	57	mmu-miR-146b-5p	Nmu	neuromedin U
Details	351	57	mmu-miR-146b-5p	Reln	reelin
Details	352	56	mmu-miR-146b-5p	Itm2b	integral membrane protein 2B
Details	353	56	mmu-miR-146b-5p	Tgm3	transglutaminase 3, E polypeptide
Details	354	56	mmu-miR-146b-5p	Cecr2	CECR2, histone acetyl-lysine reader
Details	355	56	mmu-miR-146b-5p	Tfdp2	transcription factor Dp 2
Details	356	56	mmu-miR-146b-5p	Caprin2	caprin family member 2
Details	357	56	mmu-miR-146b-5p	Dock8	dedicator of cytokinesis 8
Details	358	56	mmu-miR-146b-5p	Timm29	translocase of inner mitochondrial membrane 29
Details	359	56	mmu-miR-146b-5p	Nsd1	nuclear receptor-binding SET-domain protein 1
Details	360	56	mmu-miR-146b-5p	Chuk	conserved helix-loop-helix ubiquitous kinase
Details	361	56	mmu-miR-146b-5p	Mgat1	mannoside acetylglucosaminyltransferase 1
Details	362	56	mmu-miR-146b-5p	Fbxo45	F-box protein 45
Details	363	56	mmu-miR-146b-5p	Ogfod1	2-oxoglutarate and iron-dependent oxygenase domain containing 1
Details	364	56	mmu-miR-146b-5p	Scai	suppressor of cancer cell invasion
Details	365	56	mmu-miR-146b-5p	Fam210a	family with sequence similarity 210, member A
Details	366	56	mmu-miR-146b-5p	Olfml1	olfactomedin-like 1
Details	367	55	mmu-miR-146b-5p	Retreg3	reticulophagy regulator family member 3
Details	368	55	mmu-miR-146b-5p	Terb2	telomere repeat binding bouquet formation protein 2
Details	369	55	mmu-miR-146b-5p	Dusp18	dual specificity phosphatase 18
Details	370	55	mmu-miR-146b-5p	Stx3	syntaxin 3
Details	371	55	mmu-miR-146b-5p	Pknox1	Pbx/knotted 1 homeobox
Details	372	55	mmu-miR-146b-5p	Sfxn1	sideroflexin 1
Details	373	55	mmu-miR-146b-5p	Cd4	CD4 antigen
Details	374	55	mmu-miR-146b-5p	Gm5127	predicted gene 5127
Details	375	55	mmu-miR-146b-5p	Pcdh1	protocadherin 1
Details	376	55	mmu-miR-146b-5p	Vwf	Von Willebrand factor
Details	377	55	mmu-miR-146b-5p	Nyap2	neuronal tyrosine-phophorylated phosphoinositide 3-kinase adaptor 2
Details	378	55	mmu-miR-146b-5p	Msh5	mutS homolog 5
Details	379	55	mmu-miR-146b-5p	Prr9	proline rich 9
Details	380	55	mmu-miR-146b-5p	Zfp111	zinc finger protein 111
Details	381	55	mmu-miR-146b-5p	Pdlim5	PDZ and LIM domain 5
Details	382	55	mmu-miR-146b-5p	Phox2b	paired-like homeobox 2b
Details	383	55	mmu-miR-146b-5p	Sec61a2	Sec61, alpha subunit 2 (S. cerevisiae)
Details	384	55	mmu-miR-146b-5p	Gemin7	gem nuclear organelle associated protein 7
Details	385	55	mmu-miR-146b-5p	Thumpd1	THUMP domain containing 1
Details	386	55	mmu-miR-146b-5p	Ptprb	protein tyrosine phosphatase, receptor type, B
Details	387	55	mmu-miR-146b-5p	Rbpms2	RNA binding protein with multiple splicing 2
Details	388	55	mmu-miR-146b-5p	Dph1	diphthamide biosynthesis 1
Details	389	55	mmu-miR-146b-5p	Usf3	upstream transcription factor family member 3
Details	390	54	mmu-miR-146b-5p	Cln6	ceroid-lipofuscinosis, neuronal 6
Details	391	54	mmu-miR-146b-5p	Riok2	RIO kinase 2
Details	392	54	mmu-miR-146b-5p	Tmem216	transmembrane protein 216
Details	393	54	mmu-miR-146b-5p	Dynll1	dynein light chain LC8-type 1
Details	394	54	mmu-miR-146b-5p	Vps13d	vacuolar protein sorting 13D
Details	395	54	mmu-miR-146b-5p	Tceanc2	transcription elongation factor A (SII) N-terminal and central domain containing 2
Details	396	54	mmu-miR-146b-5p	Lipa	lysosomal acid lipase A
Details	397	54	mmu-miR-146b-5p	Slc37a3	solute carrier family 37 (glycerol-3-phosphate transporter), member 3
Details	398	54	mmu-miR-146b-5p	Zadh2	zinc binding alcohol dehydrogenase, domain containing 2
Details	399	54	mmu-miR-146b-5p	Mfsd4b5	major facilitator superfamily domain containing 4B5
Details	400	54	mmu-miR-146b-5p	Enpp4	ectonucleotide pyrophosphatase/phosphodiesterase 4
Details	401	54	mmu-miR-146b-5p	Otud7b	OTU domain containing 7B
Details	402	54	mmu-miR-146b-5p	Ido2	indoleamine 2,3-dioxygenase 2
Details	403	54	mmu-miR-146b-5p	Ripor2	RHO family interacting cell polarization regulator 2
Details	404	54	mmu-miR-146b-5p	Dstn	destrin
Details	405	53	mmu-miR-146b-5p	Sowahc	sosondowah ankyrin repeat domain family member C
Details	406	53	mmu-miR-146b-5p	Fam107b	family with sequence similarity 107, member B
Details	407	53	mmu-miR-146b-5p	A1cf	APOBEC1 complementation factor
Details	408	53	mmu-miR-146b-5p	Mtif3	mitochondrial translational initiation factor 3
Details	409	53	mmu-miR-146b-5p	Pogk	pogo transposable element with KRAB domain
Details	410	53	mmu-miR-146b-5p	Ola1	Obg-like ATPase 1
Details	411	53	mmu-miR-146b-5p	Mosmo	modulator of smoothened
Details	412	53	mmu-miR-146b-5p	Ttbk2	tau tubulin kinase 2
Details	413	53	mmu-miR-146b-5p	Itga4	integrin alpha 4
Details	414	53	mmu-miR-146b-5p	Hcrtr2	hypocretin (orexin) receptor 2
Details	415	53	mmu-miR-146b-5p	Ar	androgen receptor
Details	416	53	mmu-miR-146b-5p	Prom1	prominin 1
Details	417	53	mmu-miR-146b-5p	Zfp938	zinc finger protein 938
Details	418	53	mmu-miR-146b-5p	Zfat	zinc finger and AT hook domain containing
Details	419	53	mmu-miR-146b-5p	Irak2	interleukin-1 receptor-associated kinase 2
Details	420	53	mmu-miR-146b-5p	Megf10	multiple EGF-like-domains 10
Details	421	53	mmu-miR-146b-5p	Isoc1	isochorismatase domain containing 1
Details	422	53	mmu-miR-146b-5p	Gstm2	glutathione S-transferase, mu 2
Details	423	53	mmu-miR-146b-5p	Rfx7	regulatory factor X, 7
Details	424	52	mmu-miR-146b-5p	Ovca2	candidate tumor suppressor in ovarian cancer 2
Details	425	52	mmu-miR-146b-5p	Lpar2	lysophosphatidic acid receptor 2
Details	426	52	mmu-miR-146b-5p	Tmod2	tropomodulin 2
Details	427	52	mmu-miR-146b-5p	Lyrm4	LYR motif containing 4
Details	428	52	mmu-miR-146b-5p	Slc38a1	solute carrier family 38, member 1
Details	429	52	mmu-miR-146b-5p	Arl8a	ADP-ribosylation factor-like 8A
Details	430	52	mmu-miR-146b-5p	Gpr21	G protein-coupled receptor 21
Details	431	52	mmu-miR-146b-5p	Wnt1	wingless-type MMTV integration site family, member 1
Details	432	52	mmu-miR-146b-5p	Klhl31	kelch-like 31
Details	433	52	mmu-miR-146b-5p	Armc8	armadillo repeat containing 8
Details	434	52	mmu-miR-146b-5p	Ago1	argonaute RISC catalytic subunit 1
Details	435	52	mmu-miR-146b-5p	Jazf1	JAZF zinc finger 1
Details	436	52	mmu-miR-146b-5p	Gm21319	predicted gene, 21319
Details	437	52	mmu-miR-146b-5p	Lin7a	lin-7 homolog A (C. elegans)
Details	438	52	mmu-miR-146b-5p	2410141K09Rik	RIKEN cDNA 2410141K09 gene
Details	439	52	mmu-miR-146b-5p	Snap23	synaptosomal-associated protein 23
Details	440	52	mmu-miR-146b-5p	Star	steroidogenic acute regulatory protein
Details	441	52	mmu-miR-146b-5p	Arih1	ariadne RBR E3 ubiquitin protein ligase 1
Details	442	52	mmu-miR-146b-5p	A3galt2	alpha 1,3-galactosyltransferase 2 (isoglobotriaosylceramide synthase)
Details	443	51	mmu-miR-146b-5p	Gpr157	G protein-coupled receptor 157
Details	444	51	mmu-miR-146b-5p	Dynap	dynactin associated protein
Details	445	51	mmu-miR-146b-5p	Bahcc1	BAH domain and coiled-coil containing 1
Details	446	51	mmu-miR-146b-5p	Gdf5	growth differentiation factor 5
Details	447	51	mmu-miR-146b-5p	Avl9	AVL9 cell migration associated
Details	448	51	mmu-miR-146b-5p	Fbxo38	F-box protein 38
Details	449	51	mmu-miR-146b-5p	Impa1	inositol (myo)-1(or 4)-monophosphatase 1
Details	450	51	mmu-miR-146b-5p	Ptpn14	protein tyrosine phosphatase, non-receptor type 14
Details	451	51	mmu-miR-146b-5p	Drp2	dystrophin related protein 2
Details	452	51	mmu-miR-146b-5p	Fosl2	fos-like antigen 2
Details	453	51	mmu-miR-146b-5p	Fuk	fucokinase
Details	454	51	mmu-miR-146b-5p	Tardbp	TAR DNA binding protein
Details	455	51	mmu-miR-146b-5p	Pitpna	phosphatidylinositol transfer protein, alpha
Details	456	51	mmu-miR-146b-5p	Hif3a	hypoxia inducible factor 3, alpha subunit
Details	457	50	mmu-miR-146b-5p	Set	SET nuclear oncogene
Details	458	50	mmu-miR-146b-5p	Ezr	ezrin
Details	459	50	mmu-miR-146b-5p	Ceacam2	carcinoembryonic antigen-related cell adhesion molecule 2
Details	460	50	mmu-miR-146b-5p	Poldip3	polymerase (DNA-directed), delta interacting protein 3
Details	461	50	mmu-miR-146b-5p	Dmrtc1b	DMRT-like family C1b
Details	462	50	mmu-miR-146b-5p	Gclc	glutamate-cysteine ligase, catalytic subunit
Details	463	50	mmu-miR-146b-5p	B3galt2	UDP-Gal:betaGlcNAc beta 1,3-galactosyltransferase, polypeptide 2
Details	464	50	mmu-miR-146b-5p	Kcnc2	potassium voltage gated channel, Shaw-related subfamily, member 2
Details	465	50	mmu-miR-146b-5p	E130308A19Rik	RIKEN cDNA E130308A19 gene
Details	466	50	mmu-miR-146b-5p	Nptn	neuroplastin
Details	467	50	mmu-miR-146b-5p	Cyp2c69	cytochrome P450, family 2, subfamily c, polypeptide 69
Details	468	50	mmu-miR-146b-5p	Slc47a1	solute carrier family 47, member 1
Details	469	50	mmu-miR-146b-5p	Smad4	SMAD family member 4
Details	470	50	mmu-miR-146b-5p	Ceacam1	carcinoembryonic antigen-related cell adhesion molecule 1
Details	471	50	mmu-miR-146b-5p	Atp6v1g3	ATPase, H+ transporting, lysosomal V1 subunit G3
Details	472	50	mmu-miR-146b-5p	Colq	collagen-like tail subunit (single strand of homotrimer) of asymmetric acetylcholinesterase
Details	473	50	mmu-miR-146b-5p	Gpr141b	G protein-coupled receptor 141B
Details	474	50	mmu-miR-146b-5p	Lrrk1	leucine-rich repeat kinase 1
Details	1	98	mmu-miR-155-3p	Sept7	septin 7
Details	2	96	mmu-miR-155-3p	Ubxn10	UBX domain protein 10
Details	3	95	mmu-miR-155-3p	Zfp606	zinc finger protein 606
Details	4	94	mmu-miR-155-3p	St18	suppression of tumorigenicity 18
Details	5	93	mmu-miR-155-3p	U2af2	U2 small nuclear ribonucleoprotein auxiliary factor (U2AF) 2
Details	6	93	mmu-miR-155-3p	Zfp148	zinc finger protein 148
Details	7	93	mmu-miR-155-3p	Gm20498	predicted gene 20498
Details	8	93	mmu-miR-155-3p	Rsad1	radical S-adenosyl methionine domain containing 1
Details	9	93	mmu-miR-155-3p	Cox16	cytochrome c oxidase assembly protein 16
Details	10	91	mmu-miR-155-3p	Gbp8	guanylate-binding protein 8
Details	11	90	mmu-miR-155-3p	Prkaa2	protein kinase, AMP-activated, alpha 2 catalytic subunit
Details	12	89	mmu-miR-155-3p	Stat4	signal transducer and activator of transcription 4
Details	13	89	mmu-miR-155-3p	Adcy1	adenylate cyclase 1
Details	14	88	mmu-miR-155-3p	Kctd1	potassium channel tetramerisation domain containing 1
Details	15	88	mmu-miR-155-3p	Mettl9	methyltransferase like 9
Details	16	87	mmu-miR-155-3p	Ubxn7	UBX domain protein 7
Details	17	87	mmu-miR-155-3p	Tmem127	transmembrane protein 127
Details	18	86	mmu-miR-155-3p	Tshz1	teashirt zinc finger family member 1
Details	19	86	mmu-miR-155-3p	Acss1	acyl-CoA synthetase short-chain family member 1
Details	20	85	mmu-miR-155-3p	Rasgef1b	RasGEF domain family, member 1B
Details	21	84	mmu-miR-155-3p	Ppp6c	protein phosphatase 6, catalytic subunit
Details	22	84	mmu-miR-155-3p	Sertad2	SERTA domain containing 2
Details	23	84	mmu-miR-155-3p	Zfp974	zinc finger protein 974
Details	24	84	mmu-miR-155-3p	Htatsf1	HIV TAT specific factor 1
Details	25	83	mmu-miR-155-3p	Cnpy1	canopy FGF signaling regulator 1
Details	26	83	mmu-miR-155-3p	Abca8b	ATP-binding cassette, sub-family A (ABC1), member 8b
Details	27	83	mmu-miR-155-3p	Zfp629	zinc finger protein 629
Details	28	83	mmu-miR-155-3p	Mbd3	methyl-CpG binding domain protein 3
Details	29	83	mmu-miR-155-3p	Atp1a1	ATPase, Na+/K+ transporting, alpha 1 polypeptide
Details	30	83	mmu-miR-155-3p	Olfr1354	olfactory receptor 1354
Details	31	83	mmu-miR-155-3p	Ablim3	actin binding LIM protein family, member 3
Details	32	83	mmu-miR-155-3p	Fam219a	family with sequence similarity 219, member A
Details	33	82	mmu-miR-155-3p	Wdr37	WD repeat domain 37
Details	34	81	mmu-miR-155-3p	Apbb2	amyloid beta (A4) precursor protein-binding, family B, member 2
Details	35	81	mmu-miR-155-3p	Esp31	exocrine gland secreted peptide 31
Details	36	81	mmu-miR-155-3p	Nr6a1	nuclear receptor subfamily 6, group A, member 1
Details	37	81	mmu-miR-155-3p	Chodl	chondrolectin
Details	38	80	mmu-miR-155-3p	Pate2	prostate and testis expressed 2
Details	39	80	mmu-miR-155-3p	Apc	APC, WNT signaling pathway regulator
Details	40	80	mmu-miR-155-3p	Tnrc6b	trinucleotide repeat containing 6b
Details	41	80	mmu-miR-155-3p	Anxa9	annexin A9
Details	42	80	mmu-miR-155-3p	Srsf3	serine/arginine-rich splicing factor 3
Details	43	80	mmu-miR-155-3p	Zfyve16	zinc finger, FYVE domain containing 16
Details	44	79	mmu-miR-155-3p	Mapkapk3	mitogen-activated protein kinase-activated protein kinase 3
Details	45	79	mmu-miR-155-3p	Zfand5	zinc finger, AN1-type domain 5
Details	46	79	mmu-miR-155-3p	Tmem129	transmembrane protein 129
Details	47	79	mmu-miR-155-3p	Prr11	proline rich 11
Details	48	78	mmu-miR-155-3p	Uba2	ubiquitin-like modifier activating enzyme 2
Details	49	78	mmu-miR-155-3p	Ntrk3	neurotrophic tyrosine kinase, receptor, type 3
Details	50	78	mmu-miR-155-3p	Rhod	ras homolog family member D
Details	51	78	mmu-miR-155-3p	Cngb3	cyclic nucleotide gated channel beta 3
Details	52	77	mmu-miR-155-3p	Cers4	ceramide synthase 4
Details	53	77	mmu-miR-155-3p	D5Ertd577e	DNA segment, Chr 5, ERATO Doi 577, expressed
Details	54	77	mmu-miR-155-3p	Ywhab	tyrosine 3-monooxygenase/tryptophan 5-monooxygenase activation protein, beta polypeptide
Details	55	77	mmu-miR-155-3p	Fam91a1	family with sequence similarity 91, member A1
Details	56	76	mmu-miR-155-3p	Slc25a24	solute carrier family 25 (mitochondrial carrier, phosphate carrier), member 24
Details	57	76	mmu-miR-155-3p	Oxr1	oxidation resistance 1
Details	58	76	mmu-miR-155-3p	Rbfox2	RNA binding protein, fox-1 homolog (C. elegans) 2
Details	59	75	mmu-miR-155-3p	Hira	histone cell cycle regulator
Details	60	75	mmu-miR-155-3p	St3gal4	ST3 beta-galactoside alpha-2,3-sialyltransferase 4
Details	61	75	mmu-miR-155-3p	Msl2	MSL complex subunit 2
Details	62	75	mmu-miR-155-3p	Rhbdd1	rhomboid domain containing 1
Details	63	75	mmu-miR-155-3p	Htr2c	5-hydroxytryptamine (serotonin) receptor 2C
Details	64	73	mmu-miR-155-3p	Cntn2	contactin 2
Details	65	73	mmu-miR-155-3p	Trim5	tripartite motif-containing 5
Details	66	73	mmu-miR-155-3p	Ralbp1	ralA binding protein 1
Details	67	73	mmu-miR-155-3p	Twistnb	twist basic helix-loop-helix transcription factor 1 neighbor
Details	68	72	mmu-miR-155-3p	Fam83a	family with sequence similarity 83, member A
Details	69	72	mmu-miR-155-3p	Ranbp6	RAN binding protein 6
Details	70	72	mmu-miR-155-3p	Ccn2	cellular communication network factor 1
Details	71	71	mmu-miR-155-3p	Ice2	interactor of little elongation complex ELL subunit 2
Details	72	70	mmu-miR-155-3p	Mapre1	microtubule-associated protein, RP/EB family, member 1
Details	73	70	mmu-miR-155-3p	Rai2	retinoic acid induced 2
Details	74	70	mmu-miR-155-3p	Tmtc1	transmembrane and tetratricopeptide repeat containing 1
Details	75	70	mmu-miR-155-3p	Cldn17	claudin 17
Details	76	70	mmu-miR-155-3p	Fn3krp	fructosamine 3 kinase related protein
Details	77	70	mmu-miR-155-3p	Rere	arginine glutamic acid dipeptide (RE) repeats
Details	78	70	mmu-miR-155-3p	Tor3a	torsin family 3, member A
Details	79	69	mmu-miR-155-3p	Trim12c	tripartite motif-containing 12C
Details	80	69	mmu-miR-155-3p	H2-M10.3	histocompatibility 2, M region locus 10.3
Details	81	68	mmu-miR-155-3p	Smarcc2	SWI/SNF related, matrix associated, actin dependent regulator of chromatin, subfamily c, member 2
Details	82	68	mmu-miR-155-3p	Cep350	centrosomal protein 350
Details	83	68	mmu-miR-155-3p	Trim68	tripartite motif-containing 68
Details	84	68	mmu-miR-155-3p	Gnaq	guanine nucleotide binding protein, alpha q polypeptide
Details	85	68	mmu-miR-155-3p	Yeats4	YEATS domain containing 4
Details	86	68	mmu-miR-155-3p	Erf	Ets2 repressor factor
Details	87	67	mmu-miR-155-3p	Rab15	RAB15, member RAS oncogene family
Details	88	67	mmu-miR-155-3p	Zfp251	zinc finger protein 251
Details	89	67	mmu-miR-155-3p	Clca2	chloride channel accessory 2
Details	90	67	mmu-miR-155-3p	Zic1	zinc finger protein of the cerebellum 1
Details	91	66	mmu-miR-155-3p	Slc31a2	solute carrier family 31, member 2
Details	92	66	mmu-miR-155-3p	Hook3	hook microtubule tethering protein 3
Details	93	66	mmu-miR-155-3p	Meaf6	MYST/Esa1-associated factor 6
Details	94	66	mmu-miR-155-3p	Gpc3	glypican 3
Details	95	65	mmu-miR-155-3p	Alkbh5	alkB homolog 5, RNA demethylase
Details	96	65	mmu-miR-155-3p	Amot	angiomotin
Details	97	65	mmu-miR-155-3p	Foxd1	forkhead box D1
Details	98	65	mmu-miR-155-3p	Chrnb2	cholinergic receptor, nicotinic, beta polypeptide 2 (neuronal)
Details	99	65	mmu-miR-155-3p	Tbc1d4	TBC1 domain family, member 4
Details	100	65	mmu-miR-155-3p	Camk2d	calcium/calmodulin-dependent protein kinase II, delta
Details	101	65	mmu-miR-155-3p	Flrt3	fibronectin leucine rich transmembrane protein 3
Details	102	65	mmu-miR-155-3p	Opn1sw	opsin 1 (cone pigments), short-wave-sensitive (color blindness, tritan)
Details	103	64	mmu-miR-155-3p	Tmem106b	transmembrane protein 106B
Details	104	64	mmu-miR-155-3p	Ehd3	EH-domain containing 3
Details	105	64	mmu-miR-155-3p	Maco1	macoilin 1
Details	106	64	mmu-miR-155-3p	Taf1c	TATA-box binding protein associated factor, RNA polymerase I, C
Details	107	64	mmu-miR-155-3p	Fam228a	family with sequence similarity 228, member A
Details	108	64	mmu-miR-155-3p	Slc25a3	solute carrier family 25 (mitochondrial carrier, phosphate carrier), member 3
Details	109	64	mmu-miR-155-3p	Vax1	ventral anterior homeobox 1
Details	110	64	mmu-miR-155-3p	Rufy3	RUN and FYVE domain containing 3
Details	111	64	mmu-miR-155-3p	Hnrnpk	heterogeneous nuclear ribonucleoprotein K
Details	112	64	mmu-miR-155-3p	Stat5b	signal transducer and activator of transcription 5B
Details	113	64	mmu-miR-155-3p	Fmr1	fragile X mental retardation 1
Details	114	64	mmu-miR-155-3p	Klf12	Kruppel-like factor 12
Details	115	64	mmu-miR-155-3p	Epm2aip1	EPM2A (laforin) interacting protein 1
Details	116	64	mmu-miR-155-3p	Zfp59	zinc finger protein 59
Details	117	64	mmu-miR-155-3p	Cox11	cytochrome c oxidase assembly protein 11, copper chaperone
Details	118	63	mmu-miR-155-3p	Tent5a	terminal nucleotidyltransferase 5A
Details	119	63	mmu-miR-155-3p	Pls1	plastin 1 (I-isoform)
Details	120	63	mmu-miR-155-3p	Nhsl2	NHS-like 2
Details	121	63	mmu-miR-155-3p	Slitrk1	SLIT and NTRK-like family, member 1
Details	122	62	mmu-miR-155-3p	Map3k2	mitogen-activated protein kinase kinase kinase 2
Details	123	62	mmu-miR-155-3p	Dpp10	dipeptidylpeptidase 10
Details	124	62	mmu-miR-155-3p	Polr1e	polymerase (RNA) I polypeptide E
Details	125	62	mmu-miR-155-3p	Tmem165	transmembrane protein 165
Details	126	62	mmu-miR-155-3p	Ywhaq	tyrosine 3-monooxygenase/tryptophan 5-monooxygenase activation protein theta
Details	127	62	mmu-miR-155-3p	Fam84b	family with sequence similarity 84, member B
Details	128	62	mmu-miR-155-3p	Gm4894	predicted gene 4894
Details	129	62	mmu-miR-155-3p	Lins1	lines homolog 1
Details	130	61	mmu-miR-155-3p	Phf8	PHD finger protein 8
Details	131	61	mmu-miR-155-3p	Tmx3	thioredoxin-related transmembrane protein 3
Details	132	61	mmu-miR-155-3p	Rpf1	ribosome production factor 1 homolog
Details	133	61	mmu-miR-155-3p	Sla2	Src-like-adaptor 2
Details	134	61	mmu-miR-155-3p	Irgq	immunity-related GTPase family, Q
Details	135	61	mmu-miR-155-3p	Abr	active BCR-related gene
Details	136	61	mmu-miR-155-3p	Ahrr	aryl-hydrocarbon receptor repressor
Details	137	61	mmu-miR-155-3p	Mmachc	methylmalonic aciduria cblC type, with homocystinuria
Details	138	61	mmu-miR-155-3p	Pi15	peptidase inhibitor 15
Details	139	61	mmu-miR-155-3p	Ap1g1	adaptor protein complex AP-1, gamma 1 subunit
Details	140	61	mmu-miR-155-3p	Ccl27a	chemokine (C-C motif) ligand 27A
Details	141	60	mmu-miR-155-3p	Ube2d1	ubiquitin-conjugating enzyme E2D 1
Details	142	60	mmu-miR-155-3p	Zdhhc21	zinc finger, DHHC domain containing 21
[truncated: 10,249 more rows]

## Sheet: DE target genes
Common genes of target genes and RRA genes	Up regulated genes	Down regulated genes
Map2k3	Map2k3	Zfp467
Cxadr	Cxadr	Ranbp3l
Plaur	Plaur	Galm
Mthfd2	Mthfd2	Sfrp1
Zfp467	Dusp8	Ass1
Dusp8	Tgfbi	Cyp7b1
Tgfbi	Ifrd1	Crebl2
Ifrd1	Klf6	A4gnt
Ranbp3l	Fos	Aplnr
Klf6	Emp1	Zfp760
Fos	Serpine1	Klhl9
Galm	Tacstd2	Acmsd
Emp1	Fosl2	Slc39a8
Serpine1	Cebpb	Bsnd
Tacstd2	Rell1	Fam107a
Fosl2	Slc38a2	Zfp101
Sfrp1	Sox9	Mgat3
Cebpb	Itga6
Rell1	Hspb1
Ass1	Hbegf
Slc38a2	Csf1
Cyp7b1	Slc7a1
Sox9	Gprc5a
Itga6	D17H6S56E-5
Hspb1	Grp
Hbegf	Mafk
Csf1	Pprc1
Crebl2	Rnd3
Slc7a1	Hmga1
A4gnt	Chac1
Gprc5a	Csrnp1
D17H6S56E-5	Mthfd1l
Grp	Hpcal4
Mafk	Fosl1
Aplnr	Cldn4
Pprc1	F3
Rnd3	Eaf1
Hmga1	Txnrd1
Chac1	Lmna
Csrnp1	Dusp4
Mthfd1l	Ptp4a1
Hpcal4	Igf2bp2
Fosl1	Pdk4
Zfp760	Sfn
Cldn4	Rasd1
F3	Pvr
Eaf1	Il34
Txnrd1	Clcf1
Lmna	Adamts1
Klhl9	Spp1
Dusp4	Adm
Ptp4a1
Igf2bp2
Pdk4
Sfn
Rasd1
Acmsd
Pvr
Il34
Clcf1
Slc39a8
Bsnd
Fam107a
Zfp101
Adamts1
Spp1
Adm
Mgat3

## Sheet: Regulatory miRNA mRNA
Target Detail	Target Rank	Target Score	miRNA Name	Gene Symbol	Gene Description
Details	719	54	mmu-miR-21a-3p	Zfp467	zinc finger protein 467
Details	47	89	mmu-miR-21a-5p	Ranbp3l	RAN binding protein 3-like
Details	285	62	mmu-miR-223-3p	Ranbp3l	RAN binding protein 3-like
Details	124	58	mmu-miR-146b-3p	Galm	galactose mutarotase
Details	175	56	mmu-miR-155-3p	Sfrp1	secreted frizzled-related protein 1
Details	164	80	mmu-miR-155-5p	Ass1	argininosuccinate synthetase 1
Details	364	59	mmu-miR-155-5p	Cyp7b1	cytochrome P450, family 7, subfamily b, polypeptide 1
Details	719	56	mmu-miR-214-3p	Crebl2	cAMP responsive element binding protein-like 2
Details	29	85	mmu-miR-214-5p	Crebl2	cAMP responsive element binding protein-like 2
Details	67	96	mmu-miR-15b-5p	Crebl2	cAMP responsive element binding protein-like 2
Details	674	69	mmu-miR-181b-5p	Crebl2	cAMP responsive element binding protein-like 2
Details	851	52	mmu-miR-214-3p	A4gnt	alpha-1,4-N-acetylglucosaminyltransferase
Details	4	80	mmu-miR-25-5p	Aplnr	apelin receptor
Details	451	51	mmu-miR-31-5p	Aplnr	apelin receptor
Details	761	66	mmu-miR-15b-5p	Zfp760	zinc finger protein 760
Details	430	58	mmu-miR-342-3p	Zfp760	zinc finger protein 760
Details	288	65	mmu-miR-223-5p	Klhl9	kelch-like 9
Details	70	75	mmu-miR-31-3p	Acmsd	amino carboxymuconate semialdehyde decarboxylase
Details	454	51	mmu-miR-31-5p	Slc39a8	solute carrier family 39 (metal ion transporter), member 8
Details	145	80	mmu-miR-181b-1-3p	Bsnd	barttin CLCNK type accessory beta subunit
Details	145	80	mmu-miR-181b-2-3p	Bsnd	barttin CLCNK type accessory beta subunit
Details	366	61	mmu-miR-181b-1-3p	Fam107a	family with sequence similarity 107, member A
Details	366	61	mmu-miR-181b-2-3p	Fam107a	family with sequence similarity 107, member A
Details	225	90	mmu-miR-181b-5p	Zfp101	zinc finger protein 101
Details	897	59	mmu-miR-181b-5p	Mgat3	mannoside acetylglucosaminyltransferase 3
